# Supplementary material for: Synthesis of N-substituted ε-hexonolactams as pharmacological chaperones for the treatment of N370S mutant Gaucher disease
Source: Royal Society of Chemistry journal article supplement (doi:10.1039/c2ob06987c), 2012-01-01

## Electronic Supplementary Information

### Synthesis of *N*-Substituted $\epsilon$ -Hexanolactams as Pharmacological Chaperones for the Treatment of N370S Mutant Gaucher Disease

Guan-Nan Wang,<sup>a</sup> Gabriele Twigg,<sup>b</sup> Terry D. Butters,<sup>b</sup> Siwei Zhang,<sup>a</sup> Liangren  
Zhang,<sup>a</sup> Li-He Zhang,<sup>a</sup> and Xin-Shan Ye<sup>a,\*</sup>

<sup>a</sup>State Key Laboratory of Natural and Biomimetic Drugs and School of Pharmaceutical Sciences, Peking University, Xue Yuan Road No. 38, Beijing 100191, China. E-mail: [xinshan@bjmu.edu.cn](mailto:xinshan@bjmu.edu.cn)

<sup>b</sup>Glycobiology Institute, Department of Biochemistry, University of Oxford, South Parks Road, Oxford OX1 3QU, United Kingdom.

### Table of contents

|                                                                                           |     |
|-------------------------------------------------------------------------------------------|-----|
| Chemistry Section                                                                         | S1  |
| Biology Section                                                                           | S14 |
| Computer Section                                                                          | S16 |
| References                                                                                | S17 |
| <sup>1</sup> H and <sup>13</sup> C NMR Spectra of Compound <b>6a</b>                      | S18 |
| <sup>1</sup> H and <sup>13</sup> C NMR Spectra of Compound <b>6b</b>                      | S19 |
| <sup>1</sup> H, <sup>13</sup> C, COSY, NOESY, HSQC and HMBC Spectra of Compound <b>6c</b> | S20 |
| <sup>1</sup> H and <sup>13</sup> C NMR Spectra of Compound <b>6d</b>                      | S23 |
| <sup>1</sup> H and <sup>13</sup> C NMR Spectra of Compound <b>7a</b>                      | S24 |
| <sup>1</sup> H and <sup>13</sup> C NMR Spectra of Compound <b>7b</b>                      | S25 |
| <sup>1</sup> H and <sup>13</sup> C NMR Spectra of Compound <b>7c</b>                      | S26 |
| <sup>1</sup> H and <sup>13</sup> C NMR Spectra of Compound <b>7d</b>                      | S27 |
| <sup>1</sup> H and <sup>13</sup> C NMR Spectra of Compound <b>9a</b>                      | S28 |
| <sup>1</sup> H and <sup>13</sup> C NMR Spectra of Compound <b>9b</b>                      | S29 |
| <sup>1</sup> H and <sup>13</sup> C NMR Spectra of Compound <b>9c</b>                      | S30 |
| <sup>1</sup> H and <sup>13</sup> C NMR Spectra of Compound <b>9d</b>                      | S31 |

|                                                                                |     |
|--------------------------------------------------------------------------------|-----|
| $^1\text{H}$ and $^{13}\text{C}$ NMR Spectra of Compound <b>10a</b>            | S32 |
| $^1\text{H}$ and $^{13}\text{C}$ NMR Spectra of Compound <b>10b</b>            | S33 |
| $^1\text{H}$ and $^{13}\text{C}$ NMR Spectra of Compound <b>10c</b>            | S34 |
| $^1\text{H}$ and $^{13}\text{C}$ NMR Spectra of Compound <b>10d</b>            | S35 |
| $^1\text{H}$ and $^{13}\text{C}$ NMR Spectra of Compound <b>12a</b>            | S36 |
| $^1\text{H}$ and $^{13}\text{C}$ NMR Spectra of Compound <b>12c</b>            | S37 |
| $^1\text{H}$ and $^{13}\text{C}$ NMR Spectra of Compound <b>12d</b>            | S38 |
| $^1\text{H}$ and $^{13}\text{C}$ NMR Spectra of Compound <b>12e</b>            | S39 |
| $^1\text{H}$ and $^{13}\text{C}$ NMR Spectra of Compound <b>13a</b>            | S40 |
| $^1\text{H}$ and $^{13}\text{C}$ NMR Spectra of Compound <b>13c</b>            | S41 |
| $^1\text{H}$ and $^{13}\text{C}$ NMR Spectra of Compound <b>13d</b>            | S42 |
| $^1\text{H}$ and $^{13}\text{C}$ NMR Spectra of Compound <b>13e</b>            | S43 |
| $^1\text{H}$ and $^{13}\text{C}$ NMR Spectra of Compound <b>14c</b>            | S44 |
| $^1\text{H}$ , $^{13}\text{C}$ , COSY and NOESY Spectra of Compound <b>15c</b> | S45 |
| $^1\text{H}$ and $^{13}\text{C}$ NMR Spectra of Compound <b>7c'</b>            | S47 |
| $^1\text{H}$ and $^{13}\text{C}$ NMR Spectra of Compound <b>16c</b>            | S48 |
| $^1\text{H}$ and $^{13}\text{C}$ NMR Spectra of Compound <b>10c'</b>           | S49 |
| $^1\text{H}$ and $^{13}\text{C}$ NMR Spectra of Compound <b>17</b>             | S50 |
| $^1\text{H}$ and $^{13}\text{C}$ NMR Spectra of Compound <b>18</b>             | S51 |
| $^1\text{H}$ and $^{13}\text{C}$ NMR Spectra of Compound <b>19</b>             | S52 |
| $^1\text{H}$ and $^{13}\text{C}$ NMR Spectra of Compound <b>20</b>             | S53 |
| $^1\text{H}$ and $^{13}\text{C}$ NMR Spectra of Compound <b>21</b>             | S54 |

## Chemistry Section:

**General.** Air- and/or moisture-sensitive reactions were carried out under an atmosphere of argon using flame-dried glassware and standard syringe/septa techniques. All chemicals were purchased as reagent grade and used without further purification, unless otherwise noted. Dichloromethane ( $\text{CH}_2\text{Cl}_2$ ) and pyridine were distilled over calcium hydride ( $\text{CaH}_2$ ). Methanol was distilled from magnesium. DMF was stirred with  $\text{CaH}_2$  and distilled under reduced pressure. Tetrahydrofuran (THF) was distilled over sodium/benzophenone. Reactions were monitored by analytical thin-layer chromatography on silica gel 60 F<sub>254</sub> precoated on aluminium plates (E. Merck). Spots were detected under UV (254 nm) and/or by staining with acidic ceric ammonium molybdate. Column chromatography was performed on silica gel (200-300 mesh). <sup>1</sup>H-NMR spectra were recorded on a JEOL AL-300, or Varian INOVA-500 spectrometers at 25 °C. Chemical shifts (in ppm) were referenced to tetramethylsilane ( $\delta = 0$  ppm) in deuterated chloroform. <sup>13</sup>C-NMR spectra were obtained by using the same NMR spectrometers and were calibrated with  $\text{CDCl}_3$  ( $\delta = 77.00$  ppm) or  $\text{CD}_3\text{OD}$  ( $\delta = 49.00$  ppm). Mass spectra were recorded using a PE SCLEX QSTAR spectrometer. Elemental analysis data were recorded on a Vario EL-III elemental analyzer. All the tested compounds possess a purity of at least 95% as determined by HPLC. Analytical HPLC was run on the Shimadzu LC-20AD HPLC instrument coupled with SPD-M20A detector, using SHIMADZU C18 VP-ODS column 150L×4.6 or Agilent 1100 Series instrument equipped with VWD-detector, using C-18 reversed column (DIKMA, Diamonsil C18 250mm\*4.6mm, 5 $\mu\text{m}$ ) and UV detection at 210 nm. Flow rate = 1 mL/min. The eluent system is: for method A, linear gradient from 95% H<sub>2</sub>O (with phosphoric acid, pH = 3) to 100% MeOH at 40 min; for method B, isocratic 80% methanol in water. Retention times ( $t_R$ ) are given in minutes.

**General procedure for the synthesis of *N*-substituted  $\epsilon$ -gluconolactams:** IBX (3.5 g, 12.4 mmol) was added to a solution of compound **4**<sup>1</sup> (1.4 g, 3.1 mmol) in ethyl acetate (30 mL). The mixture was heated under reflux overnight and then cooled to room temperature. The mixture was filtered through Celite and the filtrate was concentrated to afford product **5** (1.39 g) as a light yellow oil which was able to be stored at -20 °C under Argon for three months. To a solution of compound **5** (190 mg, 0.43 mmol) in MeOH (30 mL), amine (0.85 mmol), NaCNBH<sub>3</sub> (56 mg, 0.85 mmol), and ZnCl<sub>2</sub> (12 mg, 0.085 mmol) were added, and the mixture was heated under reflux for 2 h, followed by quenching with saturated NaHCO<sub>3</sub>. After removal of the solvent, the residue was dissolved in ethyl acetate (80 mL) and washed by saturated sodium chloride aqueous solution (20 mL  $\times$ 2). The organic phase was dried over anhydrous sodium sulfate. The dried solution was filtered and the filtrate was concentrated. The residue was purified by column chromatography on silica gel to provide the products.

**(3*R*,4*S*,5*R*,6*R*)-3,4,5-Tris(benzyloxy)-6-hydroxy-1-(2-hydroxyethyl)azepan-2-one (6a).** Yield: 72%, colorless oil after column chromatography (petroleum ether-ethyl acetate, 1:1). <sup>1</sup>H NMR (300 MHz, CDCl<sub>3</sub>)  $\delta$  2.27 (s, 1H), 3.07-3.14 (m, 1H), 3.45-3.50 (m, 1H), 3.56-3.60 (m, 1H), 3.69-3.72 (m, 2H), 3.83 (t, *J* = 10.5 Hz, 1H), 3.91-3.99 (m, 4H), 4.26 (d, *J* = 6.6 Hz, 1H), 4.41-4.46 (m, 2H), 4.55 (d, *J* = 11.4 Hz, 1H), 4.70-4.77 (m, 2H), 4.88 (d, *J* = 11.7 Hz, 1H), 7.29-7.42 (m, 15H); <sup>13</sup>C NMR (75 MHz, CDCl<sub>3</sub>)  $\delta$  51.6, 53.4, 61.1, 67.6, 72.6, 73.8, 74.0, 78.0, 80.3, 80.6, 127.65, 127.74, 127.98, 128.05, 128.2, 128.3, 128.4, 137.2, 137.6, 137.7, 169.7; HRMS: Calcd for C<sub>29</sub>H<sub>34</sub>NO<sub>6</sub>[M+H]<sup>+</sup>, 492.2381; Found, 492.2380.

**(3*R*,4*S*,5*R*,6*R*)-3,4,5-Tris(benzyloxy)-6-hydroxy-1-(6-hydroxyhexyl)azepan-2-one (6b).** Yield: 82%, colorless oil after column chromatography (petroleum ether-ethyl acetate, 1:1). <sup>1</sup>H NMR (300 MHz, CDCl<sub>3</sub>)  $\delta$  1.26-1.43 (m, 4H), 1.48-1.58 (m, 4H), 1.78 (s, 1H), 2.88 (d, *J* = 6.9 Hz, 1H), 3.18-3.34 (m, 2H), 3.59 (t, *J* = 6.3 Hz, 2H), 3.62-3.69 (m, 1H), 3.74 (t, *J* = 5.1 Hz, 1H), 3.78-3.87 (m, 1H), 3.93 (m, 1H), 4.00 (t, *J* = 5.7 Hz, 1H), 4.34-4.38 (m, 2H), 4.47 (d, *J* = 11.7 Hz, 1H), 4.56 (d, *J* = 11.4 Hz, 1H), 4.73-4.82 (m, 3H), 7.22-7.40 (m, 15H); <sup>13</sup>C NMR (75 MHz, CDCl<sub>3</sub>)  $\delta$  25.1, 26.2, 27.7,

32.5, 48.8, 48.9, 62.5, 67.5, 72.3, 73.2, 73.5, 75.9, 80.1, 82.0, 127.7, 127.9, 127.95, 128.03, 128.3, 128.4, 128.5, 137.3, 137.6, 137.7, 168.9; Anal. Calcd for C<sub>33</sub>H<sub>41</sub>NO<sub>6</sub>: C, 72.37; H, 7.55; N, 2.56; Found: C, 72.52; H, 7.36; N, 2.70; ESI-MS: 548 [M+H]<sup>+</sup>.

**(3R,4S,5R,6R)-3,4,5-Tris(benzyloxy)-6-hydroxy-1-butylazepan-2-one (6c)**. Yield: 89% as a mixture of diastereomers (ratio 9:1, **6c** as the major isomer). The two diastereomers were isolated after benzylation by the procedure as described in the following: benzoyl chloride (330 μL, 2.88 mmol) was added dropwise to a solution of **6c** with its 6-hydroxy epimer (180 mg, 0.36 mmol) and DMAP (10 mg, 0.072 mmol) in pyridine (20 mL) under Argon. The reaction was stirred at room temperature for 2 h, then pyridine was removed under reduced pressure and co-evaporated with toluene (20 mL × 2). The residue was dissolved in ethyl acetate (50 mL), to which saturated potassium carbonate solution (10 mL) was added and stirred for 30 min. The organic phase was separated from aqueous phase, washed by brine, dried over Na<sub>2</sub>SO<sub>4</sub>, and concentrated. The residue was purified by column chromatography on silica gel (petroleum ether-ethyl acetate, 11:1 to 10:1) to afford compound **14c** (191 mg, 88% yield).

**(3R,4S,5R,6R)-3,4,5-Tris(benzyloxy)-6-benzoyloxy-1-butylazepan-2-one (14c)**. <sup>1</sup>H NMR (500 MHz, CDCl<sub>3</sub>) δ 0.87 (t, *J* = 7.5 Hz, 3H), 1.24-1.34 (m, 2H), 1.49-1.53 (m, 2H), 3.26 (m, 1H), 3.44-3.53 (m, 1H), 3.65 (m, 1H), 3.96-4.00 (m, 3H), 4.40-4.41 (m, 1H), 4.50 (d, *J* = 12.0 Hz, 1H), 4.54-4.60 (m, 2H), 4.64 (d, *J* = 11.5 Hz, 1H), 4.75 (d, *J* = 11.5 Hz, 1H), 4.81-4.83 (m, 1H), 5.38 (s, 1H), 7.21-7.45 (m, 17H), 7.57-7.60 (m, 1H), 7.98-8.00 (m, 2H); <sup>13</sup>C NMR (75 MHz, CDCl<sub>3</sub>) δ 13.8, 20.1, 29.9, 46.6, 48.9, 70.5, 72.4, 73.5, 73.6, 77.2, 79.1, 127.6, 127.8, 128.1, 128.2, 128.3, 128.4, 128.5, 129.7, 133.3, 137.7, 137.8, 165.7, 168.9. Anal. Calcd for C<sub>38</sub>H<sub>41</sub>NO<sub>6</sub>: C, 75.10; H, 6.80; N, 2.30; Found: C, 74.89; H, 6.62; N, 2.31; ESI-MS: 608 [M+H]<sup>+</sup>.

Compound **14c** (191 mg, 0.31 mmol) was dissolved in methanol (10 mL), to which NaOMe (1 M solution in methanol, 1 mL, 1 mmol) was added and the mixture was stirred for 1 h at room temperature. The solution was neutralize to pH = 7 with Dowex 50w H<sup>+</sup> resin. The resin was then removed by filtration and washed with ethyl acetate.

The solvent was removed on a rotary evaporator and the residue was purified by column chromatography on silica gel (petroleum ether-ethyl acetate, 3:1) to afford compound **6c** (155 mg, 98% yield) as colorless oil:  $^1\text{H}$  NMR (500 MHz,  $\text{CDCl}_3$ )  $\delta$  0.90 (t,  $J = 7.0$  Hz, 3H), 1.25-1.33 (m, 2H), 1.46-1.52 (m, 2H), 2.85 (d,  $J = 7.5$  Hz, 1H), 3.20-3.25 (m, 1H), 3.31-3.34 (m, 1H), 3.60-3.66 (m, 1H), 3.73 (dd,  $J = 4.5, 5.5$  Hz, 1H), 3.78-3.82 (m, 1H), 3.92-3.96 (m, 1H), 4.00 (t,  $J = 5.5$  Hz, 1H), 4.35 (d,  $J = 5.5$  Hz, 1H), 4.37 (d,  $J = 11.5$  Hz, 1H), 4.47 (d,  $J = 11.5$  Hz, 1H), 4.55 (d,  $J = 11.0$  Hz, 1H), 4.73-4.76 (m, 2H), 4.80 (d,  $J = 11.5$  Hz, 1H), 7.23-7.39 (m, 15H);  $^{13}\text{C}$  NMR (125 MHz,  $\text{CDCl}_3$ )  $\delta$  13.8, 20.0, 30.0, 48.8, 49.0, 67.5, 72.3, 73.2, 73.5, 76.0, 80.1, 82.1, 127.7, 127.8, 127.97, 128.01, 128.04, 128.3, 128.36, 128.45, 137.3, 137.66, 137.73, 168.7; Anal. Calcd for  $\text{C}_{36}\text{H}_{47}\text{NO}_5$ : C, 73.93; H, 7.41; N, 2.78; Found: C, 73.80; H, 7.25; N, 2.75; ESI-MS: 504  $[\text{M}+\text{H}]^+$ .

**(3R,4S,5R,6R)-3,4,5-Tris(benzyloxy)-6-hydroxy-1-nonylazepan-2-one (6d)**. Yield: 91% as a mixture of diastereomers (ratio 9:1, **6d** as the major isomer). The two diastereomers were isolated by benzylation as the procedure described in the preparation of compound **6c**. After debenzolation, compound **6d** (78% yield from **4** after three steps) was provided as colorless oil after column chromatography (petroleum ether-ethyl acetate, 5:1).  $^1\text{H}$  NMR (300 MHz,  $\text{CDCl}_3$ )  $\delta$  0.88 (t,  $J = 6.6$  Hz, 3H), 1.25 (s, 12H), 1.50 (m, 2H), 2.87 (d,  $J = 7.5$  Hz, 1H), 3.17-3.27 (m, 1H), 3.30-3.34 (m, 1H), 3.57-3.67 (m, 1H), 3.71-3.74 (m, 2H), 3.94 (m, 1H), 4.00 (t,  $J = 5.7$  Hz, 1H), 4.34-4.38 (m, 2H), 4.47 (d,  $J = 11.4$  Hz, 1H), 4.55 (d,  $J = 11.4$  Hz, 1H), 4.73-4.83 (m, 3H), 7.22-7.39 (m, 15H);  $^{13}\text{C}$  NMR (75 MHz,  $\text{CDCl}_3$ )  $\delta$  14.1, 22.6, 26.8, 27.9, 29.2, 29.4, 29.5, 31.8, 48.9, 49.1, 67.5, 72.3, 73.2, 73.4, 80.1, 82.0, 127.7, 127.8, 127.96, 128.00, 128.29, 128.34, 128.4, 137.3, 137.6, 137.7, 168.6; Anal. Calcd for  $\text{C}_{36}\text{H}_{47}\text{NO}_5$ : C, 75.36; H, 8.26; N, 2.44; Found: C, 75.41; H, 8.08; N, 2.48; ESI-MS: 596  $[\text{M}+\text{Na}]^+$ .

**(3R,4S,5R,6R)-3,4,5,6-Tetrahydroxy-1-(2-hydroxyethyl)azepan-2-one (7a)**. A mixture of **6a** (30.0 mg, 0.061 mmol) and 10% Pd-C (10.0 mg) in THF (4.0 mL),  $\text{H}_2\text{O}$  (2.0 mL), and HOAc (1.0 mL) was stirred under hydrogen atmosphere (4 atm) for 48

h. The catalyst was then removed by filtration through Celite, and the filtrate was concentrated. The residue was subjected to a C-18 reversed-phase column chromatography (eluent, H<sub>2</sub>O) to give **7a** (13.0 mg, 92%) as a colorless oil. <sup>1</sup>H NMR (300 MHz, D<sub>2</sub>O) δ 3.07-3.16 (m, 1H), 3.30-3.62 (m, 6H), 3.68-3.80 (m, 1H), 3.97 (dd, *J* = 3.3, 6.0 Hz, 1H), 4.13 (d, *J* = 9.9 Hz, 1H); <sup>13</sup>C NMR (75 MHz, D<sub>2</sub>O) δ 49.7, 53.6, 60.0, 69.4, 70.6, 70.9, 77.0, 174.0; HRMS: Calcd for C<sub>8</sub>H<sub>15</sub>NO<sub>6</sub>Na [M+Na<sup>+</sup>], 244.0792; Found, 244.0797. HPLC: 100% (method A, *t*<sub>R</sub> = 2.29 min).

**(3R,4S,5R,6R)-3,4,5,6-Tetrahydroxy-1-(6-hydroxyhexyl)azepan-2-one (7b).**

Compound **7b** was prepared from compound **6b** as described in the preparation of compound **7a**, yielding **7b** (94% yield) as a colorless oil. <sup>1</sup>H NMR (300 MHz, D<sub>2</sub>O) δ 1.10-1.24 (m, 4H), 1.32-1.44 (m, 4H), 2.75-2.85 (m, 1H), 3.28-3.55 (m, 6H), 3.70-3.80 (m, 1H), 3.95-3.98 (m, 1H), 4.09 (d, *J* = 9.6 Hz, 1H); <sup>13</sup>C NMR (75 MHz, D<sub>2</sub>O) δ 25.8, 26.7, 27.6, 32.2, 48.8, 51.9, 62.7, 69.3, 70.6, 70.7, 77.0, 173.1; HRMS: Calcd for C<sub>12</sub>H<sub>23</sub>NO<sub>6</sub>Na [M+Na]<sup>+</sup>, 300.1418; Found, 300.1419. HPLC: 98.1% (method A, *t*<sub>R</sub> = 10.17 min).

**(3R,4S,5R,6R)-1-Butyl-3,4,5,6-tetrahydroxyazepan-2-one (7c).** Compound **7c** was prepared from compound **6c** as described in the preparation of compound **7a**, yielding **7c** (96% yield) as a colorless oil. <sup>1</sup>H NMR (300 MHz, D<sub>2</sub>O): δ 0.73 (t, *J* = 7.2 Hz, 3H), 1.05-1.17 (m, 2H), 1.28-1.41 (m, 2H), 2.75-2.84 (m, 1H), 3.28-3.55 (m, 4H), 3.70-3.80 (m, 1H), 3.97 (dd, *J* = 3.3, 6.0 Hz, 1H), 4.09 (d, *J* = 9.9 Hz, 1H); <sup>13</sup>C NMR (75 MHz, D<sub>2</sub>O) δ 14.1, 20.4, 29.9, 48.8, 51.8, 69.3, 70.6, 70.7, 77.0, 173.1; HRMS: Calcd for C<sub>10</sub>H<sub>20</sub>NO<sub>5</sub> [M+H]<sup>+</sup>, 234.1336; Found, 234.1331. HPLC: 98.7% (method A, *t*<sub>R</sub> = 11.38 min).

**(3R,4S,5R,6R)-1-Nonyl-3,4,5,6-tetrahydroxyazepan-2-one (7d).** Compound **7d** was prepared from compound **6d** as described in the preparation of compound **7a**, yielding **7d** (95% yield) as an amorphous solid after lyophilization. <sup>1</sup>H NMR (300 MHz, CD<sub>3</sub>OD) δ 0.89 (t, *J* = 6.9 Hz, 3H), 1.29 (s, 12H), 1.52-1.57 (m, 2H), 2.97-3.07 (m, 1H), 3.40-3.63 (m, 4H), 3.84-3.94 (m, 1H), 3.99 (dd, *J* = 3.3, 6.3 Hz, 1H), 4.08 (d, *J* = 9.3 Hz, 1H); <sup>13</sup>C NMR (75 MHz, CD<sub>3</sub>OD) δ 14.5, 23.7, 28.0, 28.6, 30.4, 30.5, 30.7,

33.0, 49.1, 52.0, 69.8, 71.3, 71.6, 78.1, 173.2; HRMS: Calcd for  $C_{15}H_{29}NO_5Na$   $[M+Na]^+$ , 326.1938; Found, 326.1938. HPLC: 100.0% (method A,  $t_R = 27.55$  min).

**(3R,4S,5S,6R)-3,4,5-Tris(benzyloxy)-6-hydroxy-1-(2-hydroxyethyl)azepan-2-one**

**(9a).** Compound **9a** was prepared from compound **8**<sup>1</sup> as described in the preparation of **6a**. Yield: 77% as colorless oil after column chromatography (petroleum ether-ethyl acetate, 1:1). <sup>1</sup>H NMR (300 MHz,  $CDCl_3$ )  $\delta$  1.85 (brs, 1H), 2.91 (brs, 1H), 3.27-3.73 (m, 6H), 4.03-4.11 (m, 3H), 4.38-4.72 (m, 7H), 7.27-7.34 (m, 15H); <sup>13</sup>C NMR (75 MHz,  $CDCl_3$ )  $\delta$  50.5, 53.0, 61.3, 68.9, 72.1, 72.8, 73.0, 82.1, 82.6, 127.9, 128.0, 128.3, 128.5, 128.6, 136.9, 137.5, 170.3; HRMS: Calcd for  $C_{29}H_{34}NO_6$   $[M+H]^+$ , 492.2381; Found, 492.2377.

**(3R,4S,5S,6R)-3,4,5-Tris(benzyloxy)-6-hydroxy-1-(6-hydroxyhexyl)azepan-2-one**

**(9b).** Compound **9b** was prepared from compound **8** as described in the preparation of **6a**. Yield: 71% as colorless oil after column chromatography (petroleum ether-ethyl acetate, 2:1). <sup>1</sup>H NMR (300 MHz,  $CDCl_3$ )  $\delta$  1.22-1.36 (m, 4H), 1.40-1.56 (m, 4H), 2.12 (brs, 1H), 2.80 (brs, 1H), 3.16-3.20 (m, 1H), 3.25-3.34 (m, 1H), 3.54 (t,  $J = 6.0$  Hz, 2H), 3.58-3.63 (m, 1H), 3.70 (m, 1H), 3.95-4.00 (m, 2H), 4.07 (dd,  $J = 2.4, 6.6$  Hz, 1H), 4.36-4.74 (m, 7H), 7.27-7.37 (m, 15H); <sup>13</sup>C NMR (75 MHz,  $CDCl_3$ )  $\delta$  25.0, 25.9, 27.5, 32.3, 49.0, 62.2, 68.6, 71.9, 72.6, 81.9, 82.8, 127.7, 127.8, 128.0, 128.2, 128.4, 128.5, 136.9, 137.5, 137.6, 169.0; Anal. Calcd for  $C_{33}H_{41}NO_6$ : C, 72.37; H, 7.55; N, 2.56; Found: C, 72.26; H, 7.53; N, 2.70; ESI-MS: 548  $[M+H]^+$ .

**(3R,4S,5S,6R)-3,4,5-Tris(benzyloxy)-6-hydroxy-1-butylazepan-2-one** **(9c).**

Compound **9c** was prepared from compound **8** as described in the preparation of **6a**. Yield: 82% as colorless oil after column chromatography (petroleum ether-ethyl acetate, 4:1). <sup>1</sup>H NMR (300 MHz,  $CDCl_3$ )  $\delta$  0.89 (t,  $J = 7.2$  Hz, 3H), 1.25-1.37 (m, 2H), 1.47-1.57 (m, 2H), 2.56 (s, 1H), 3.18 (m, 1H), 3.31-3.40 (m, H), 3.49-3.59 (m, 1H), 3.71-3.75 (m, 1H), 3.96-4.01 (m, 2H), 4.09 (dd,  $J = 2.7, 6.6$  Hz, 1H), 4.34-4.75 (m, 7H), 7.26-7.38 (m, 15H); <sup>13</sup>C NMR (75 MHz,  $CDCl_3$ )  $\delta$  13.8, 20.0, 29.9, 49.0, 49.2, 68.7, 71.9, 72.6, 82.0, 82.8, 127.7, 127.9, 128.0, 128.3, 128.5, 128.6, 137.0, 137.5, 137.6, 168.8; HRMS: Calcd for  $C_{31}H_{38}NO_5$   $[M+H]^+$ , 504.2744; Found,



504.2747.

**(3R,4S,5S,6R)-3,4,5-Tris(benzyloxy)-6-hydroxy-1-nonylazepan-2-one (9d).**

Compound **9d** was prepared from compound **8** as described in the preparation of **6a**. Yield: 78% as colorless oil after column chromatography (petroleum ether-ethyl acetate, 6:1);  $^1\text{H}$  NMR (300 MHz,  $\text{CDCl}_3$ )  $\delta$  0.87 (t,  $J = 7.2$  Hz, 3H), 1.23 (s, 12H), 1.52 (m, 2H), 2.53 (s, 1H), 3.21 (m, 1H), 3.32-3.41 (m, 1H), 3.47-3.54 (m, 1H), 3.71 (m, 1H), 3.96-3.99 (m, 2H), 4.09 (dd,  $J = 2.4, 6.6$  Hz, 1H), 4.34-4.76 (m, 7H), 7.26-7.38 (m, 15H);  $^{13}\text{C}$  NMR (75 MHz,  $\text{CDCl}_3$ )  $\delta$  14.1, 22.6, 26.8, 27.8, 29.2, 29.4, 29.5, 31.8, 49.0, 49.5, 68.7, 71.9, 72.6, 82.0, 82.8, 127.7, 127.9, 128.0, 128.3, 128.4, 128.6, 137.0, 137.5, 137.7, 168.8; Anal. Calcd for  $\text{C}_{36}\text{H}_{47}\text{NO}_5$ : C, 75.36; H, 8.26; N, 2.44; Found: C, 75.42; H, 8.19; N, 2.52; ESI-MS: 574  $[\text{M}+\text{H}]^+$ .

**(3R,4S,5S,6R)-3,4,5,6-Tetrahydroxy-1-(2-hydroxyethyl)azepan-2-one (10a).**

Compound **10a** was prepared from compound **9a** as described in the preparation of compound **7a**, yielding **10a** (94% yield) as a colorless oil:  $^1\text{H}$  NMR (300 MHz,  $\text{D}_2\text{O}$ )  $\delta$  3.08-3.32 (m, 2H), 3.57 (t,  $J = 5.4$  Hz, 3H), 3.74-3.81 (m, 4H), 4.44 (d,  $J = 8.7$  Hz, 1H);  $^{13}\text{C}$  NMR (75 MHz,  $\text{D}_2\text{O}$ )  $\delta$  48.7, 52.7, 59.6, 68.8, 69.4, 70.0, 73.3, 174.2; HRMS: Calcd for  $\text{C}_8\text{H}_{15}\text{NO}_6\text{Na}$   $[\text{M}+\text{Na}]^+$ , 244.0792; Found, 244.0797. HPLC: 100.0% (method A,  $t_{\text{R}} = 2.04$  min).

**(3R,4S,5S,6R)-3,4,5,6-Tetrahydroxy-1-(2-hydroxyhexyl)azepan-2-one (10b).**

Compound **10b** was prepared from compound **9b** as described in the preparation of compound **7a**, yielding **10b** (95% yield) as a colorless oil:  $^1\text{H}$  NMR (300 MHz,  $\text{D}_2\text{O}$ )  $\delta$  1.11-1.25 (m, 4H), 1.34-1.43 (m, 4H), 2.94 (m, 1H), 3.08-3.25 (m, 1H), 3.43 (t,  $J = 6.6$  Hz, 2H), 3.50-3.74 (m, 5H), 4.41 (d,  $J = 9.0$  Hz, 1H);  $^{13}\text{C}$  NMR (75 MHz,  $\text{D}_2\text{O}$ )  $\delta$  25.4, 26.3, 27.2, 31.7, 48.1, 50.9, 62.3, 68.7, 69.3, 70.2, 73.4, 173.4; HRMS: Calcd for  $\text{C}_{12}\text{H}_{23}\text{NO}_6\text{Na}$   $[\text{M}+\text{Na}]^+$ , 300.1418; Found, 300.1415. HPLC: 96.9% (method A,  $t_{\text{R}} = 10.93$  min).

**(3R,4S,5S,6R)-1-Butyl-3,4,5,6-tetrahydroxyazepan-2-one (10c).** Compound **10c** was prepared from compound **9c** as described in the preparation of compound **7a**, yielding **10c** (98% yield) as a colorless oil:  $^1\text{H}$  NMR (300 MHz,  $\text{D}_2\text{O}$ )  $\delta$  0.73 (t,  $J =$

7.2 Hz, 3H), 1.05-1.15 (m, 2H), 1.31-1.41 (m, 2H), 2.88 (m, 1H), 3.24 (m, 1H), 3.39-3.73 (m, 5H), 4.40 (d,  $J = 8.4$  Hz, 1H);  $^{13}\text{C}$  NMR (75 MHz,  $\text{D}_2\text{O}$ )  $\delta$  13.7, 20.0, 29.5, 48.0, 50.7, 63.0, 69.3, 70.2, 73.4, 173.4; HRMS: Calcd for  $\text{C}_{10}\text{H}_{20}\text{NO}_5$   $[\text{M}+\text{H}]^+$ , 234.1336; Found, 234.1330. HPLC: 97.1% (method A,  $t_{\text{R}} = 12.53$  min).

**(3R,4S,5S,6R)-1-Nonyl-3,4,5,6-tetrahydroazepan-2-one (10d)**. Compound **10d** was prepared from compound **9d** as described in the preparation of compound **7a**, yielding **10d** (95% yield) as an amorphous solid after lyophilization;  $^1\text{H}$  NMR (300 MHz,  $\text{CD}_3\text{OD}$ )  $\delta$  0.89 (t,  $J = 6.9$  Hz, 3H), 1.29 (s, 12H), 1.50-1.59 (m, 2H), 3.07 (brs, 1H), 3.61 (brs, 1H), 3.76-3.85 (m, 5H), 4.46 (d,  $J = 9.0$  Hz, 1H);  $^{13}\text{C}$  NMR (75 MHz,  $\text{CD}_3\text{OD}$ )  $\delta$  14.4, 23.7, 27.9, 28.6, 30.4, 30.5, 30.7, 33.0, 48.1, 51.5, 68.7, 70.4, 70.8, 74.6, 174.0; HRMS: Calcd for  $\text{C}_{15}\text{H}_{29}\text{NO}_5\text{Na}$   $[\text{M}+\text{Na}]^+$ , 326.1938; Found, 326.1936. HPLC: 98.0% (method A,  $t_{\text{R}} = 28.02$  min).

**(3S,4S,5R,6R)-3,4,5-Tris(benzyloxy)-6-hydroxy-1-(2-hydroxyethyl)azepan-2-one (12a)**. Compound **12a** was prepared from compound **11**<sup>1</sup> as described in the preparation of **6a**. Yield: 83% as colorless oil after column chromatography (petroleum ether-ethyl acetate, 1:1).  $^1\text{H}$  NMR (300 MHz,  $\text{CDCl}_3$ )  $\delta$  2.97 (brs, 2H), 3.47-3.81 (m, 6H), 4.10 (m, 3H), 4.42-4.98 (m, 7H), 7.18 (m, 2H), 7.30-7.37 (m, 13H);  $^{13}\text{C}$  NMR (75 MHz,  $\text{CDCl}_3$ )  $\delta$  49.5, 52.8, 61.1, 72.6, 73.4, 127.7, 127.8, 127.9, 128.1, 128.3, 128.3, 128.5, 137.4, 137.7, 170.4; HRMS: Calcd for  $\text{C}_{29}\text{H}_{34}\text{NO}_6$   $[\text{M}+\text{H}]^+$ , 492.2381; Found, 492.2391.

**(3S,4S,5R,6R)-3,4,5-Tris(benzyloxy)-6-hydroxy-1-butylazepan-2-one (12c)**. Compound **12c** was prepared from compound **11** as described in the preparation of **6a**. Yield: 90% as colorless oil after column chromatography (petroleum ether-ethyl acetate, 4:1).  $^1\text{H}$  NMR (300 MHz,  $\text{CDCl}_3$ )  $\delta$  0.89 (t,  $J = 6.9$  Hz, 3H), 1.25-1.37 (m, 2H), 1.46-1.55 (m, 2H), 2.38 (d,  $J = 9.0$  Hz, 1H), 2.98 (m, 1H), 3.27-3.33 (m, 1H), 3.60-3.67 (m, 2H), 3.77-3.84 (m, 2H), 4.06 (d,  $J = 4.5$  Hz, 1H), 4.36-4.46 (m, 2H), 4.56-4.67 (m, 3H), 4.88-4.99 (m, 2H), 7.15-7.41 (m, 15H);  $^{13}\text{C}$  NMR (75 MHz,  $\text{CDCl}_3$ )  $\delta$  13.8, 20.0, 30.1, 48.3, 48.5, 67.3, 72.4, 72.8, 73.4, 77.3, 78.6, 127.55, 127.64, 127.9, 128.0, 128.2, 128.3, 128.6, 137.2, 138.0, 138.2, 168.8; Anal. Calcd for

$C_{31}H_{37}NO_5$ : C, 73.93; H, 7.41; N, 2.78; Found: C, 73.74; H, 7.51; N, 2.66; ESI-MS: 504  $[M+H]^+$ .

**(3S,4S,5R,6R)-3,4,5-Tris(benzyloxy)-6-hydroxy-1-nonylazepan-2-one (12d).**

Compound **12d** was prepared from compound **11** as described in the preparation of **6a**. Yield: 89% as colorless oil after column chromatography (petroleum ether-ethyl acetate, 6:1).  $^1H$  NMR (300 MHz,  $CDCl_3$ )  $\delta$  0.87 (t,  $J = 6.6$  Hz, 3H), 1.24 (s, 12H), 1.49-1.54 (m, 2H), 2.41 (s, 1H), 2.96 (m, 1H), 3.26-3.31 (m, 1H), 3.58-3.71 (m, 2H), 3.76-3.84 (m, 2H), 4.05 (d,  $J = 4.8$  Hz, 1H), 4.38 (d,  $J = 12.0$  Hz, 2H), 4.55-4.69 (m, 3H), 4.88-4.99 (m, 2H), 7.13-7.20 (m, 2H), 7.26-7.41 (m, 13H);  $^{13}C$  NMR (75 MHz,  $CDCl_3$ )  $\delta$  14.03, 22.2, 26.7, 28.0, 29.2, 29.3, 29.4, 31.8, 48.2, 48.7, 67.2, 72.2, 72.7, 73.3, 77.2, 127.5, 127.6, 127.8, 127.9, 128.1, 128.2, 128.5, 137.1, 137.9, 138.1, 168.7; HRMS: Calcd for  $C_{36}H_{48}NO_5$   $[M+H]^+$ , 574.3528; Found, 574.3532.

**(3S,4S,5R,6R)-1-(4-Methoxybenzyl)-3,4,5-tris(benzyloxy)-6-hydroxyazepan-2-one (12e).**

Compound **12e** was prepared from compound **11** as described in the preparation of **6a**. Yield: 89% as colorless oil after column chromatography (petroleum ether-ethyl acetate, 3:1).  $^1H$  NMR (300 MHz,  $CDCl_3$ )  $\delta$  2.18 (brs, 1H), 2.92 (brs, 1H), 3.50-3.79 (m, 3H), 3.75 (s, 3H), 4.08 (d,  $J = 4.8$  Hz, 1H), 4.20-4.25 (m, 1H), 4.36-4.46 (m, 2H), 4.55-4.64 (m, 2H), 4.73 (s, 1H), 4.94-5.07 (m, 3H), 6.67 (d,  $J = 8.1$  Hz, 2H), 7.15-7.18 (m, 4H), 7.30-7.43 (m, 13H);  $^{13}C$  NMR (75 MHz,  $CDCl_3$ )  $\delta$  47.6, 51.02, 55.1, 66.8, 72.4, 72.8, 73.6, 77.8, 113.7, 127.6, 127.7, 127.9, 128.2, 128.3, 128.6, 129.2, 129.7, 137.1, 137.9, 138.1, 158.9, 169.2; Anal. Calcd for  $C_{35}H_{37}NO_6$ : C, 74.05; H, 6.57; N, 2.47; Found: C, 73.82; H, 6.56; N, 2.45; ESI-MS: 568  $[M+H]^+$ .

**(3S,4S,5R,6R)-3,4,5,6-Tetrahydroxy-1-(2-hydroxyethyl)azepan-2-one (13a).**

Compound **13a** was prepared from compound **12a** as described in the preparation of compound **7a**, yielding **13a** (95% yield) as a colorless oil:  $^1H$  NMR (300 MHz,  $D_2O$ )  $\delta$  2.89-2.93 (m, 1H), 3.27-3.35 (m, 1H), 3.39-3.62 (m, 4H), 3.74-3.89 (m, 3H), 4.73 (s, 1H);  $^{13}C$  NMR (75 MHz,  $D_2O$ )  $\delta$  48.1, 51.5, 59.6, 66.5, 69.2, 72.3, 75.5, 173.8; HRMS: Calcd for  $C_8H_{16}NO_6$   $[M+H]^+$ , 244.0792; Found, 244.0791. HPLC: 99.9% (method A,  $t_R = 2.54$  min).

**(3*S*,4*S*,5*R*,6*R*)-1-Butyl-3,4,5,6-tetrahydroazepan-2-one (13c).** Compound **13c** was prepared from compound **12c** as described in the preparation of compound **7a**, yielding **13c** (97% yield) as a colorless oil:  $^1\text{H}$  NMR (300MHz,  $\text{CD}_3\text{OD}$ )  $\delta$  0.94 (t,  $J = 7.2$  Hz, 3H), 1.29-1.40 (m, 2H), 1.50-1.60 (m, 2H), 2.85-2.90 (m, 1H), 3.45 (t,  $J = 7.2$  Hz, 2H), 3.75-3.79 (m, 1H), 3.91-3.99 (m, 3H), 4.71 (s, 1H);  $^{13}\text{C}$  NMR (75 MHz,  $\text{CD}_3\text{OD}$ )  $\delta$  14.2, 21.0, 31.0, 48.30, 49.8, 68.1, 70.1, 73.7, 76.8, 173.7; HRMS: Calcd for  $\text{C}_{10}\text{H}_{20}\text{NO}_5$   $[\text{M}+\text{H}]^+$ , 234.1336; Found, 234.1332. HPLC: 99.0% (method A,  $t_{\text{R}} = 12.45$  min).

**(3*S*,4*S*,5*R*,6*R*)-1-Nonyl-3,4,5,6-tetrahydroazepan-2-one (13d).** Compound **13d** was prepared from compound **12d** as described in the preparation of compound **7a**, yielding **13d** (98% yield) as a colorless oil:  $^1\text{H}$  NMR (300 MHz,  $\text{CD}_3\text{OD}$ )  $\delta$  0.89 (t,  $J = 6.9$  Hz, 3H), 1.29 (s, 12H), 1.53-1.59 (m, 2H), 2.85-2.90 (m, 1H), 3.42-3.47 (m, 2H), 3.76-3.79 (m, 1H), 3.91-3.99 (m, 3H), 4.71 (s, 1H);  $^{13}\text{C}$  NMR (75 MHz,  $\text{CD}_3\text{OD}$ )  $\delta$  14.5, 23.7, 27.8, 28.8, 30.4, 30.6, 30.7, 33.1, 48.3, 50.2, 68.1, 70.1, 73.7, 76.8, 173.7; HRMS: Calcd for  $\text{C}_{15}\text{H}_{30}\text{NO}_5$   $[\text{M}+\text{H}]^+$ , 304.2118; Found, 304.2123. HPLC: 100.0% (method A,  $t_{\text{R}} = 27.64$  min).

**(3*S*,4*S*,5*R*,6*R*)-1-(4-Methoxybenzyl)-3,4,5,6-tetrahydroazepan-2-one (13e).** Compound **13e** was prepared from compound **12e** as described in the preparation of compound **7a**, yielding **13e** (98% yield) as an amorphous solid after lyophilization.  $^1\text{H}$  NMR (300MHz,  $\text{CD}_3\text{OD}$ )  $\delta$  2.85-2.90 (m, 1H), 3.28-3.34 (m, 2H), 3.60-3.63 (m, 1H), 3.76 (s, 3H), 3.77-3.98 (m, 3H), 4.60 (s, 1H), 6.87 (d,  $J = 8.4$  Hz, 2H), 7.23 (d,  $J = 8.7$  Hz, 2H);  $^{13}\text{C}$  NMR(75 MHz,  $\text{CD}_3\text{OD}$ )  $\delta$  48.1, 52.8, 56.2, 68.2, 70.9, 74.2, 77.6, 115.6, 130.5, 131.2, 161.3, 174.9; HRMS: Calcd for  $\text{C}_{14}\text{H}_{19}\text{NO}_6\text{Na}$   $[\text{M}+\text{Na}]^+$ , 320.1105; Found, 320.1101. HPLC: 98.0% (method A,  $t_{\text{R}} = 13.65$  min).

**(3*R*,4*R*,5*R*,6*S*)-4,5,6-Tris(benzyloxy)-1-butylazepan-3-yl benzoate (15c).**  $\text{BH}_3$ -THF (1 M, 0.4 mL, 0.40 mmol) was added dropwise to the solution of lactam **14c** (61 mg, 0.10 mmol) in anhydrous THF (10 mL) at 0 °C under nitrogen, and after stirring for 20 min at room temperature, the solution was heated under reflux for 4 h. Then the mixture was cooled to 0 °C, 6N HCl (1 mL) was added dropwise until no further

evolution of gas occurred. After heating under reflux for 30 min, the mixture was concentrated under reduced pressure. This acidic residue was diluted with water, basified with solid NaOH and then extracted with CH<sub>2</sub>Cl<sub>2</sub> (50 mL). The combined organic phase was washed by water (15 mL ×2), dried, concentrated and the residue was purified by column chromatography (petroleum ether-ethyl acetate, 3:1) on silica gel to provide compound **15c** (56 mg, 94%) as colorless and amorphous solids. <sup>1</sup>H NMR (500 MHz, CDCl<sub>3</sub>) δ 0.88 (t, *J* = 7.0 Hz, 3H), 1.26-1.33 (m, 2H), 1.35-1.43 (m, 2H), 2.49-2.58 (m, 2H), 2.79 (dd, *J* = 1.5, 14.0 Hz, 1H), 2.86 (dd, *J* = 4.0, 12.5 Hz, 1H), 2.95 (dd, *J* = 10.0, 14.0 Hz, 1H), 3.09 (dd, *J* = 8.0, 12.0 Hz, 1H), 3.73-3.77 (m, 1H), 3.90 (dd, *J* = 5.0, 6.5 Hz, 1H), 3.96 (d, *J* = 5.0 Hz, 1H), 4.62-4.71 (m, 6H), 5.47-5.50 (m, 1H), 7.23-7.36 (m, 15H), 7.42-7.45 (m, 2H), 7.54-7.58 (m, 1H), 8.00-8.02 (m, 2H); <sup>13</sup>C NMR (125 MHz, CDCl<sub>3</sub>) δ 14.0, 20.4, 29.7, 53.7, 54.5, 56.9, 72.4, 72.5, 72.6, 73.4, 79.8, 82.8, 82.9, 127.5, 127.6, 127.8, 127.9, 128.0, 128.3, 128.4, 129.7, 130.4, 133.0, 138.2, 138.5, 138.6, 165.5; HRMS: Calcd for C<sub>38</sub>H<sub>44</sub>NO<sub>5</sub> [M+H]<sup>+</sup>, 594.3214; Found, 594.3216.

**(3R,4R,5R,6S)-1-Butyl-tetrahydroxyazepane (7c')**. Compound **15c** (52 mg, 0.088 mmol) was dissolved in methanol (10 mL), to which NaOMe (1 M solution in methanol, 1 mL, 1 mmol) was added and the resulting solution was stirred for 30 min at room temperature. Dowex 50w H<sup>+</sup> resin was added to neutralize the solution (pH = 7), after which the resin was removed by filtration and washed with ethyl acetate. The solvent was removed on a rotary evaporator and the residue was purified by column chromatography on silica gel (petroleum ether-ethyl acetate, 3:1) to afford a colorless oil. The oil was dissolved in THF-H<sub>2</sub>O-HOAc (4:2:1, 7 mL), and 10% Pd-C (10.0 mg) was added. The mixture was stirred under hydrogen atmosphere (4 atm) for 48 h. The catalyst was then removed by filtration through Celite, and the filtrate was concentrated. The residue was subjected to a C-18 reversed-phase column chromatography (eluent, H<sub>2</sub>O) to give **7c'** (22 mg, 92%) as an amorphous solid after lyophilization in the form of acetic acid salt. <sup>1</sup>H NMR (300 MHz, D<sub>2</sub>O): δ 0.76 (t, *J* = 7.2 Hz, 3H), 1.14-1.26 (m, 2H), 1.50-1.60 (m, 2H), 1.74 (s, 3H), 3.07 (t, *J* = 8.1 Hz,

2H), 3.19 (t,  $J = 14.4$  Hz, 2H), 3.31-3.40 (m, 2H), 3.57-3.64 (m, 2H), 3.78 (t,  $J = 6.6$  Hz, 1H), 4.10 (d,  $J = 5.7$  Hz, 1H);  $^{13}\text{C}$  NMR (75 MHz,  $\text{D}_2\text{O}$ )  $\delta$  13.3, 19.7, 26.1, 54.8, 55.0, 59.2, 67.3, 68.2, 74.8, 75.5; HRMS: Calcd for  $\text{C}_{10}\text{H}_{21}\text{NO}_4\text{Na}$   $[\text{M}+\text{Na}]^+$ , 242.1363; Found, 242.1364. HPLC: 97.9% (method B,  $t_{\text{R}} = 3.03$  min).

**(3R,4S,5R,6S)-4,5,6-Tris(benzyloxy)-1-butylazepan-3-yl benzoate (16c).**

Compound **16c** was prepared from compound **9c** as described in the preparation of **15c**. Yield: 92% as colorless oil after column chromatography (petroleum ether-ethyl acetate, 3:1).  $^1\text{H}$  NMR (300 MHz,  $\text{CDCl}_3$ )  $\delta$  0.78 (t,  $J = 7.2$  Hz, 3H), 1.26-1.36 (m, 4H), 2.53 (t,  $J = 7.2$  Hz, 2H), 2.79 (dd,  $J = 3.0, 14.4$  Hz, 1H), 2.97-3.04 (m, 3H), 3.57-3.59 (m, 1H), 4.10 (dd,  $J = 6.0, 14.4$  Hz, 1H), 4.39 (d,  $J = 7.2$  Hz, 1H), 4.50-4.66 (m, 5H), 4.76 (d,  $J = 12.0$  Hz, 1H), 5.32-5.34 (m, 1H), 7.19-7.55 (m, 18H), 7.99-8.02 (m, 2H);  $^{13}\text{C}$  NMR (75 MHz,  $\text{CDCl}_3$ )  $\delta$  13.9, 20.2, 29.5, 58.4, 58.6, 59.5, 71.4, 72.6, 73.1, 76.0, 77.8, 79.4, 79.7, 127.36, 127.45, 127.51, 127.6, 127.8, 128.2, 128.3, 129.7, 130.5, 132.8, 138.47, 138.51, 138.7, 166.1; HRMS: Calcd for  $\text{C}_{38}\text{H}_{44}\text{NO}_5$   $[\text{M}+\text{H}]^+$ , 594.3214; Found, 594.3221.

**(3R,4S,5R,6S)-1-Butyl-tetrahydroxyazepane (10c')**. Compound **10c'** was prepared from compound **16c** as described in the preparation of **7c'**, providing compound **10c'** as an amorphous solid after lyophilization in the form of acetic acid salt. Yield: 95% after two steps.  $^1\text{H}$  NMR (300 MHz,  $\text{D}_2\text{O}$ ):  $\delta$  0.75 (t,  $J = 7.2$  Hz, 3H), 1.12-1.25 (m, 2H), 1.46-1.57 (m, 2H), 1.73 (s, 3H), 2.93-2.98 (m, 2H), 3.12 (dd,  $J = 4.8, 13.8$  Hz, 2H), 3.28 (dd,  $J = 2.7, 14.1$  Hz, 2H), 3.88-3.94 (m, 4H);  $^{13}\text{C}$  NMR (75 MHz,  $\text{D}_2\text{O}$ )  $\delta$  13.4, 19.9, 23.8, 26.2, 57.3, 59.9, 67.7, 73.0; HRMS: Calcd for  $\text{C}_{10}\text{H}_{21}\text{NO}_4\text{Na}$   $[\text{M}+\text{Na}]^+$ , 242.1363; Found, 242.1363. HPLC: 98.3% (method B,  $t_{\text{R}} = 3.09$  min).

**(3R,4S,5R,6R)-1-Benzyl-3,4,5-tris(benzyloxy)-6-hydroxyazepan-2-one (17).**

Compound **17** was prepared from compound **4** as described in the preparation of **6a**. Yield: 92% as colorless oil after column chromatography (petroleum ether-ethyl acetate, 4:1).  $^1\text{H}$  NMR (300 MHz,  $\text{CDCl}_3$ )  $\delta$  2.54 (d,  $J = 8.1$  Hz, 1H), 3.24 (d,  $J = 14.4$  Hz, 1H), 3.61-3.64 (m, 2H), 3.74 (m, 1H), 3.96 (t,  $J = 5.7$  Hz, 1H), 4.25-4.31 (m, 2H), 4.37 (d,  $J = 6.0$  Hz, 1H), 4.42-4.51 (m, 2H), 4.64-4.71 (m, 2H), 4.80 (d,  $J = 11.7$  Hz,

1H), 4.89 (d,  $J = 14.4$  Hz, 1H), 7.17-7.33 (m, 20H);  $^{13}\text{C}$  NMR (75 MHz,  $\text{CDCl}_3$ )  $\delta$  48.3, 51.9, 67.4, 72.5, 73.2, 73.6, 79.9, 81.8, 127.5, 127.8, 127.9, 128.0, 128.1, 128.40, 128.44, 128.5, 137.3, 137.6, 137.7, 169.2; HRMS: Calcd for  $\text{C}_{34}\text{H}_{36}\text{NO}_5$   $[\text{M}+\text{H}]^+$ , 538.2588; Found, 538.2581.

**(3R,4R,5R,6S)-1-Benzyl-4,5,6-tris(benzyloxy)azepan-3-yl benzoate (18).**

Compound **18** was prepared from compound **17** as described in the preparation of **15c**. Yield: 86% after two steps as colorless oil after column chromatography (petroleum ether-ethyl acetate, 3:1).  $^1\text{H}$  NMR (300 MHz,  $\text{CDCl}_3$ )  $\delta$  2.78-2.82 (m, 1H), 2.89-2.95 (m, 2H), 3.13 (dd,  $J = 8.4, 12.3$  Hz, 1H), 3.64 (d,  $J = 13.5$  Hz, 1H), 3.72-3.81 (m, 2H), 3.89 (t,  $J = 4.8$  Hz, 1H), 3.99 (d,  $J = 4.8$  Hz, 1H), 4.36 (ABq,  $J = 11.4$  Hz, 2H), 4.61-4.72 (m, 4H), 5.56 (dd,  $J = 3.9, 7.5$  Hz, 1H), 7.18-7.36 (m, 20H), 7.42 (t,  $J = 7.5$  Hz, 2H), 7.56 (t,  $J = 7.5$  Hz, 2H), 7.99 (d,  $J = 7.5$  Hz, 1H);  $^{13}\text{C}$  NMR (75 MHz,  $\text{CDCl}_3$ )  $\delta$  52.5, 54.7, 61.7, 71.9, 72.5, 72.6, 73.4, 79.9, 82.6, 83.2, 127.1, 127.5, 127.6, 127.75, 127.80, 128.0, 128.3, 128.8, 129.7, 130.3, 133.0, 138.1, 138.4, 138.5, 139.0, 165.4; HRMS: Calcd for  $\text{C}_{41}\text{H}_{42}\text{NO}_5$   $[\text{M}+\text{H}]^+$ , 628.3057; Found, 628.3057.

**(3R,4R,5R,6S)-3,4,5,6-Tetrahydroxyazepane (19).** Compound **18** (50 mg, 79.6  $\mu\text{mol}$ ) was dissolved in methanol (10 mL), to which NaOMe (1 M solution in methanol, 1 mL, 1 mmol) was added and the resulting solution was stirred for 30 min at room temperature. Dowex 50w  $\text{H}^+$  resin was added to neutralize the solution ( $\text{pH} = 7$ ), after which the resin was removed by filtration and washed with ethyl acetate. The solvent was removed on a rotary evaporator and the residue was purified by column chromatography on silica gel (petroleum ether-ethyl acetate, 3:1) to afford a colorless oil (42 mg). This oil was dissolved in methanol (5 mL), and 10% Pd-C (10.0 mg) was added. To the solution 2N HCl was added dropwise to adjust  $\text{pH} = 2$ . The mixture was stirred under hydrogen atmosphere (4 atm) for 48 h. The catalyst was then removed by filtration through Celite, and the filtrate was concentrated. The residue was subjected to a C-18 reversed-phase column chromatography (eluent,  $\text{H}_2\text{O}$ ) to give compound **19** (14 mg, 92%) as an amorphous solid after lyophilization in the form of hydrochloride salt.  $^1\text{H}$  NMR (300 MHz,  $\text{D}_2\text{O}$ )  $\delta$  3.08-3.32 (m, 4H), 3.59-3.67 (m, 2H),

3.76-3.81 (m, 1H), 4.12 (d,  $J = 6.6$  Hz, 1H);  $^{13}\text{C}$  NMR (75 MHz,  $\text{D}_2\text{O}$ )  $\delta$  46.7, 46.9, 67.7, 68.6, 75.2, 75.7. The spectroscopic data of compounds **19** coincided with those reported in the literature.<sup>2</sup>

**(3R,4R,5R,6R)-1-(4-Methoxybenzyl)-4,5,6-tris(benzyloxy)azepan-3-yl benzoate (20)**. Compound **20** was prepared from compound **12e** as described in the preparation of **15c**. Yield: 70% after two steps as colorless oil after column chromatography (petroleum ether-ethyl acetate, 3:1).  $^1\text{H}$  NMR (300 MHz,  $\text{CDCl}_3$ )  $\delta$  2.78-2.90 (m, 2H), 2.99 (dd,  $J = 7.8, 12.9$  Hz, 1H), 3.13 (dd,  $J = 7.8, 12.9$  Hz, 1H), 3.67 (s, 2H), 3.76 (s, 3H), 4.04-4.12 (m, 3H), 4.49-4.79 (m, 6H), 5.62-5.67 (m, 1H), 6.74 (d,  $J = 9.0$  Hz, 2H), 7.19 (d,  $J = 8.4$  Hz, 2H), 7.24-7.37 (m, 15H), 7.41 (t,  $J = 7.8$  Hz, 2H), 7.55 (t,  $J = 7.5$  Hz, 1H), 7.97 (d,  $J = 7.2$  Hz, 1H);  $^{13}\text{C}$  NMR (75 MHz,  $\text{CDCl}_3$ )  $\delta$  53.07, 53.42, 55.18, 61.79, 71.40, 71.87, 73.27, 73.32, 76.64, 79.05, 79.60, 113.52, 127.39, 127.42, 127.50, 127.72, 128.25, 129.66, 129.76, 130.40, 131.26, 132.85, 138.41, 138.62, 138.80, 158.54, 165.67; HRMS: Calcd for  $\text{C}_{42}\text{H}_{44}\text{NO}_6$  [ $\text{M}+\text{H}^+$ ], 658.3163; Found, 658.3168.

**(3R,4R,5R,6R)-3,4,5,6-Tetrahydroxyazepane (21)**. Compound **21** was prepared from compound **20** as described in the preparation of compound **19**, providing compound **21** as colorless oil in the form of hydrochloride salt. Yield: 91% after two steps;  $^1\text{H}$  NMR (300 MHz,  $\text{D}_2\text{O}$ )  $\delta$  3.25-3.27 (m, 4H), 3.71 (s, 2H), 4.16 (m, 2H);  $^{13}\text{C}$  NMR (75 MHz,  $\text{D}_2\text{O}$ )  $\delta$  45.7, 67.5, 73.8. The spectroscopic data of compounds **21** coincided with those reported in the literature.<sup>3</sup>

## Biology Section

**Cell culture.** HL60 cells and Gaucher lymphoblasts (N370S) were cultured in RPMI1640 medium supplemented with 10% or 15% (v/v) foetal bovine serum, respectively, 2 mM L-glutamine, 100 U/mL penicillin and 100 mg/mL streptomycin at 37 °C and 5 %  $\text{CO}_2$ .

**Cytotoxicity assay.** HL60 cells were seeded at densities of 500 cells / well in 96-well plates in 200  $\mu\text{L}$  of supplemented media containing either 0.01 % DMSO or water as



controls, and concentrations up to 250  $\mu\text{M}$  of each compound added for 3 days. Cell viability was assessed in triplicate using the Cell Titer-96 AQueous cellular proliferation assay kit according to manufacturer's (Promega, Southampton, UK) instructions.

**$\beta$ -Glucocerebrosidase inhibition assay.** Human placental  $\beta$ -glucocerebrosidase was isolated and partially purified from modified procedure of Furbish and co-workers.<sup>4</sup> Enzyme activity was measured in 50  $\mu\text{L}$  of 5 mM 4-methylumbelliferyl- $\beta$ -glucoside in 0.1 M citrate phosphate buffer, pH 5.2 containing 0.25% sodium taurocholate, 0.1 % TX100 at 37 °C for 15-60 min. The reaction was stopped by the addition of 200  $\mu\text{L}$  of 0.5 M sodium carbonate and the fluorescence measured at ex 350 nm, em 460 nm. Inhibition constants were generated for placental  $\beta$ -glucocerebrosidase ( $K_m$  for 4-MU- $\beta$ -glucoside,  $1.9 \pm 0.3$  mM) using 0.1 mM to 3 mM substrate concentrations for  $K_i$  determinations or 0.5 mM substrate for  $\text{IC}_{50}$  determinations.

**$\beta$ -Glucocerebrosidase activation assay.** HL60 cells and Gaucher lymphoblasts (N370S) were cultured in the presence of various concentrations of inhibitor (0-50  $\mu\text{M}$ ) for 3 days before  $\beta$ -glucocerebrosidase activity was measured. Cells were washed twice in phosphate buffered saline, homogenized in water using a small dounce homogenizer, centrifuged at 800g for 5 min and the supernatant taken for protein and  $\beta$ -glucocerebrosidase activity. Protein concentration was determined using the BCA assay (Pierce, UK) according to manufacturer's instructions. All enzyme activation measurements were made using aliquots of homogenate and 5 mM 4-methylumbelliferyl- $\beta$ -glucoside in 0.1 M citrate phosphate buffer, pH 5.2 containing 0.25% sodium taurocholate, 0.1 % TX100 as described above. Bromoconduritol (500  $\mu\text{M}$  - 2.5 mM) was added to some enzyme activity determinations to confirm the specific hydrolysis of substrate by  $\beta$ -glucocerebrosidase. Enzyme activation is defined as the fold increase in enzyme activity (U/mg protein) in treated cells compared to untreated cells. The activation of *N*-nonyl-DNJ in various concentrations is shown in the Supporting Information.

The activations of *N*-nonyl-DNJ in various concentrations for N370S GC is shown in Figure 1.

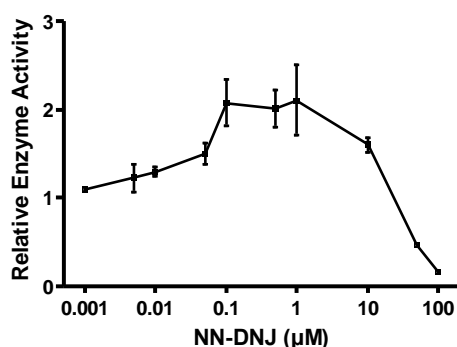

**Fig. 1.** The influence of *NN*-DNJ to  $\beta$ -glucocerebrosidase activities in N370S Gaucher lymphoblasts. The fold increase in enzyme activity is compared to untreated cells, i.e., normalised value = 1 and shown as relative enzyme activity. The mean and SD obtained from an experiment performed in triplicate are shown.

### Computer Section

Compound **7d** were flexibly docked into the binding site of GC (PDB code: 2V3E, chain B, complexed with *NN*-DNJ)<sup>5</sup> using AutoDock 3.05 program.<sup>6</sup> Default parameters were used as described in the AutoDock manual unless otherwise specified. The molecule was docked with 100 genetic algorithm runs of up to 250,000 energy evaluations in the docking study of compound **7d** with the binding site. Docking result with the lowest energy was then selected for further energy minimization, for the consideration of induced conformational changes in the amino acid side chains of the protein and an energy-optimum binding mode.

Energy minimization calculations were done within the Amber Molecular Dynamics Package version 8.0 with an Amber99 force field.<sup>7</sup> The geometries and partial atomic charges (AM1-BCC charges) for compound **7d** was computed using Divcon and Antechamber modules so as to obtain the molecular mechanical parameters of it. With the backbone atoms of the GlcCerases was fixed by a large constraint of 500 kcal mol<sup>-1</sup> Å<sup>-2</sup>, the selected docking complex of compound **7d**-GC was energetically minimized in Sander module with 500 steps of steepest descent minimization,

followed by 500 steps of conjugate gradient minimization. A cutoff of 12 Å was used for the Lennard-Jones interactions. The optimized docking complex was analyzed with in-house software and Pymol 0.99. The geometric criterion for the formation of H-bonds is common with a donor-acceptor distance less than 3.5 Å and the donor-H-acceptor angle larger than 120°.

### References:

- (1) R. Namme, T. Mitsugi, H. Takahashi, M. Shiro and S. Ikegami, *Tetrahedron* 2006, **62**, 9183-9192.
- (2) B. B. Lohray, Y. Jayamma and M. Chatterjee, *J. Org. Chem.* 1995, **60**, 5958-5960.
- (3) F. Moris-Varas, X. H. Qian and C.-H. Wong, *J. Am. Chem. Soc.* 1996, **118**, 7647-7652.
- (4) F. S. Furbish, H. E. Blair, J. Shiloach, P. G. Pentchev and R. O. Brady, *Proc. Natl. Acad. Sci. U. S. A.* 1977, **74**, 3560-3563.
- (5) B. Brumshtein, H. M. Greenblatt, T. D. Butters, Y. Shaaltiel, D. Aviezer, I. Silman, A. H. Futerman and J. L. Sussman, *J. Biol. Chem.* 2007, **282**, 29052-29058.
- (6) G. M. Morris, D. S. Goodsell, R. S. Halliday, R. Huey, W. E. Hart, R. K. Belew and A. J. Olson, *J. Comput. Chem.* 1998, **19**, 1639-1662.
- (7) D. A. Pearlman, D. A. Case, J. W. Caldwell, W. S. Ross, T. E. Cheatham, S. Debolt, D. Ferguson, G. Seibel and P. Kollman, *Comput. Phys. Commun.* 1995, **91**, 1-41.

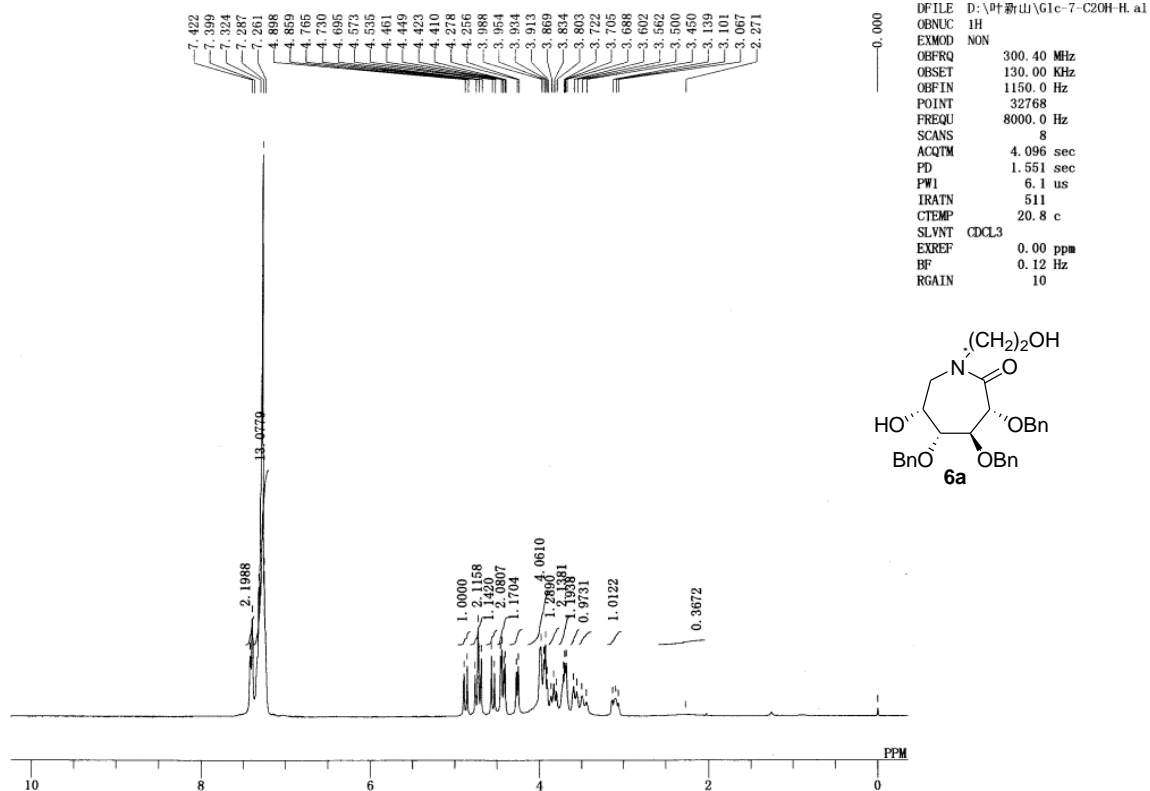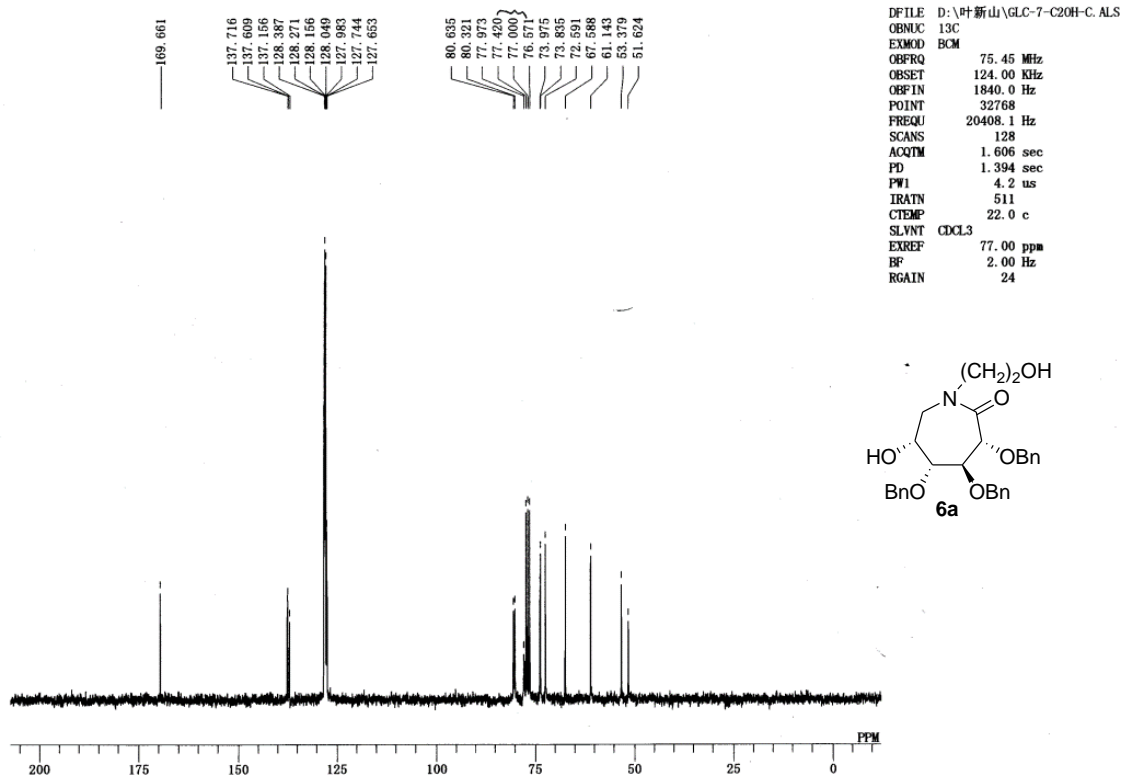

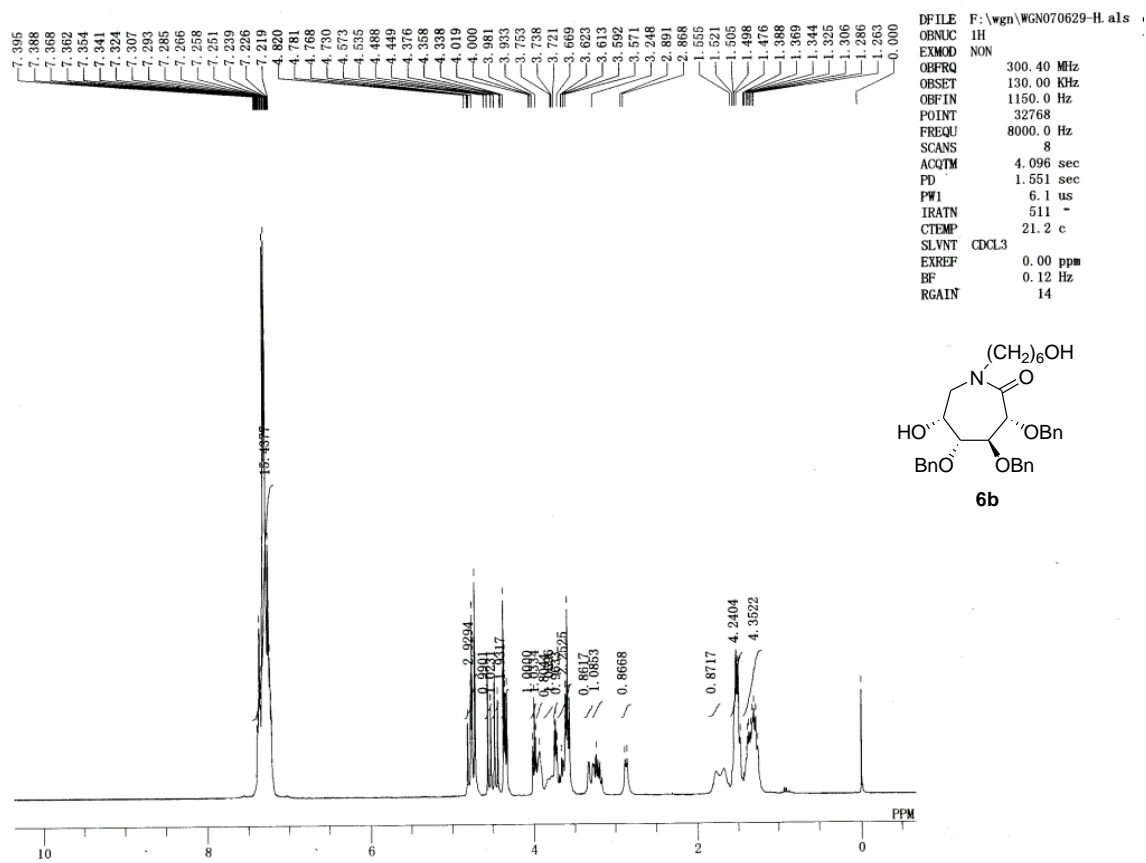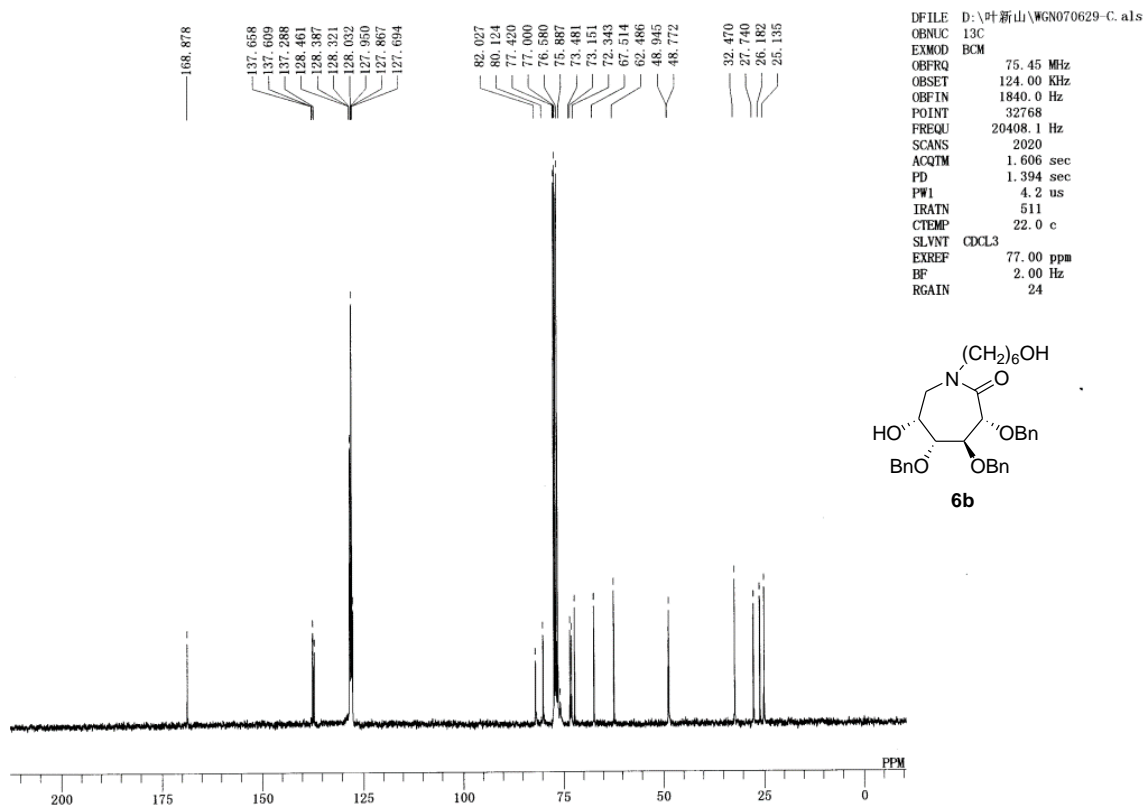

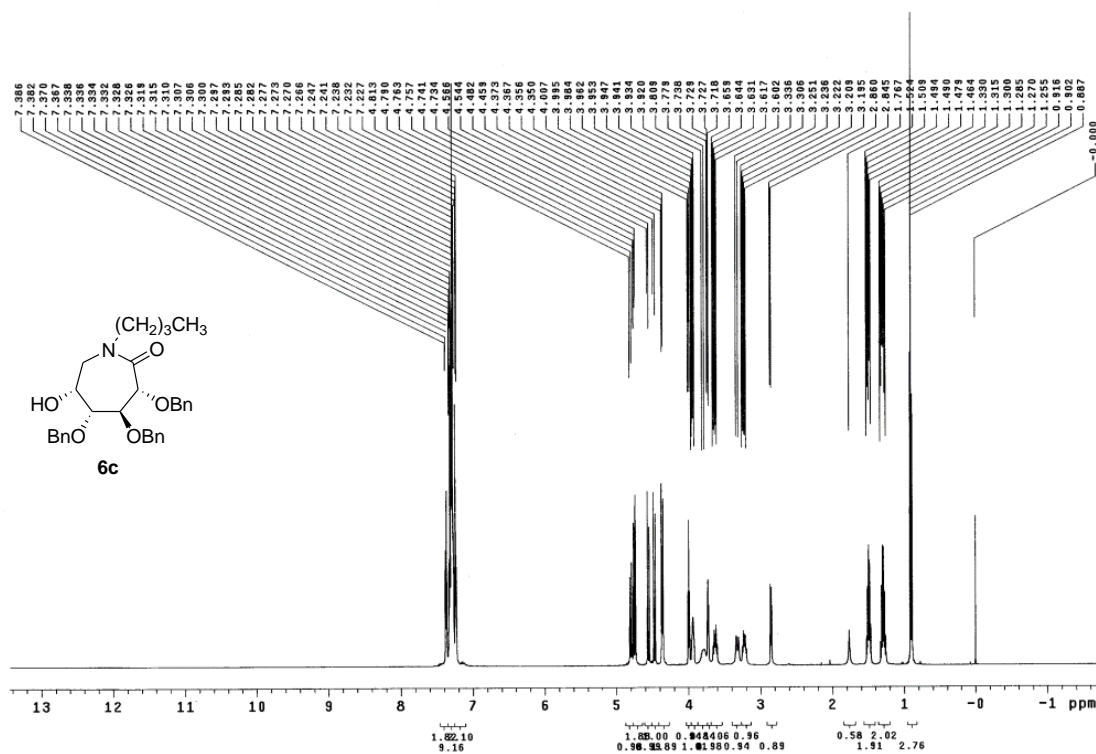

File: CARBON  
 Pulse Sequence: s2pu1  
 Solvent: CDCl3  
 Temp: 25.0 C / 298.1 K  
 User: 1-14-07  
 INOVA-500 "BHU500"

Relax. delay 1.000 sec  
 Pulse 84.3 degrees  
 Acq. time 1.000 sec  
 Width 31421.8 Hz  
 1664 repetitions  
 OBSERVE C13, 125.7004384 MHz  
 DECOUPLE H1, 499.9043860 MHz  
 Power 32 dB  
 continuously on  
 WALTZ-16 modulated  
 DATA PROCESSING  
 Line broadening 3.5 Hz  
 FT size 85536  
 Total time 7 hr, 8 min, 34 sec

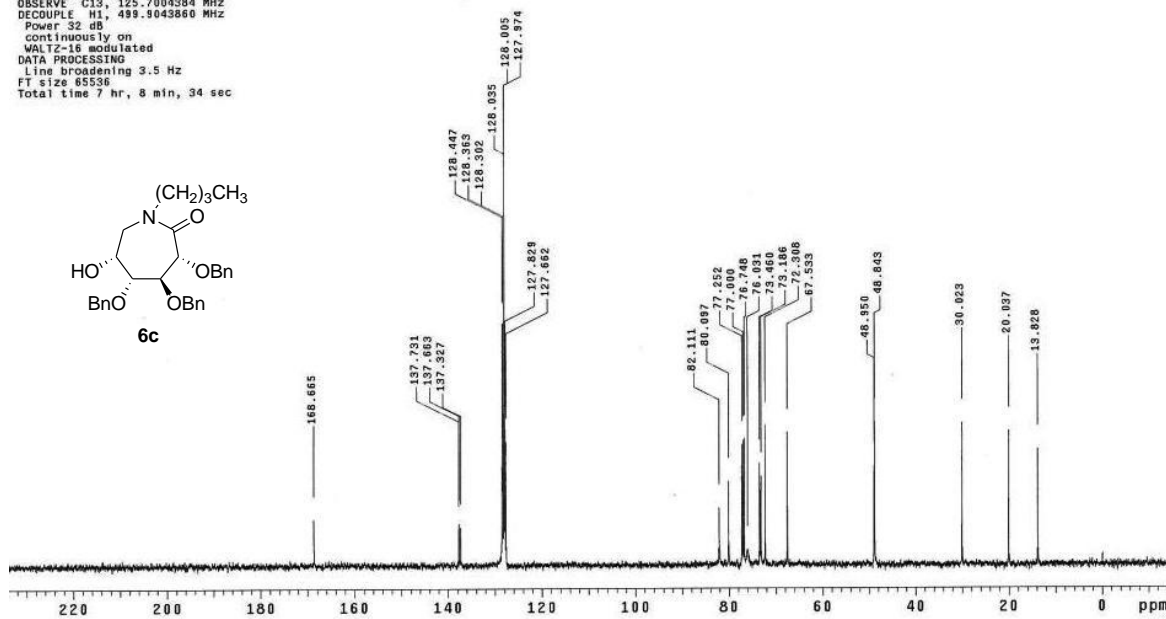

g1c-7-C4-2

File: PROTON  
Pulse Sequence: gCOSY  
Solvent: cdc13  
Temp.: 25.0 C / 298.1 K  
INNOVA-500 "8MUS500"  
Relax. delay 1.000 sec  
Acq. time 0.217 sec  
Width 4717.5 Hz  
2D Width 4717.5 Hz  
16 repetitions  
300 increments  
OBSERVE H1, 499.9019053 MHz  
DATA PROCESSING  
Sq. sine bell 0.109 sec  
F1 DATA PROCESSING  
Sq. sine bell 0.033 sec  
FT size 4096 x 4096  
Total time 1 hr, 41 min, 16 sec

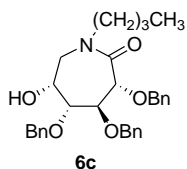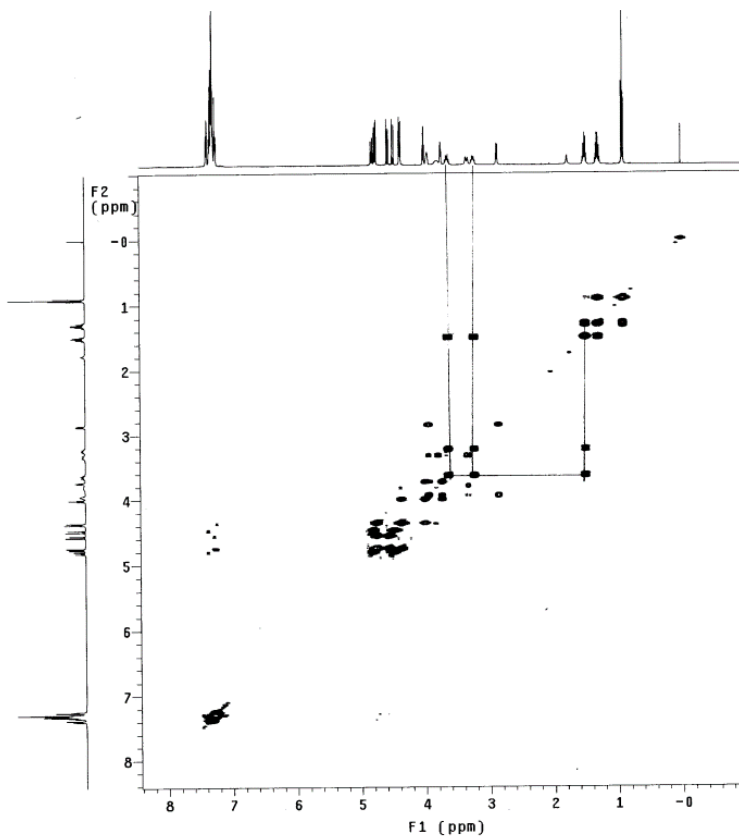

g1c-7-C4-2

File: PROTON  
Pulse Sequence: NOESY  
Solvent: cdc13  
Temp.: 25.0 C / 298.1 K  
INNOVA-500 "8MUS500"  
Relax. delay 1.000 sec  
Mixing 0.600 sec  
Acq. time 0.213 sec  
Width 4810.0 Hz  
2D Width 4810.0 Hz  
32 repetitions  
2 x 256 increments  
OBSERVE H1, 499.9019053 MHz  
DATA PROCESSING  
Gauss apodization 0.098 sec  
F1 DATA PROCESSING  
Gauss apodization 0.027 sec  
FT size 4096 x 4096  
Total time 8 hr, 28 min, 58 sec

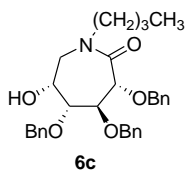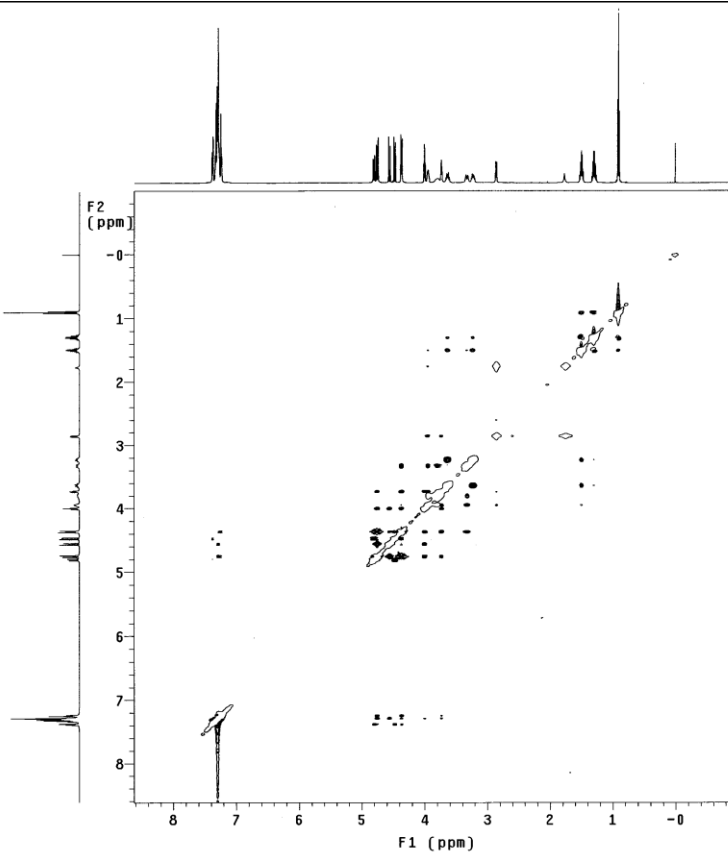

g1c-7-C4-2

File: PROTON

Pulse Sequence: gHSQC

Solvent: cdCl<sub>3</sub>  
Temp: 25.0 C / 298.1 K  
User: 1-14-87  
INOVA-500 "BMU500"

Relax. delay 1.000 sec  
Acq. time 0.217 sec  
Width 4710.9 Hz  
2D Width 21367.5 Hz  
16 repetitions  
2 x 128 increments  
OBSERVE H1, 499.9019053 MHz  
DECOUPLE C13, 125.7098268 MHz  
Power 49 dB  
on during acquisition  
off during delay  
GARP-1 modulated  
DATA PROCESSING  
Gauss apodization 0.100 sec  
F1 DATA PROCESSING  
Gauss apodization 0.003 sec  
FT size 2048 x 2048  
Total time 1 hr, 28 min, 40 sec

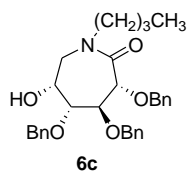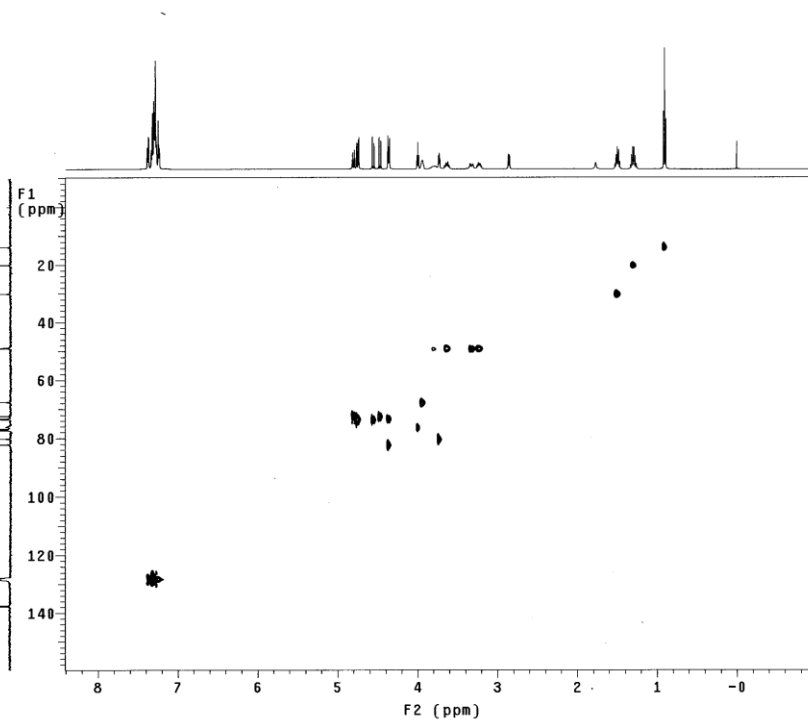

Pulse Sequence: gHMBC

Solvent: cdCl<sub>3</sub>  
Temp: 25.0 C / 298.1 K  
User: 1-14-87  
INOVA-500 "BMU500"

Relax. delay 1.000 sec  
Acq. time 0.217 sec  
Width 4723.9 Hz  
2D Width 30165.9 Hz  
24 repetitions  
400 increments  
OBSERVE H1, 499.9019053 MHz  
DATA PROCESSING  
Sine bell 0.108 sec  
F1 DATA PROCESSING  
Sine bell 0.007 sec  
FT size 2048 x 8192  
Total time 3 hr, 29 min, 31 sec

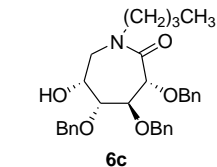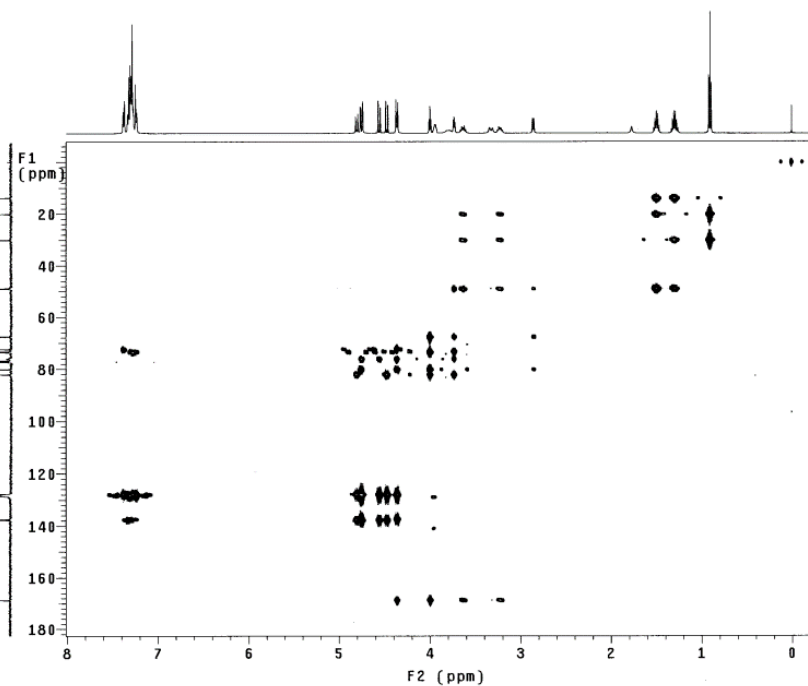



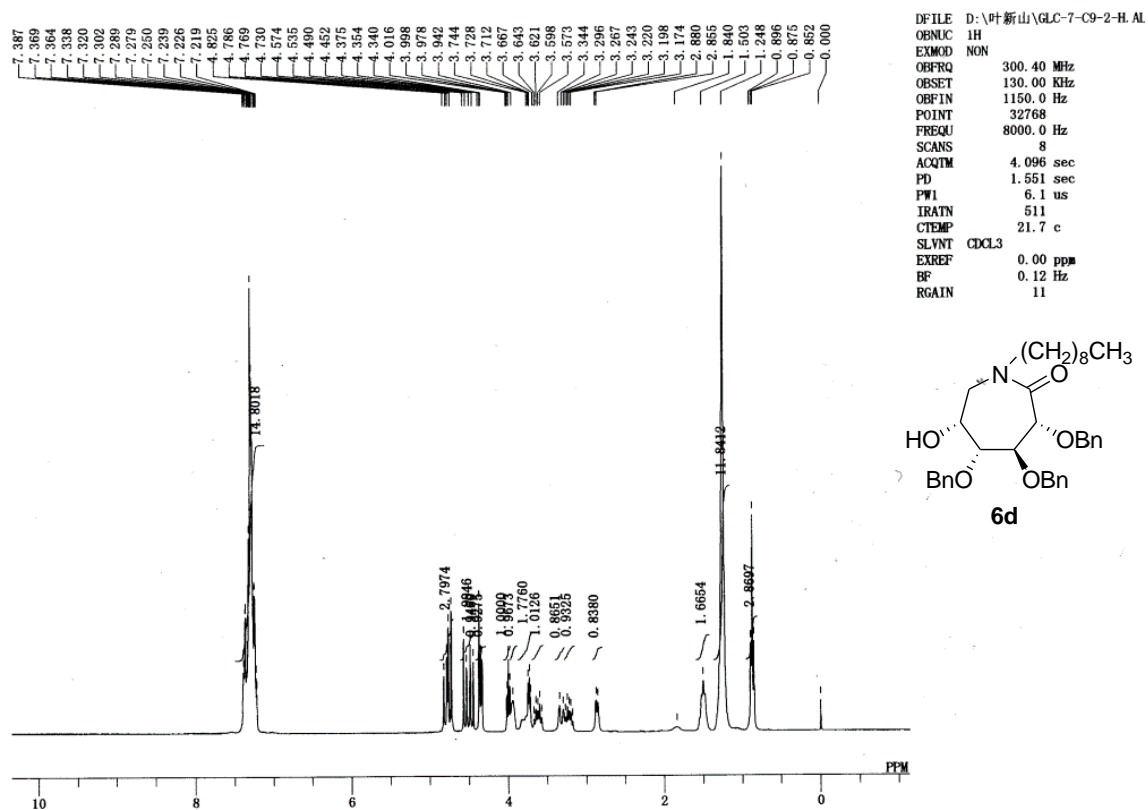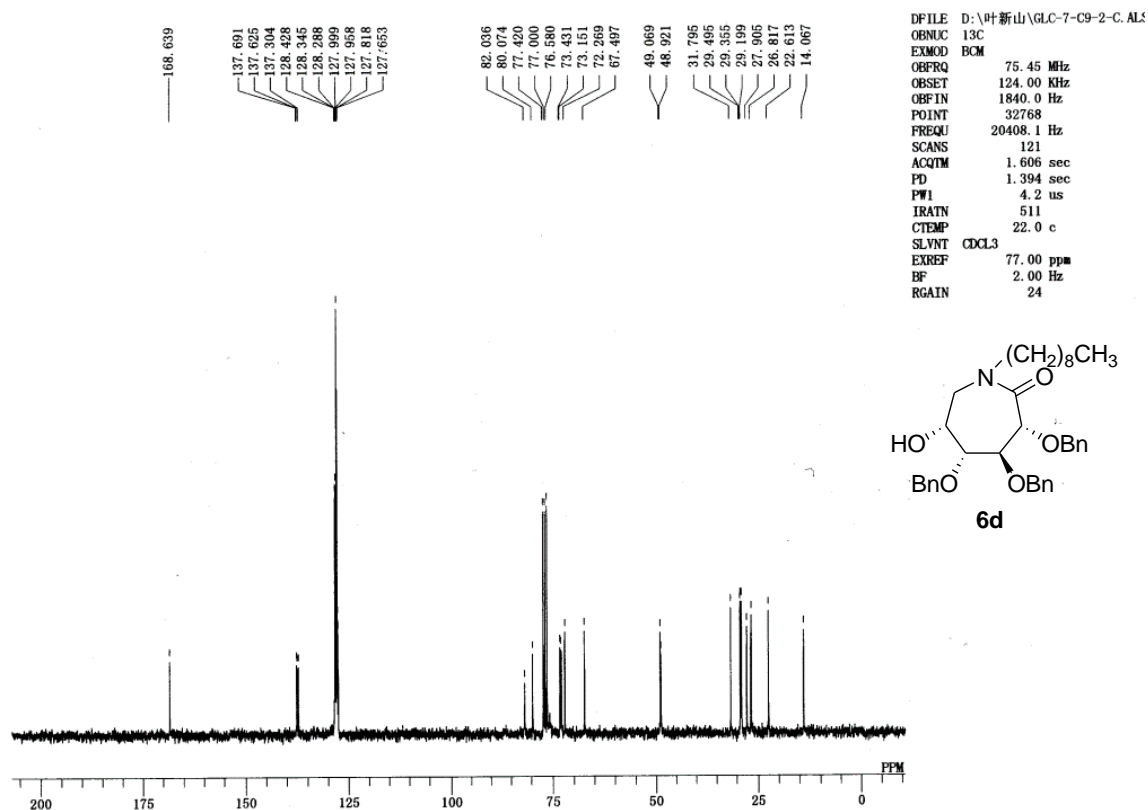

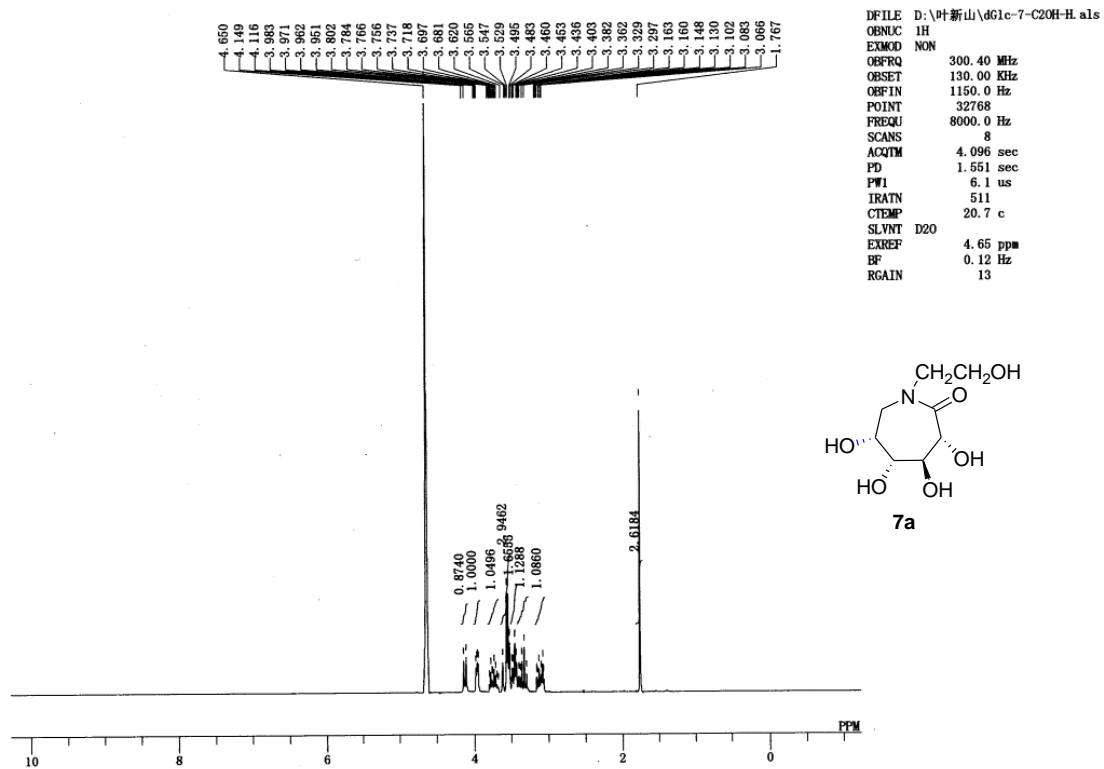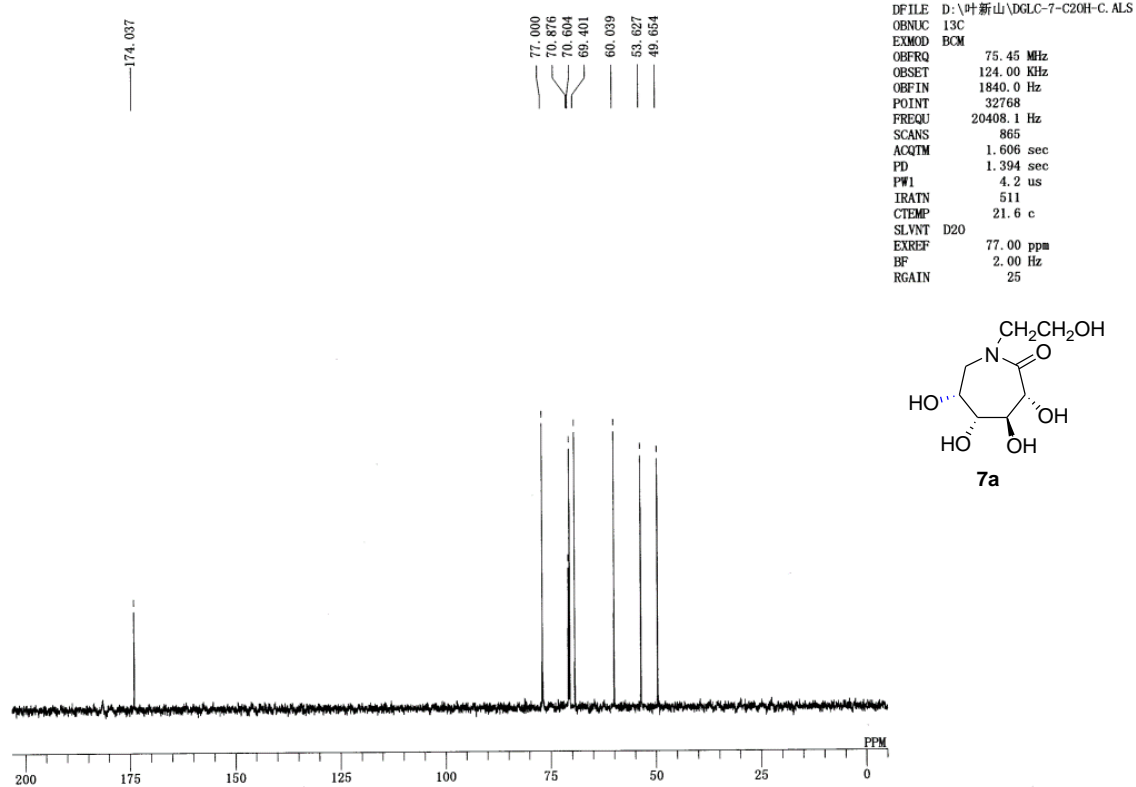

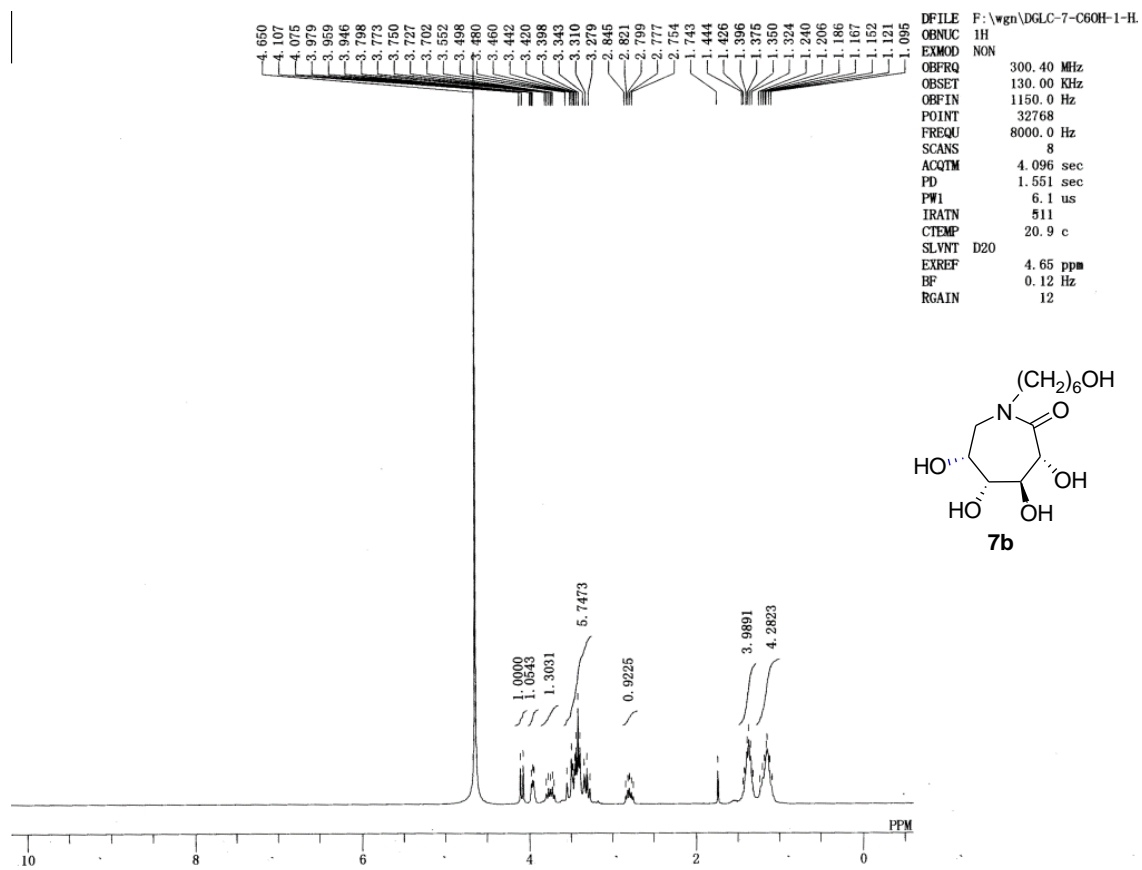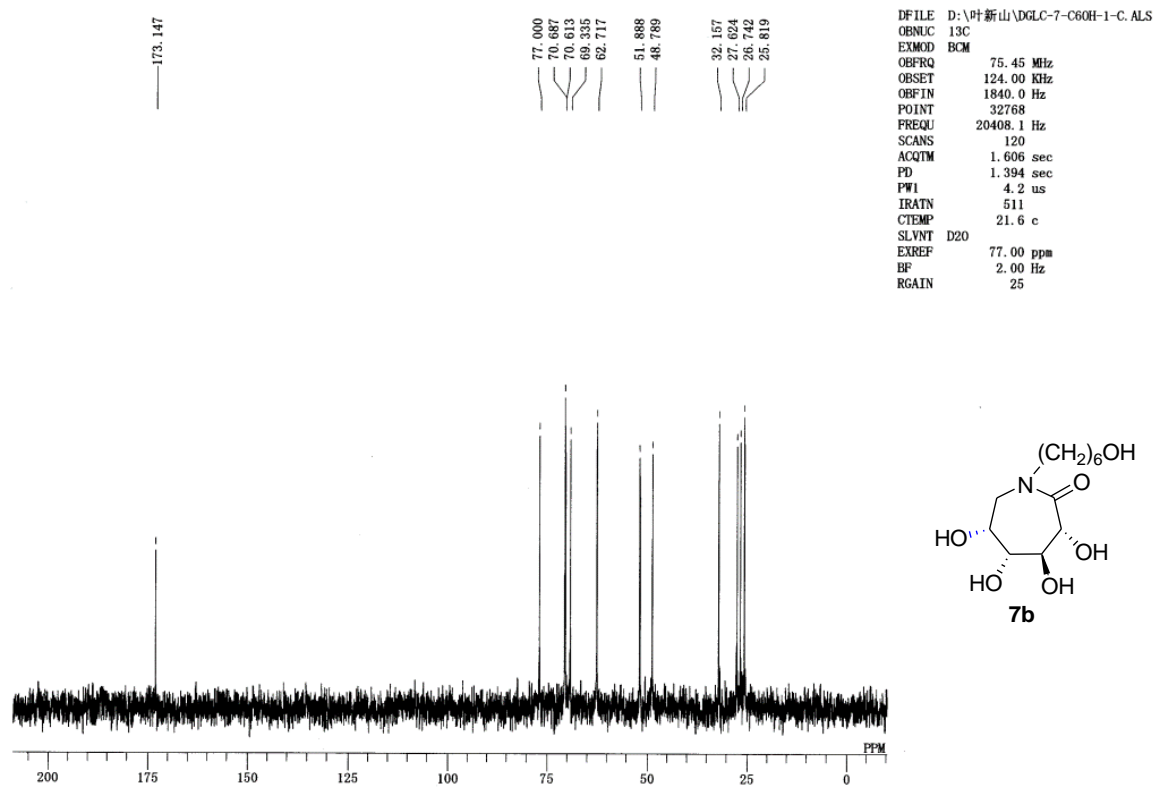

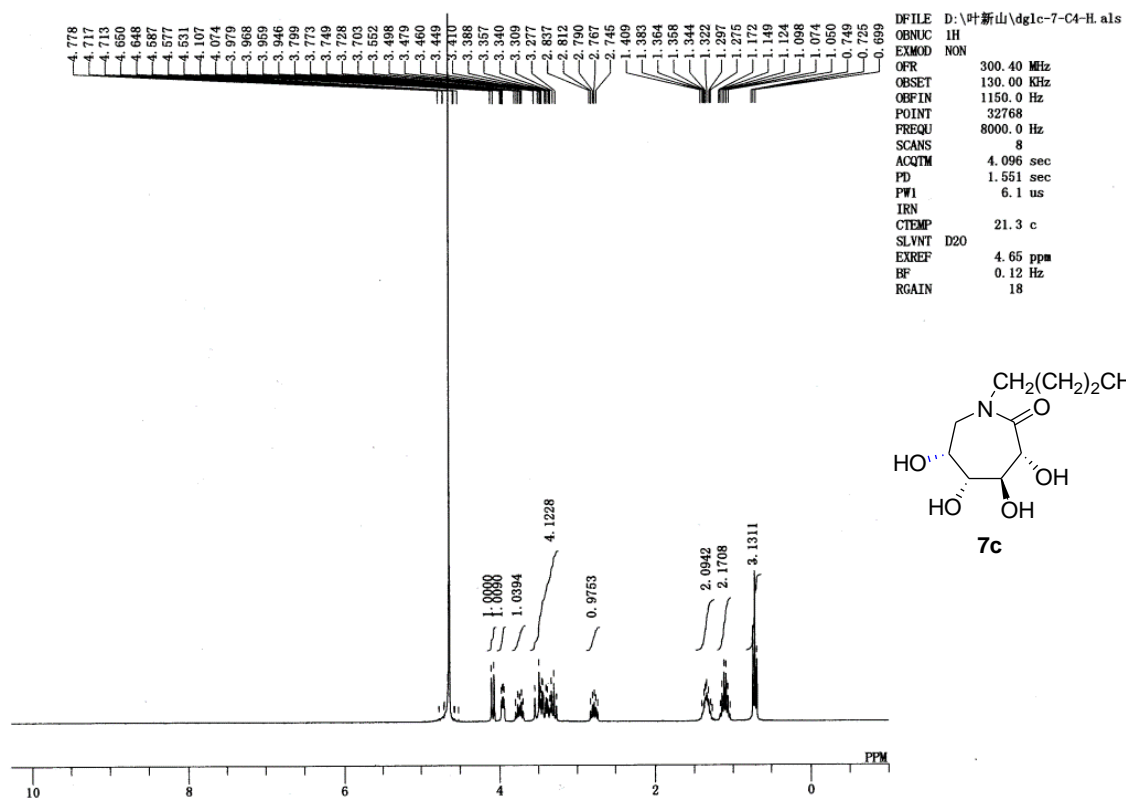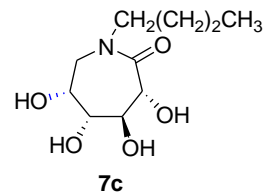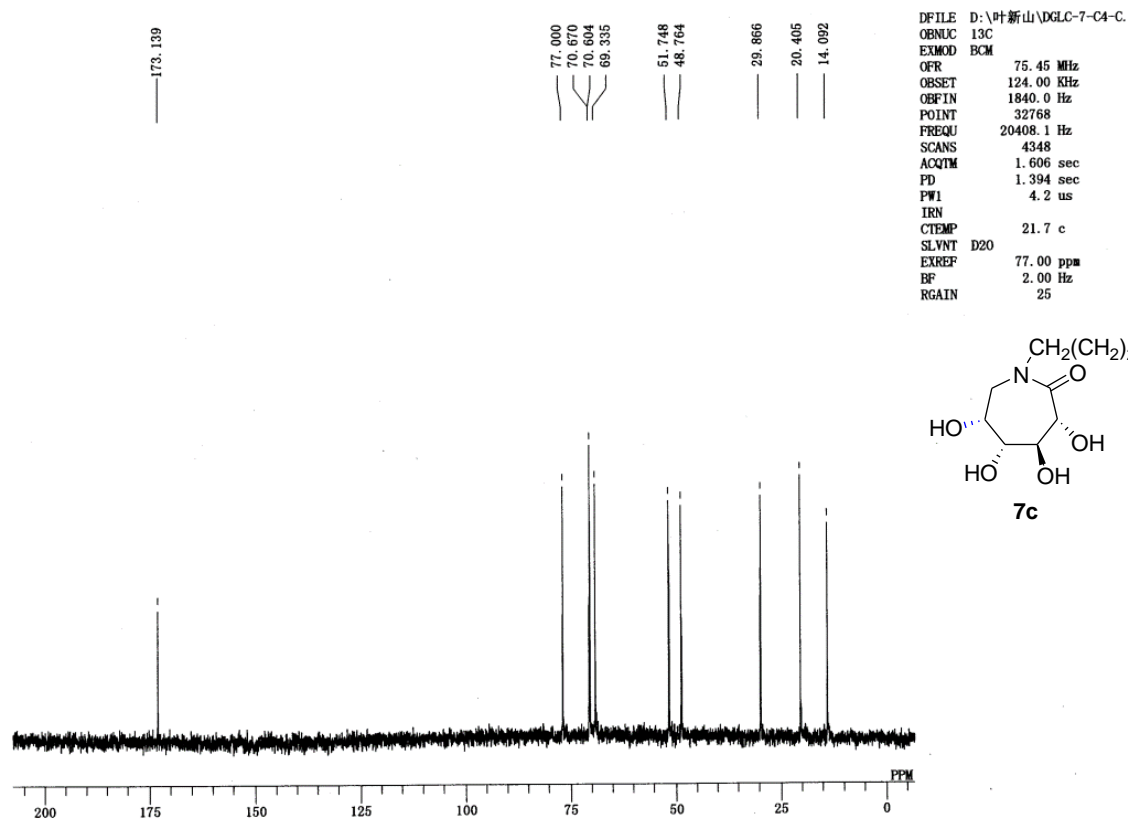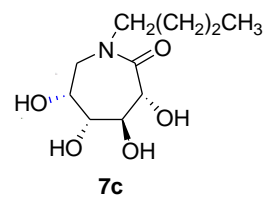

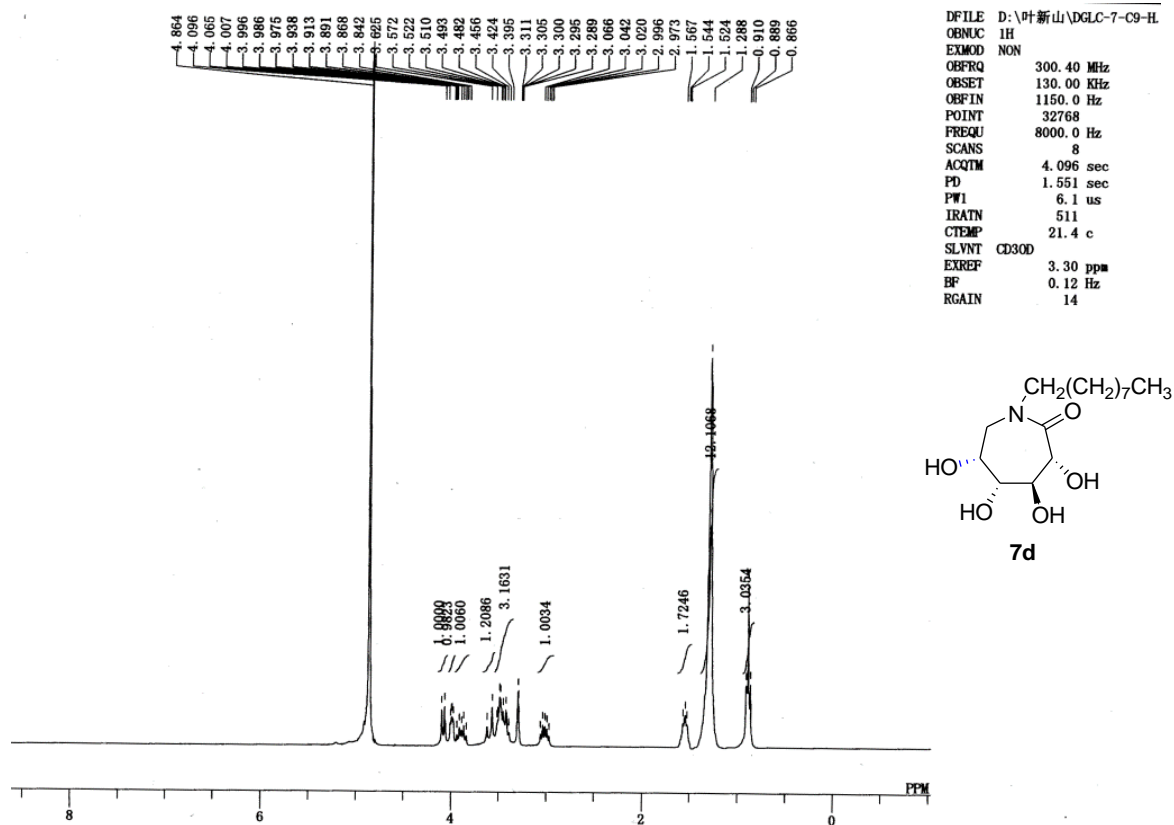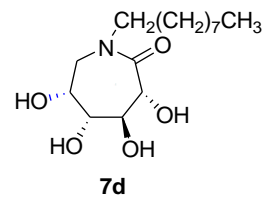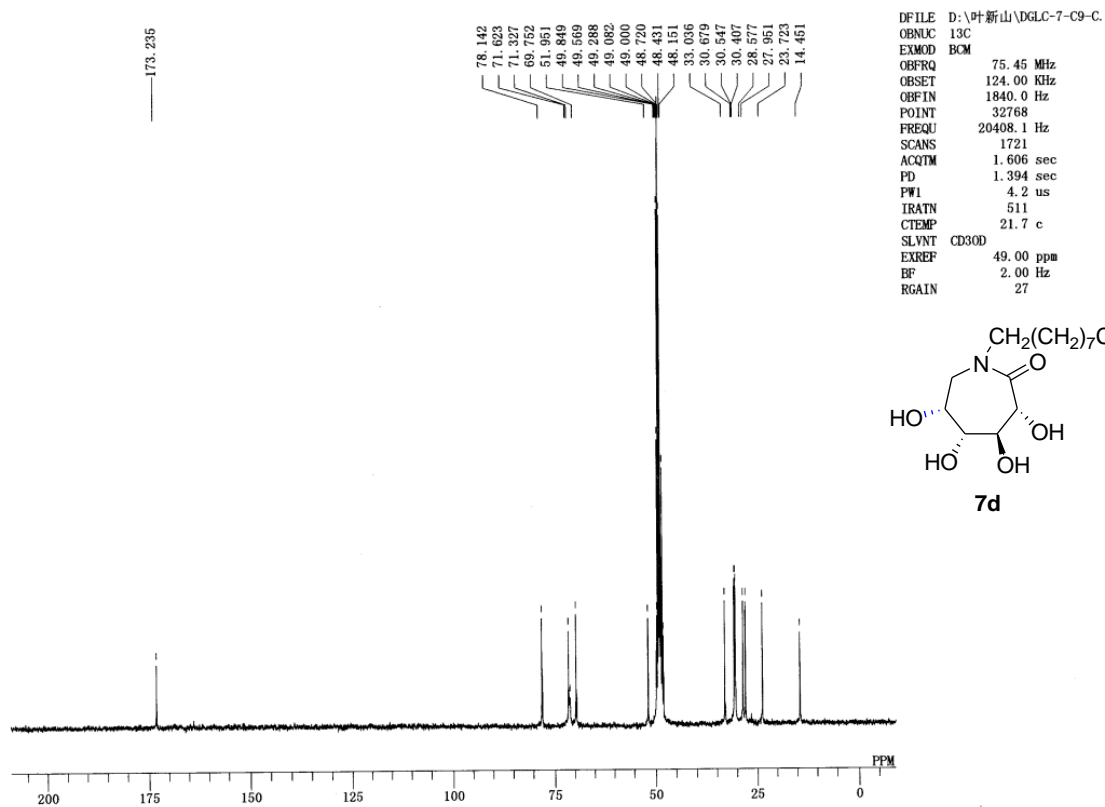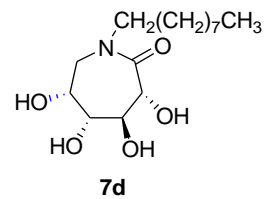

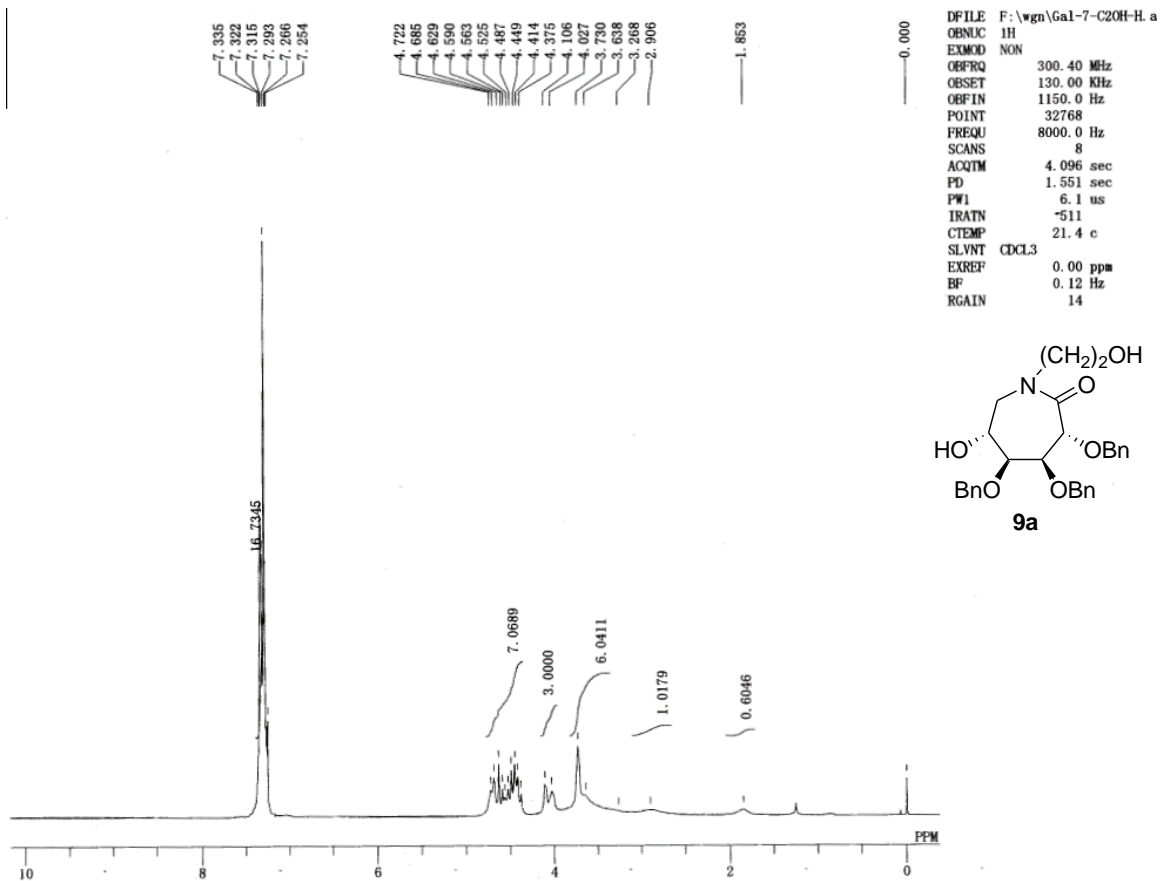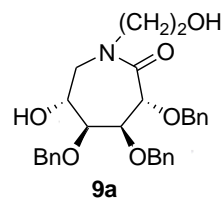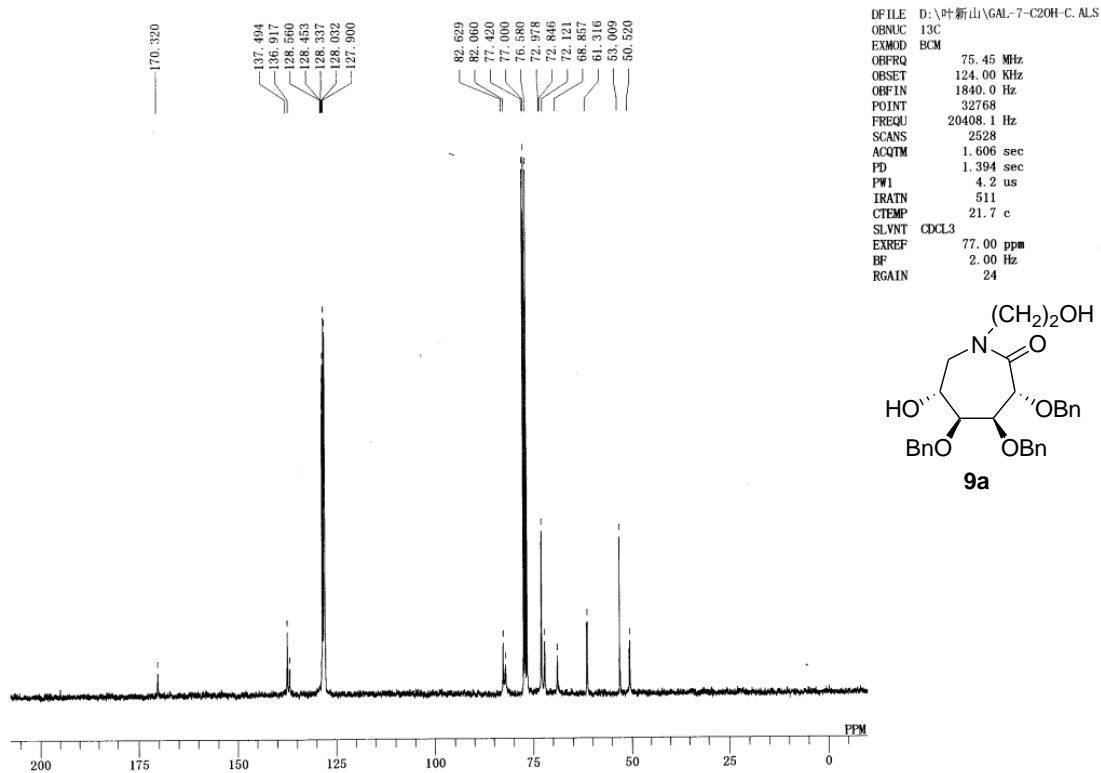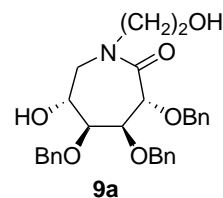

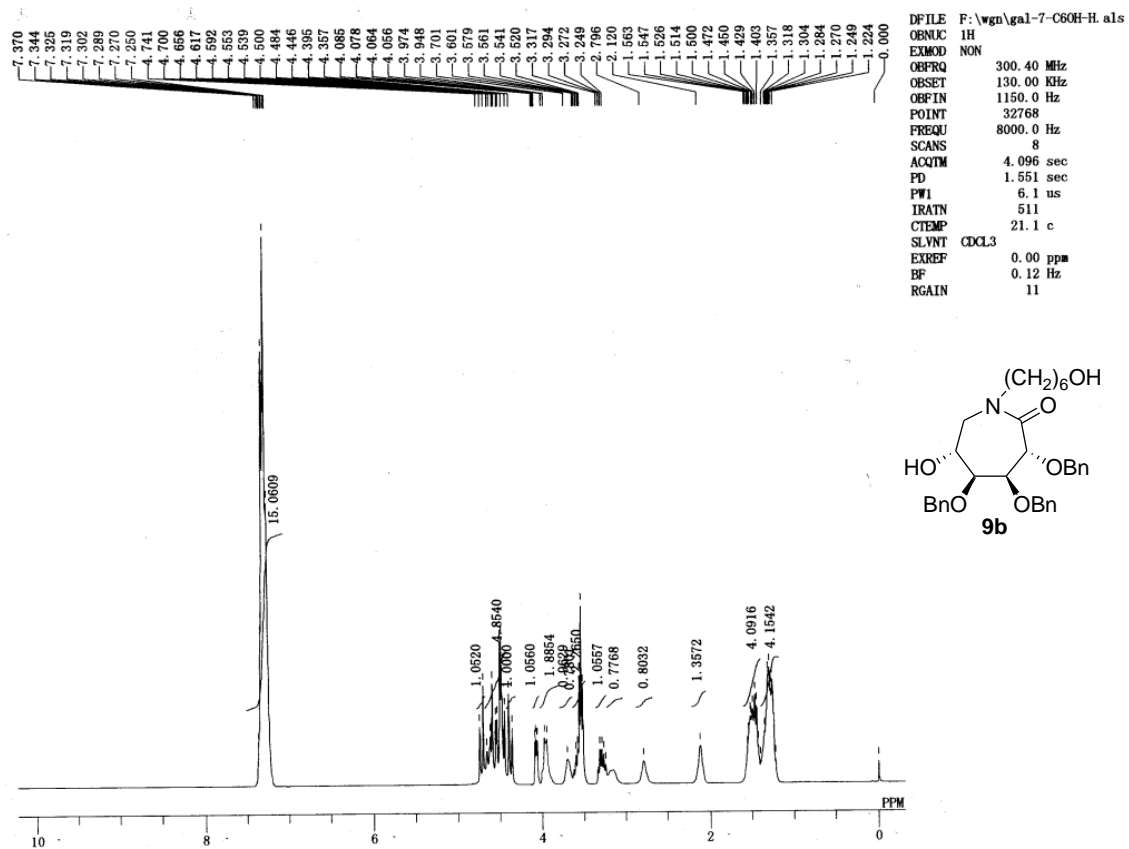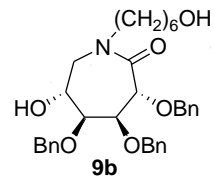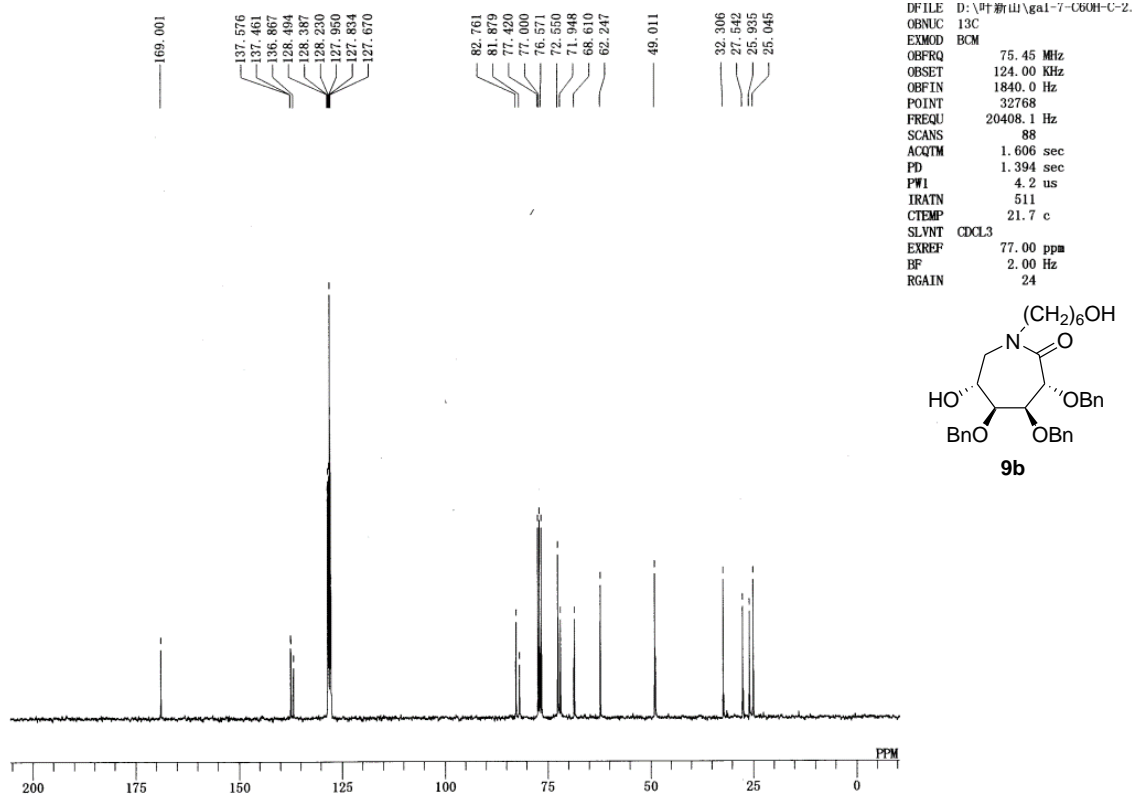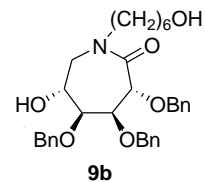

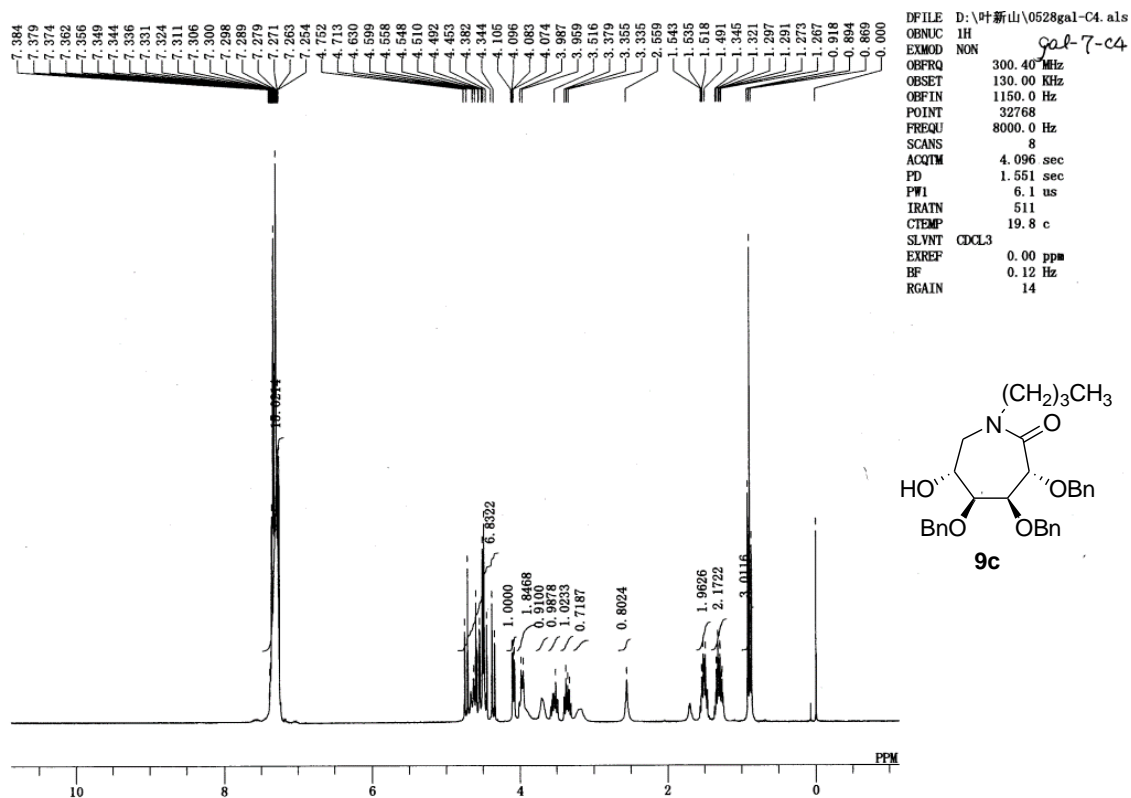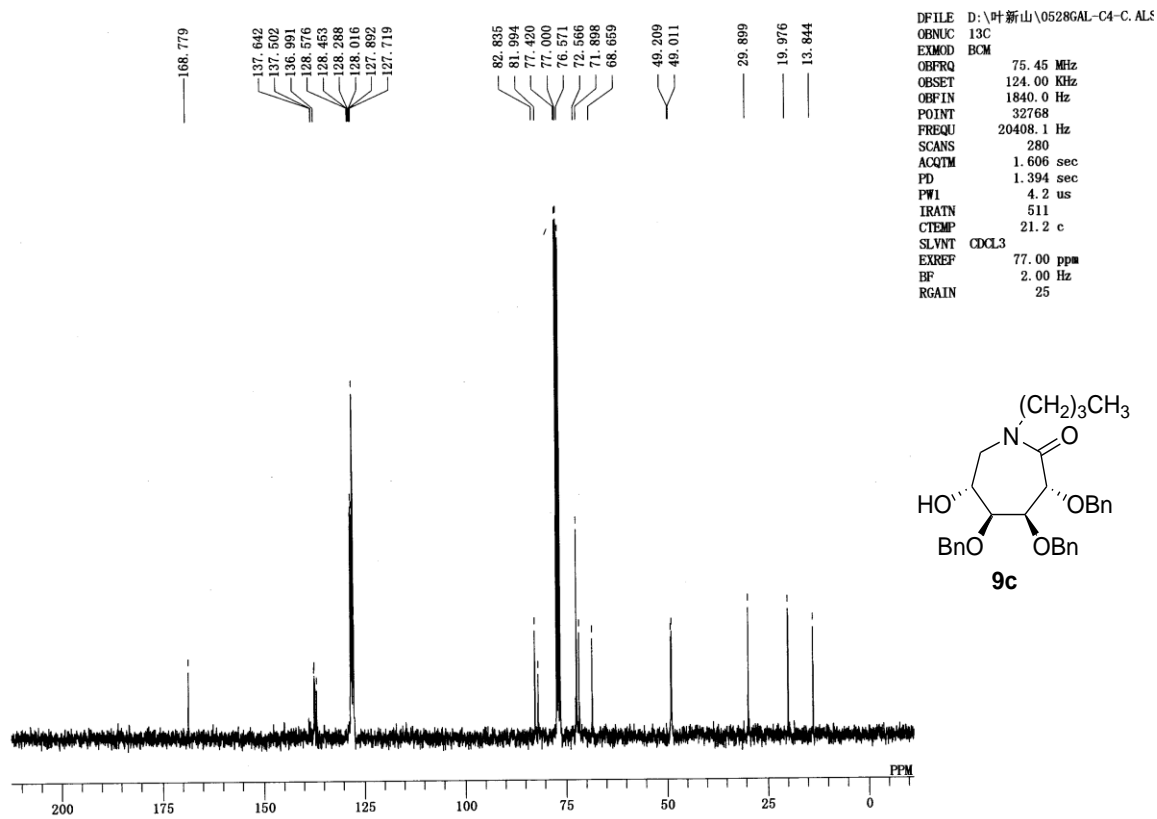



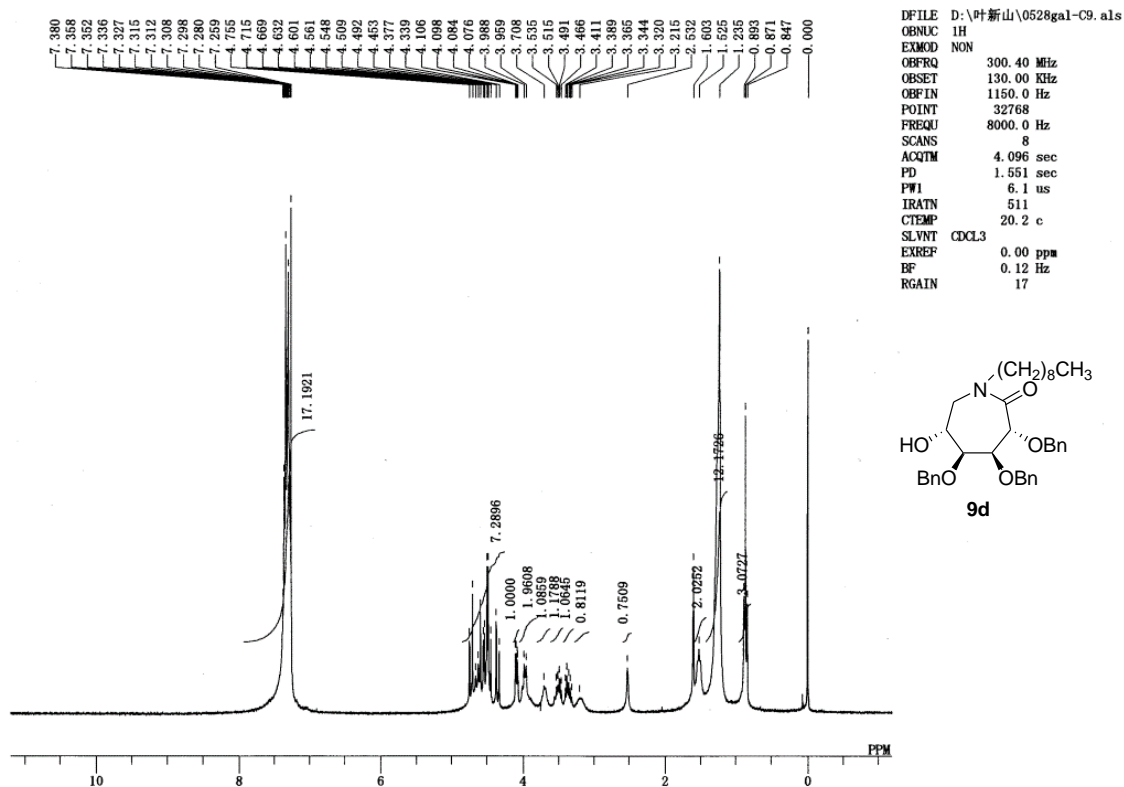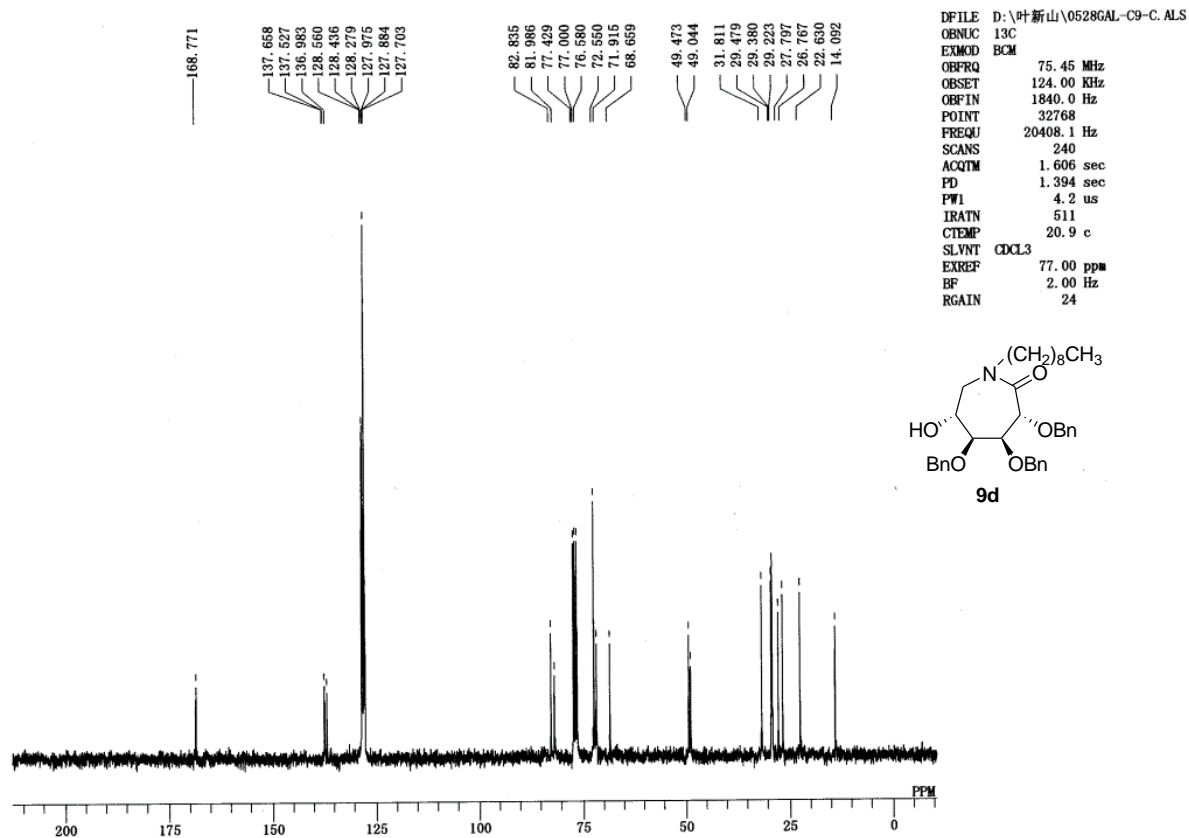

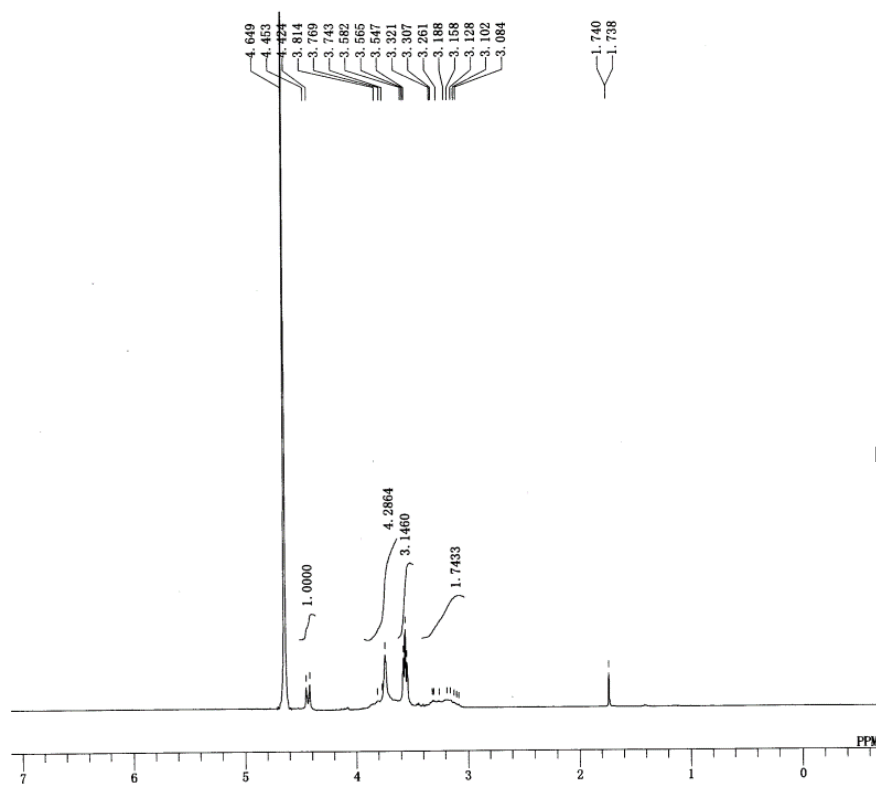

D:\叶新山\dgal-7-C2OH-H.als  
 DFILE  
 OBNUC 1H  
 EXMOD NON  
 OBFRQ 300.40 MHz  
 OBSET 130.00 KHz  
 OBFIN 1150.0 Hz  
 POINT 32768  
 FREQU 8000.0 Hz  
 SCANS 8  
 ACQTM 4.096 sec  
 PD 1.551 sec  
 PW1 6.1 us  
 IRATN 511  
 CTEMP 20.9 c  
 SLVNT D2O  
 EXREF 4.65 ppm  
 BF 0.12 Hz  
 RGAIN 17

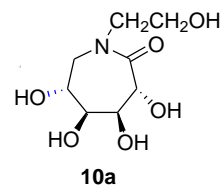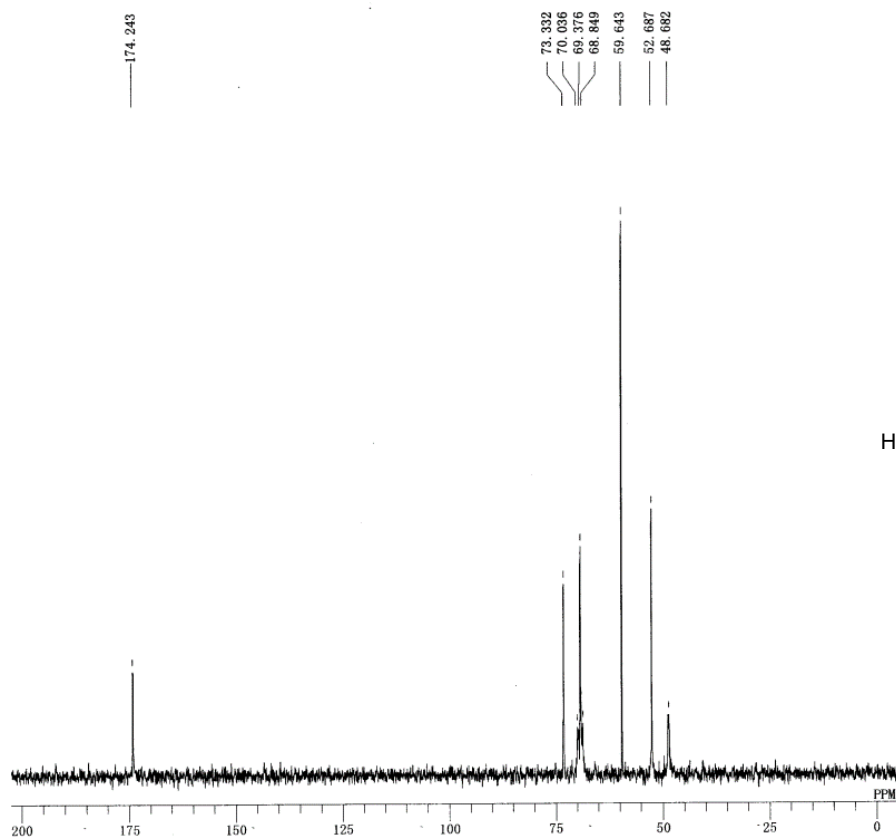

F:\wgn\DGAL-7-C2OH-C.ALS  
 DFILE  
 OBNUC 13C  
 EXMOD BCM  
 OBFRQ 75.45 MHz  
 OBSET 124.00 KHz  
 OBFIN 1840.0 Hz  
 POINT 32768  
 FREQU 20408.1 Hz  
 SCANS 3568  
 ACQTM 1.606 sec  
 PD 1.394 sec  
 PW1 4.2 us  
 IRATN 511  
 CTEMP 21.7 c  
 SLVNT D2O  
 EXREF 77.00 ppm  
 BF 2.00 Hz  
 RGAIN 25

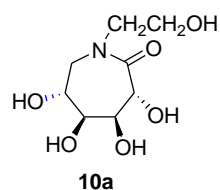

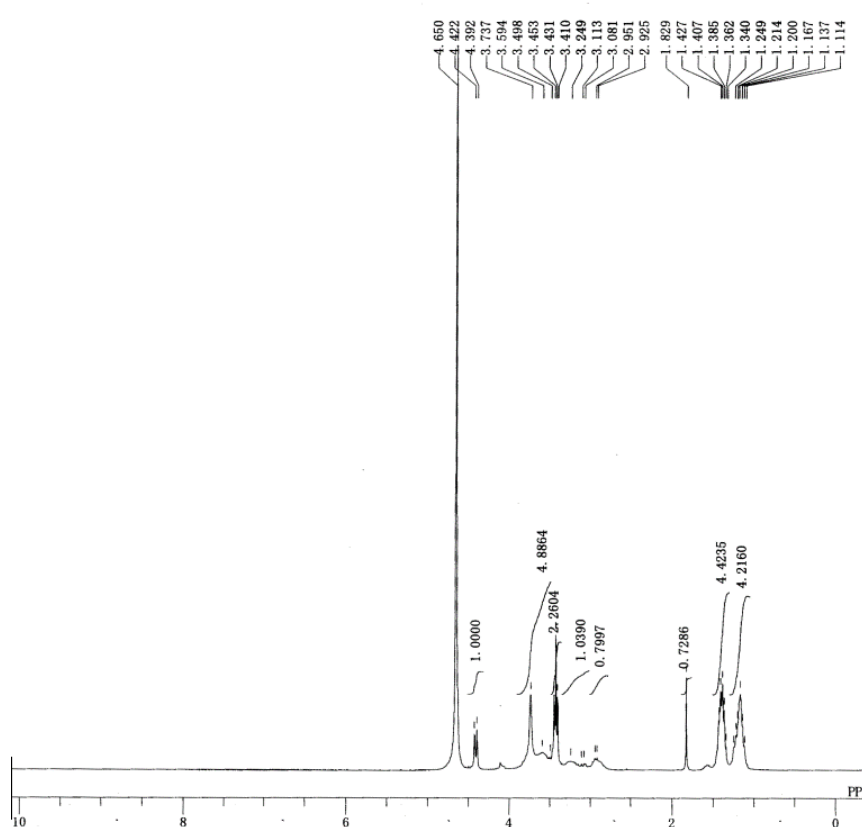

DFILE F:\wgn\dgal-7-C6OH-1-H. a1  
 OBNUC 1H  
 EXMOD NON  
 OBFREQ 300.40 MHz  
 OBSSET 130.00 KHz  
 OBFIN 1150.0 Hz  
 POINT 32768  
 FREQU 8000.0 Hz  
 SCANS 8  
 ACQTM 4.096 sec  
 PD 1.551 sec  
 PW1 6.1 us  
 IRATN 511  
 CTEMP 21.7 c  
 SLVNT D2O  
 EXREF 4.65 ppm  
 BF 0.12 Hz  
 RGAIN 12

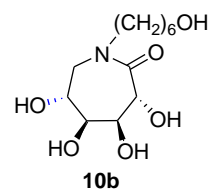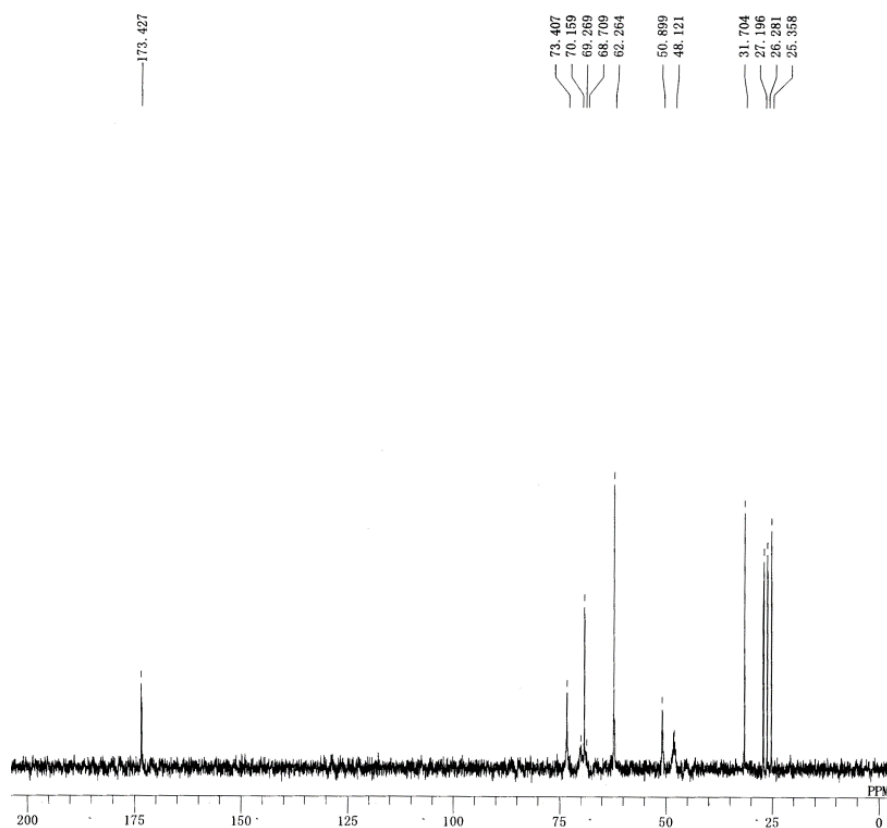

DFILE F:\wgn\dgal-7-C6OH-3-C. a  
 OBNUC 13C  
 EXMOD BCM  
 OBFREQ 75.45 MHz  
 OBSSET 124.00 KHz  
 OBFIN 1840.0 Hz  
 POINT 32768  
 FREQU 20408.1 Hz  
 SCANS 321  
 ACQTM 1.606 sec  
 PD 1.394 sec  
 PW1 4.2 us  
 IRATN 511  
 CTEMP 21.7 c  
 SLVNT D2O  
 EXREF 77.00 ppm  
 BF 2.00 Hz  
 RGAIN 27

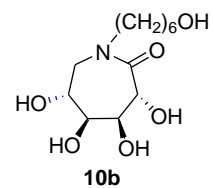

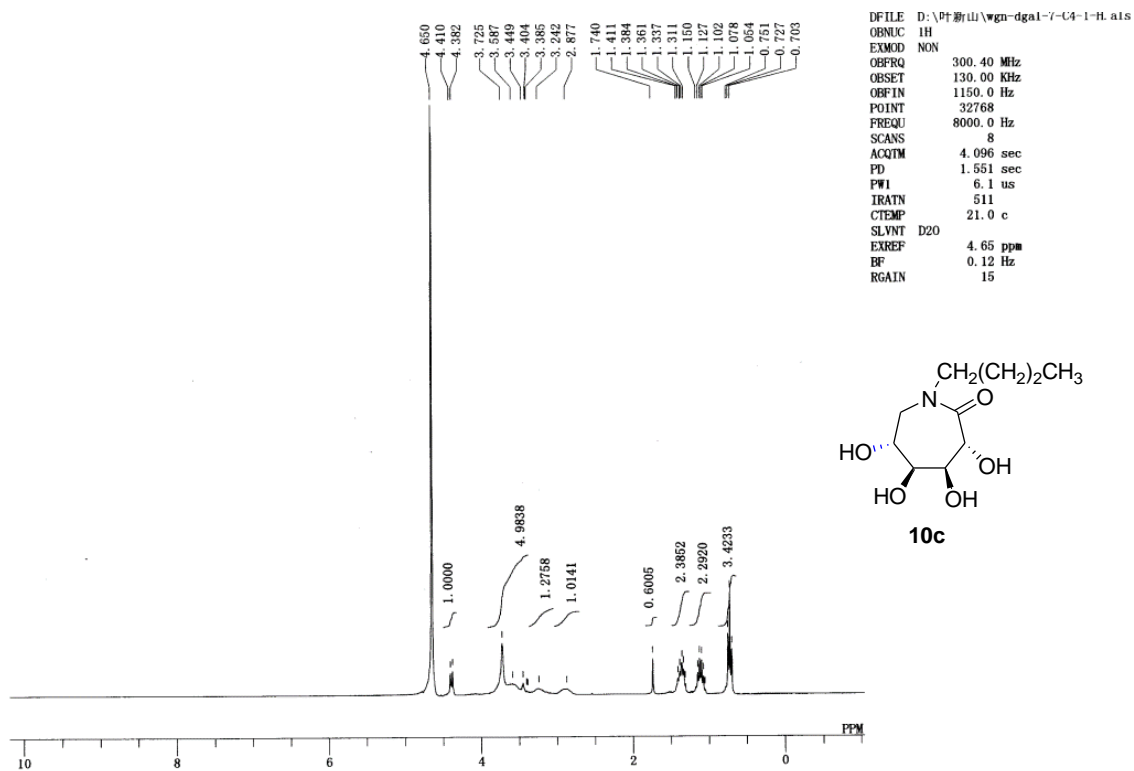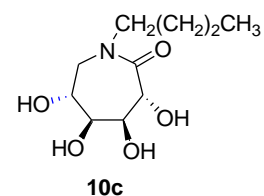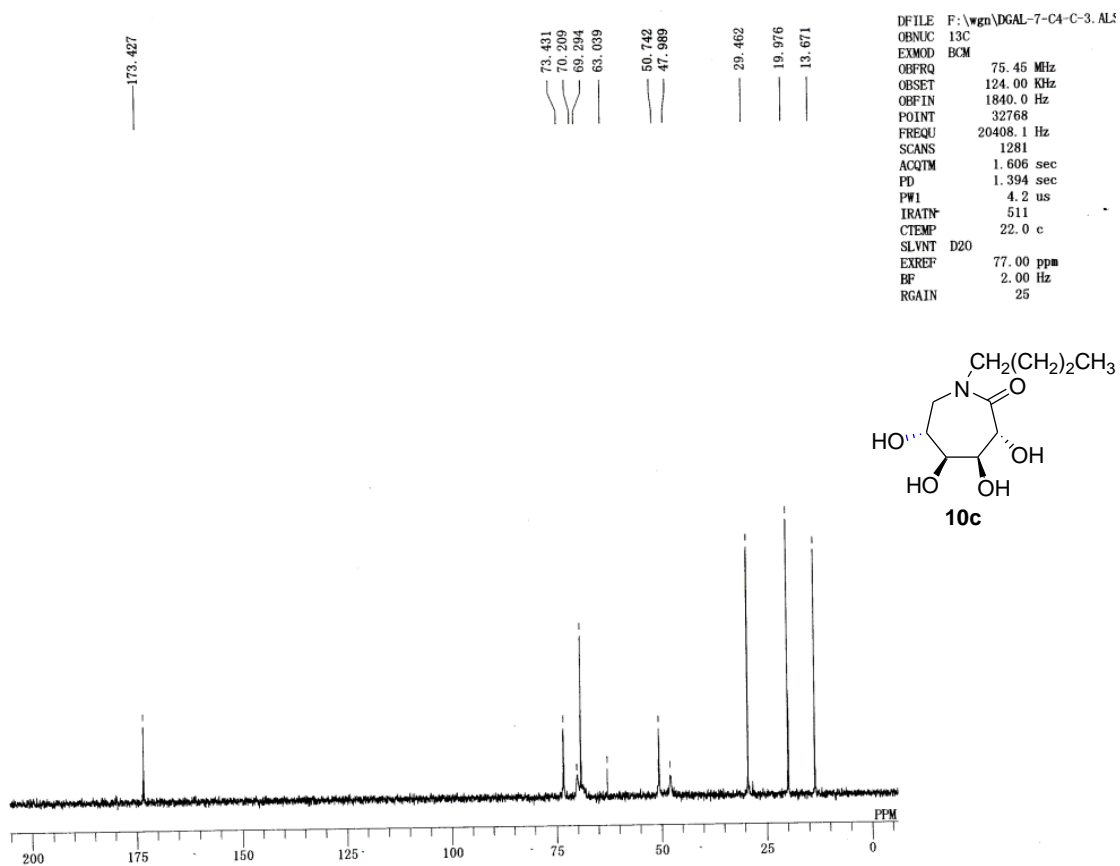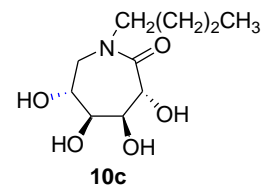

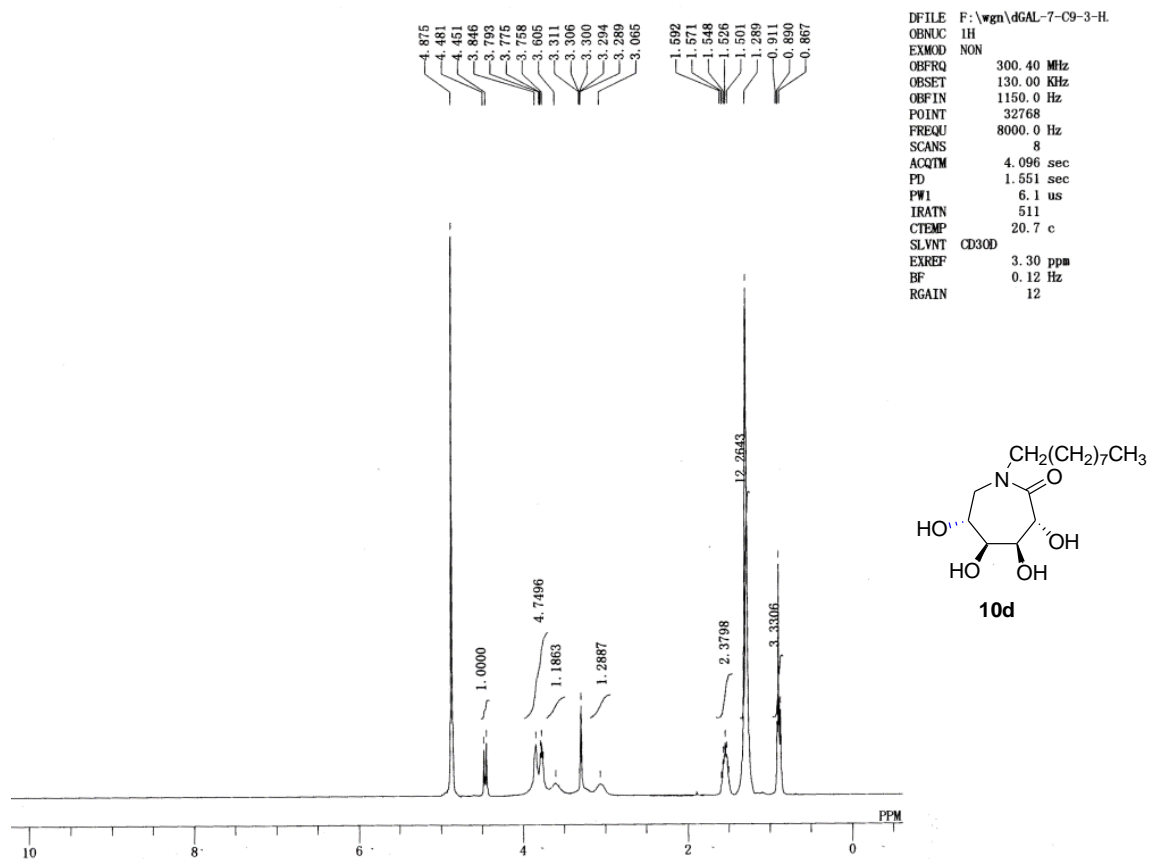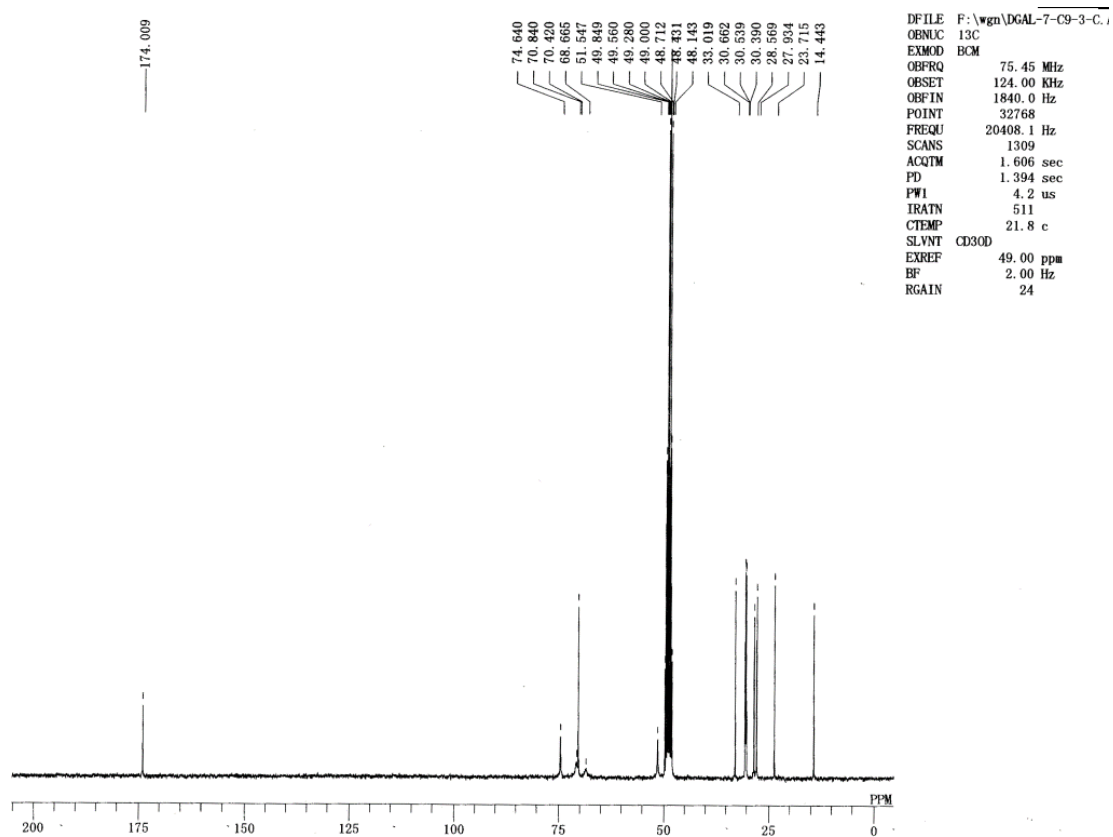

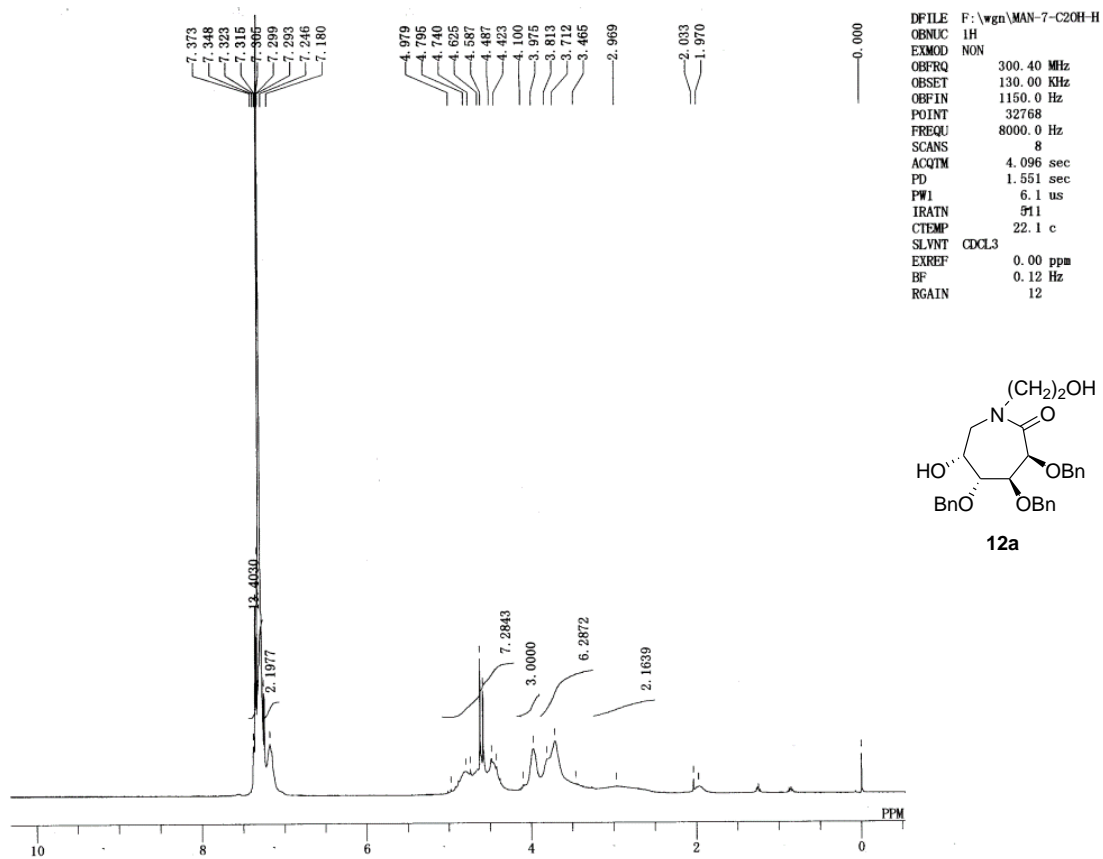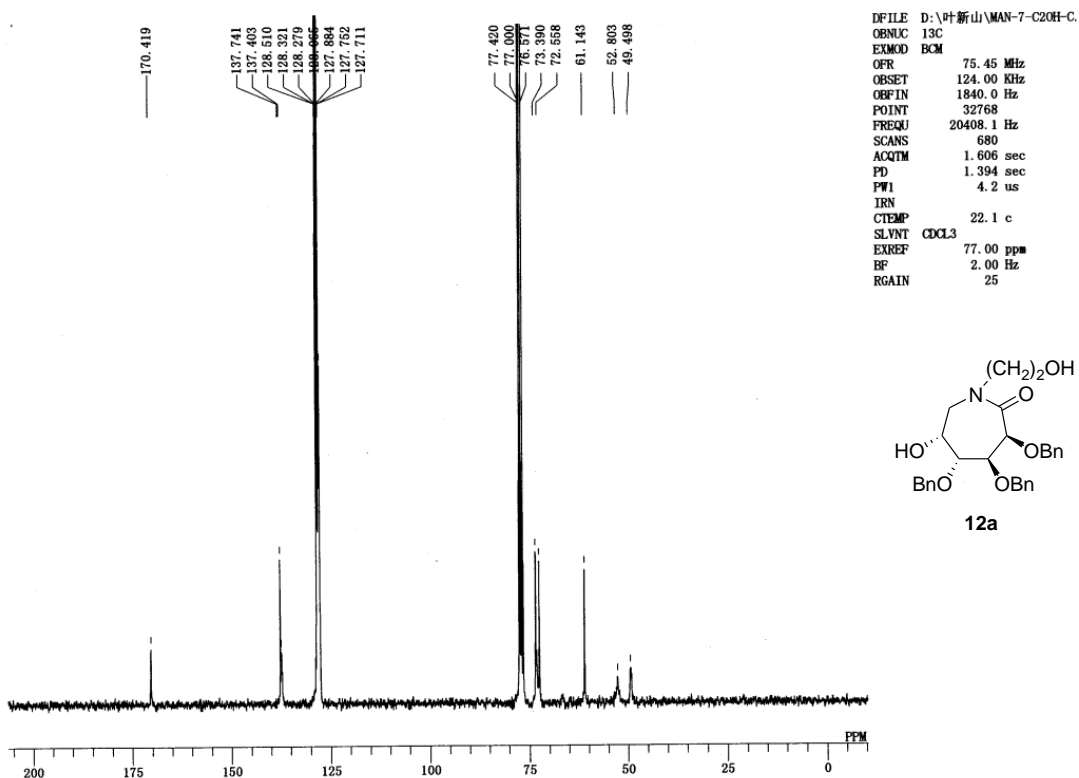

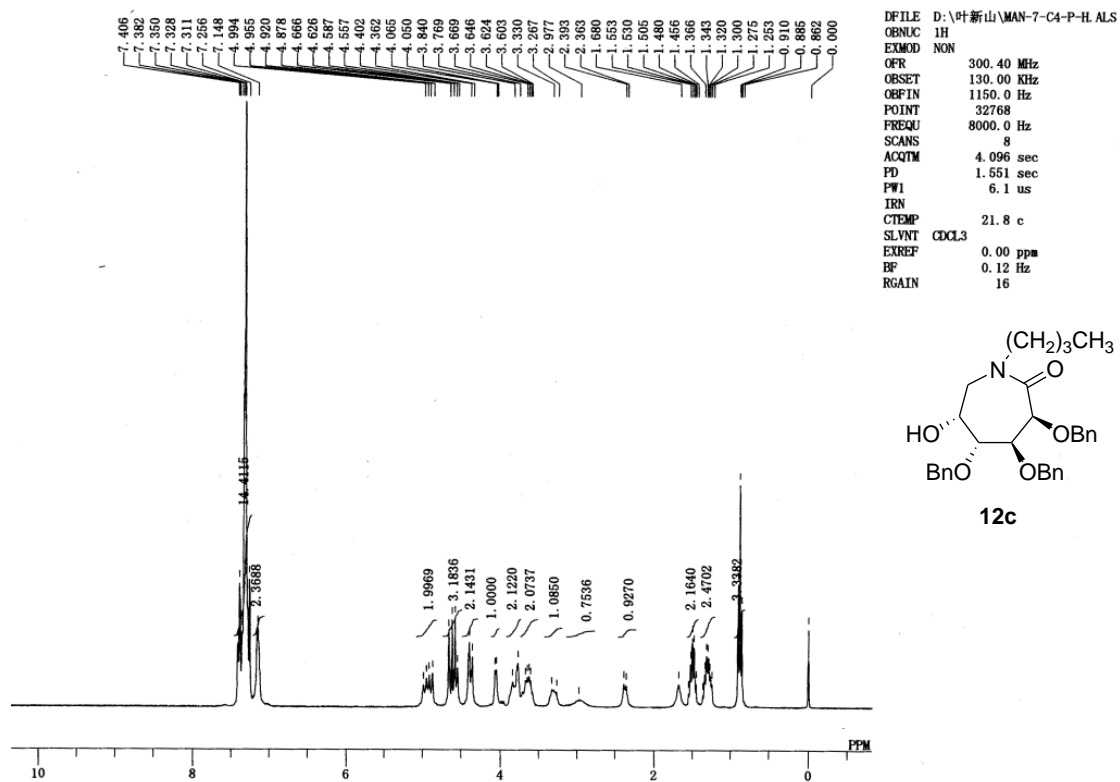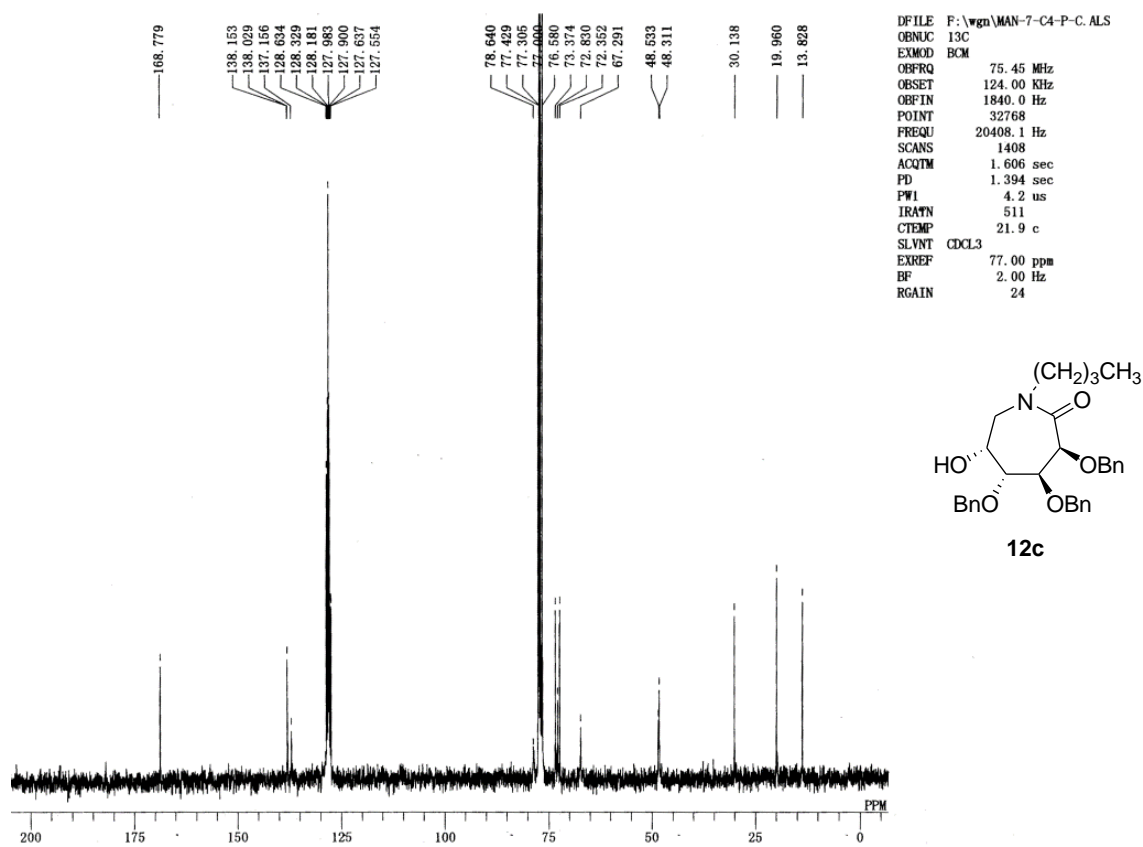

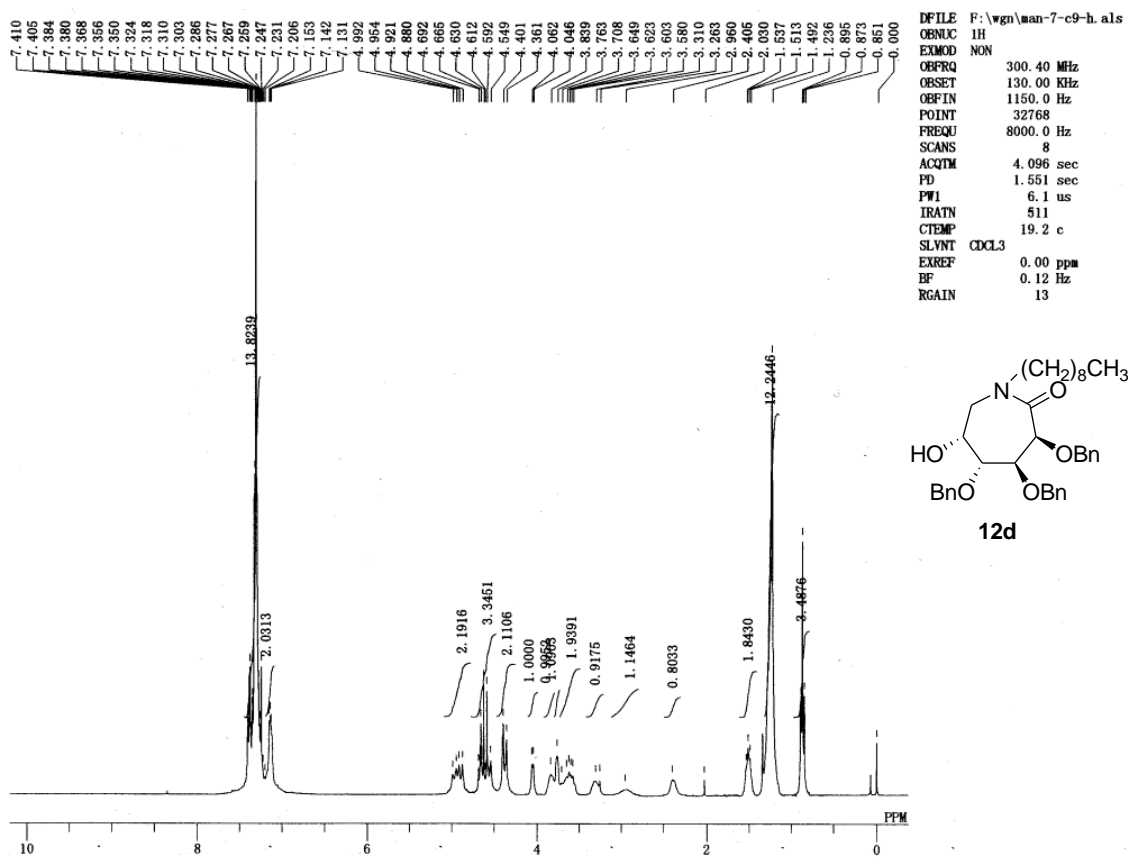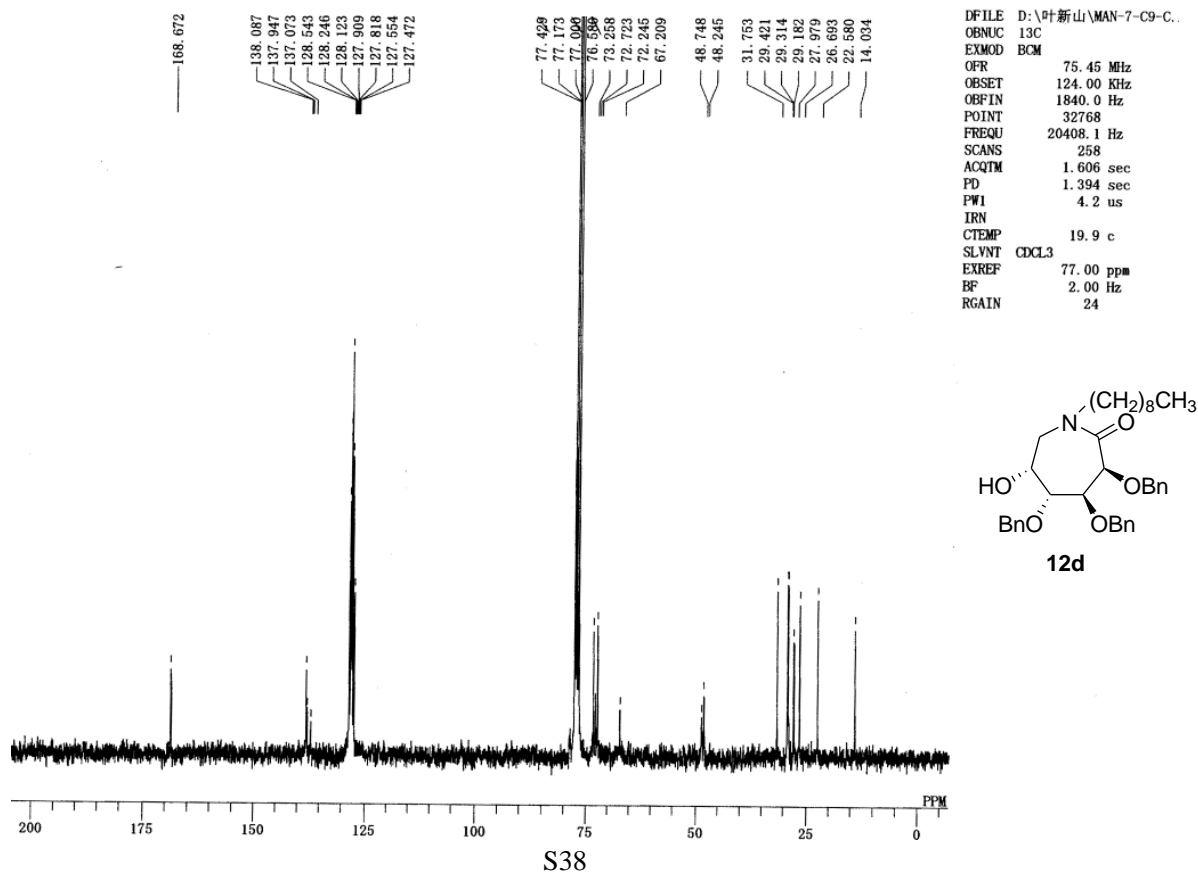



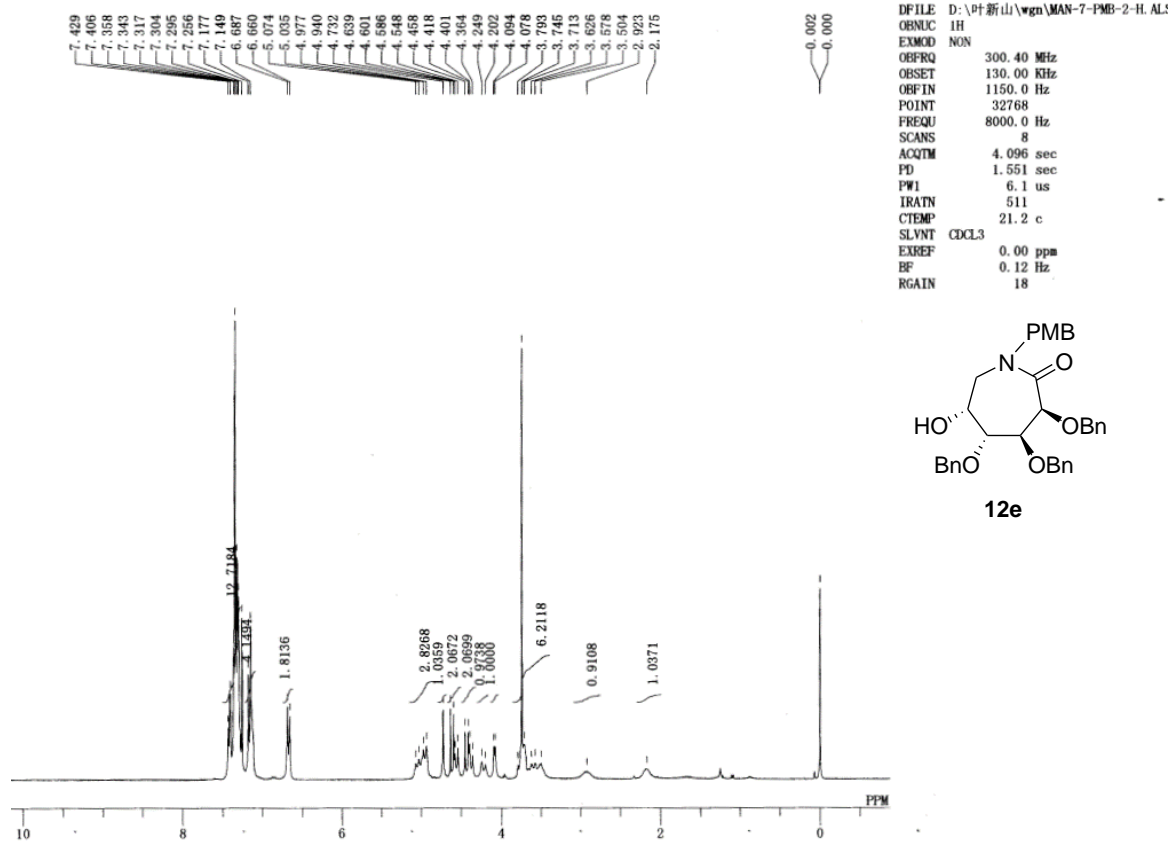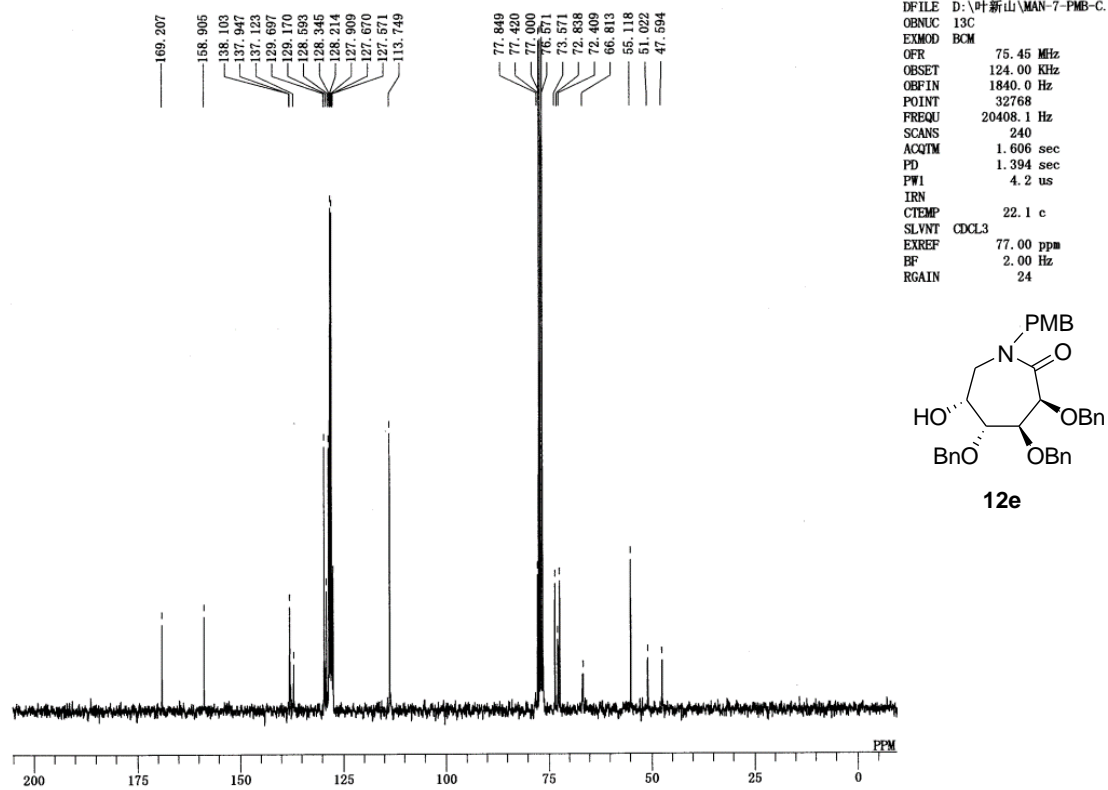

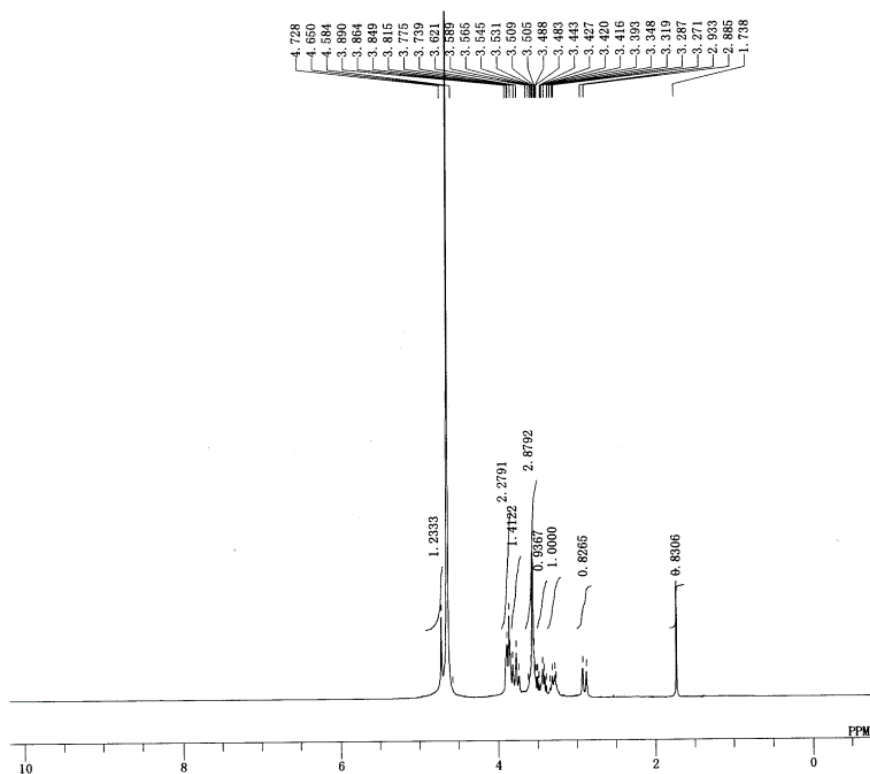

DFILE D:\叶新山\DMAN-7-C2OH-H-4. ALS  
 ORNUC 1H  
 EXMOD NON  
 OBFREQ 300.40 MHz  
 OBSEF 130.00 KHz  
 OBFIN 1150.0 Hz  
 POINT 32768  
 FREQU 8000.0 Hz  
 SCANS 8  
 ACQTM 4.096 sec  
 PD 1.551 sec  
 PW1 6.1 us  
 IRATN 511  
 CTEMP 20.4 c  
 SLVNT D2O  
 EXREF 4.65 ppm  
 BF 0.12 Hz  
 RGAIN 16

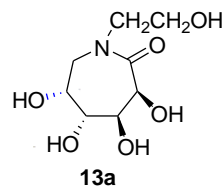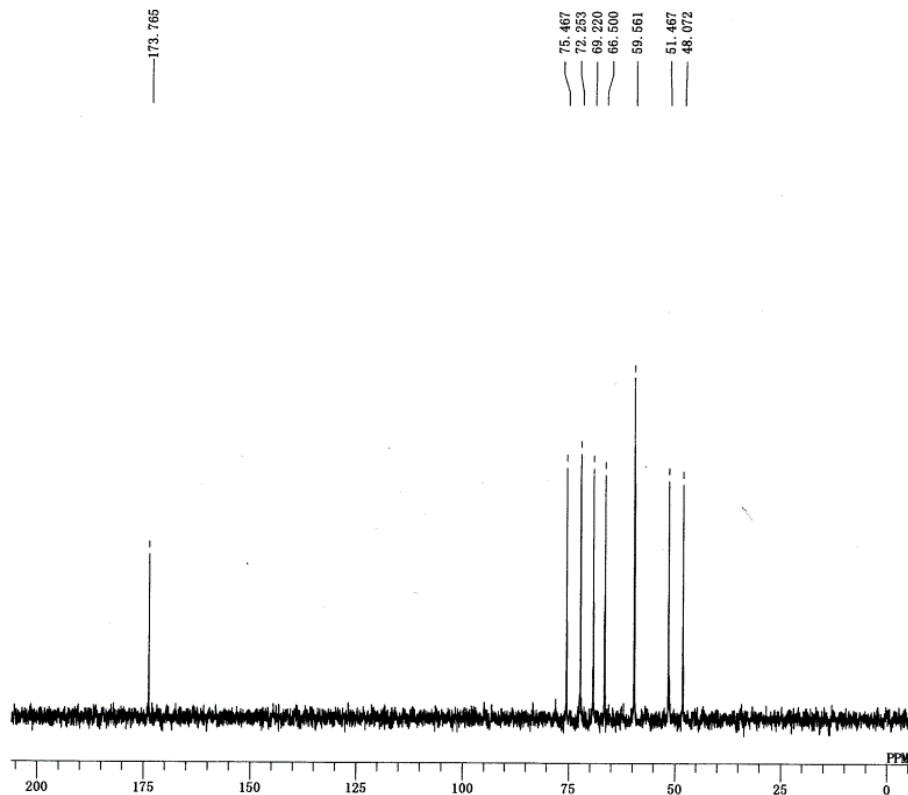

DFILE D:\叶新山\DMAN-7-C2OH-C-4. ALS  
 ORNUC 13C  
 EXMOD BCM  
 OBFREQ 75.45 MHz  
 OBSEF 124.00 KHz  
 OBFIN 1840.0 Hz  
 POINT 32768  
 FREQU 20408.1 Hz  
 SCANS 3988  
 ACQTM 1.606 sec  
 PD 1.394 sec  
 PW1 4.2 us  
 IRATN 511  
 CTEMP 20.7 c  
 SLVNT D2O  
 EXREF 77.00 ppm  
 BF 2.00 Hz  
 RGAIN 25

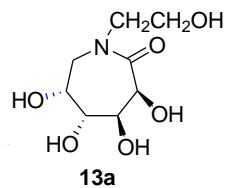

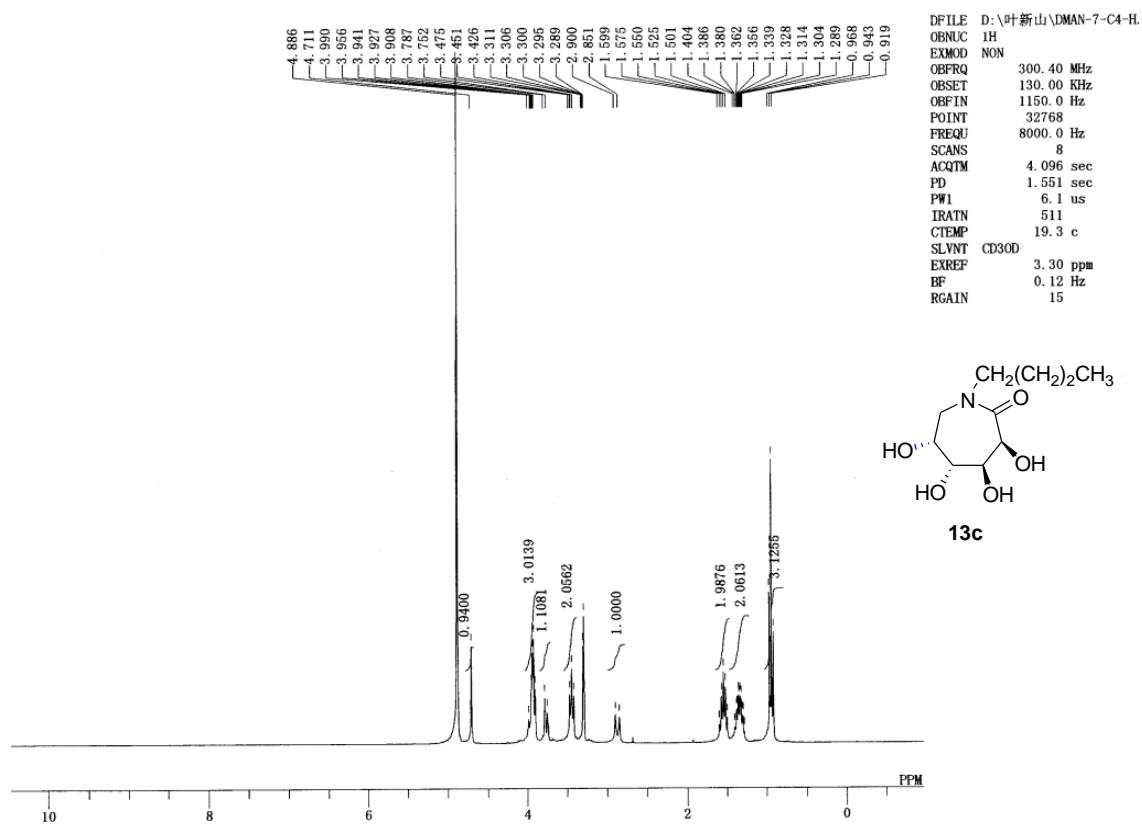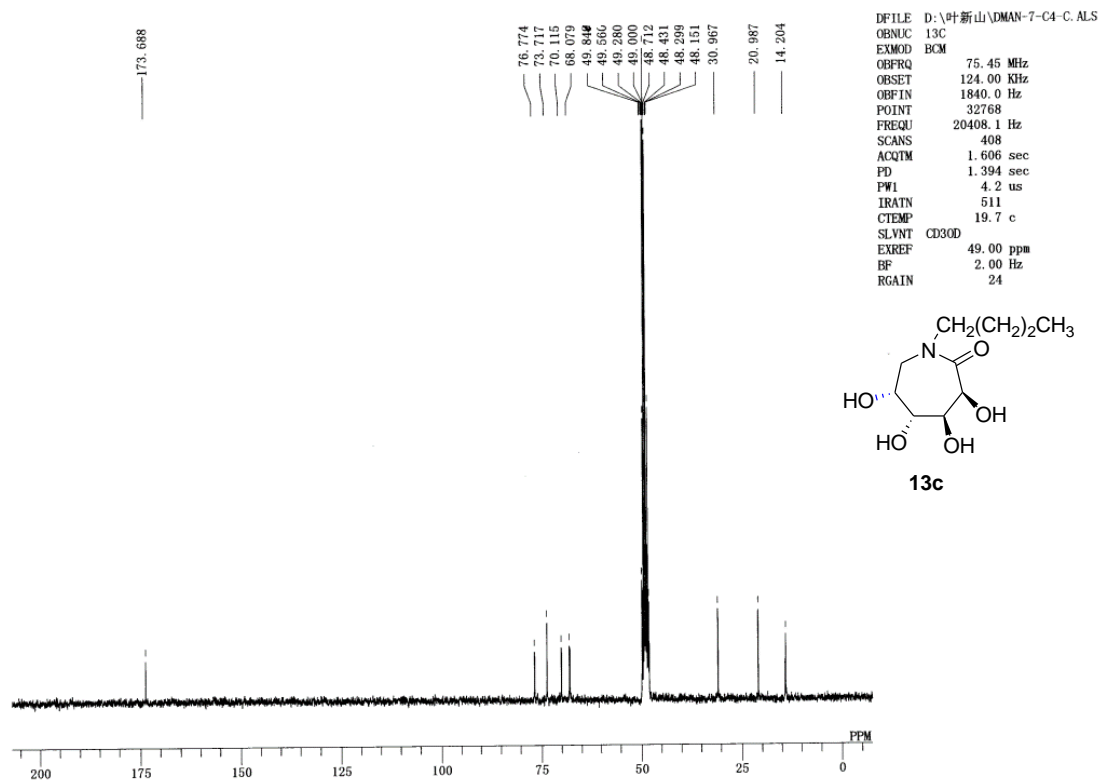

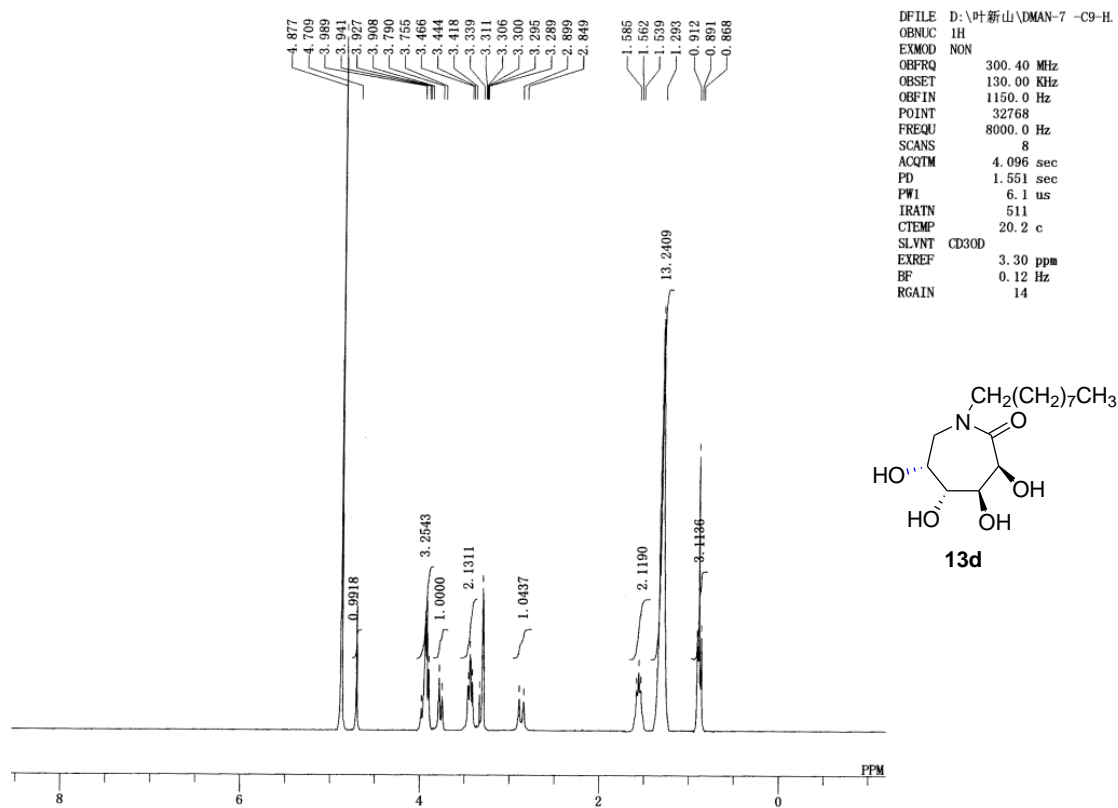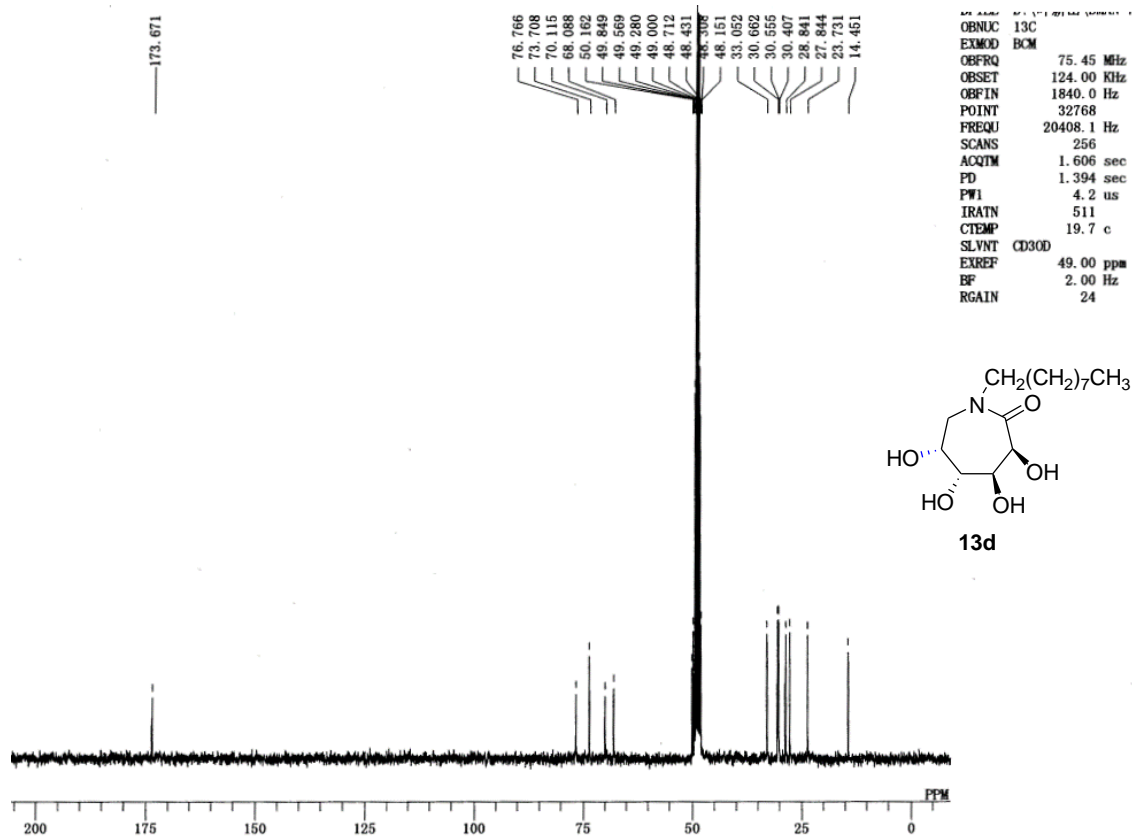

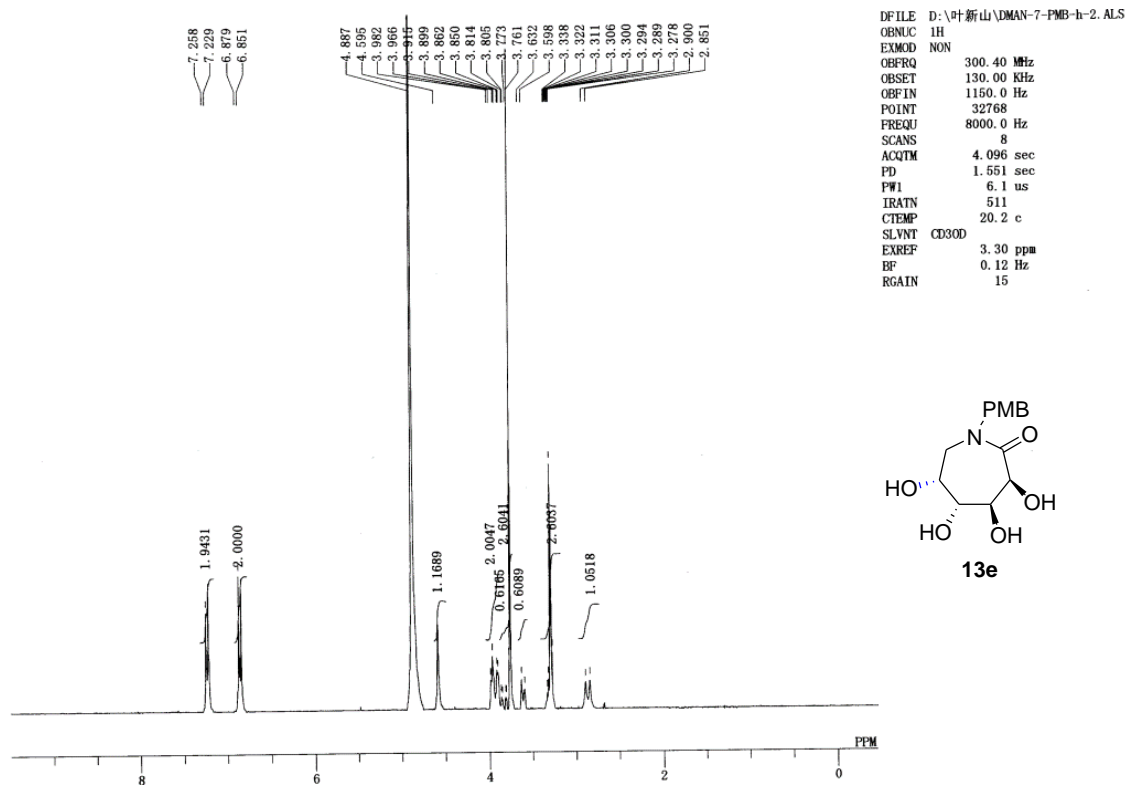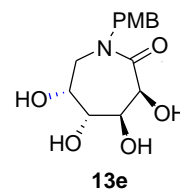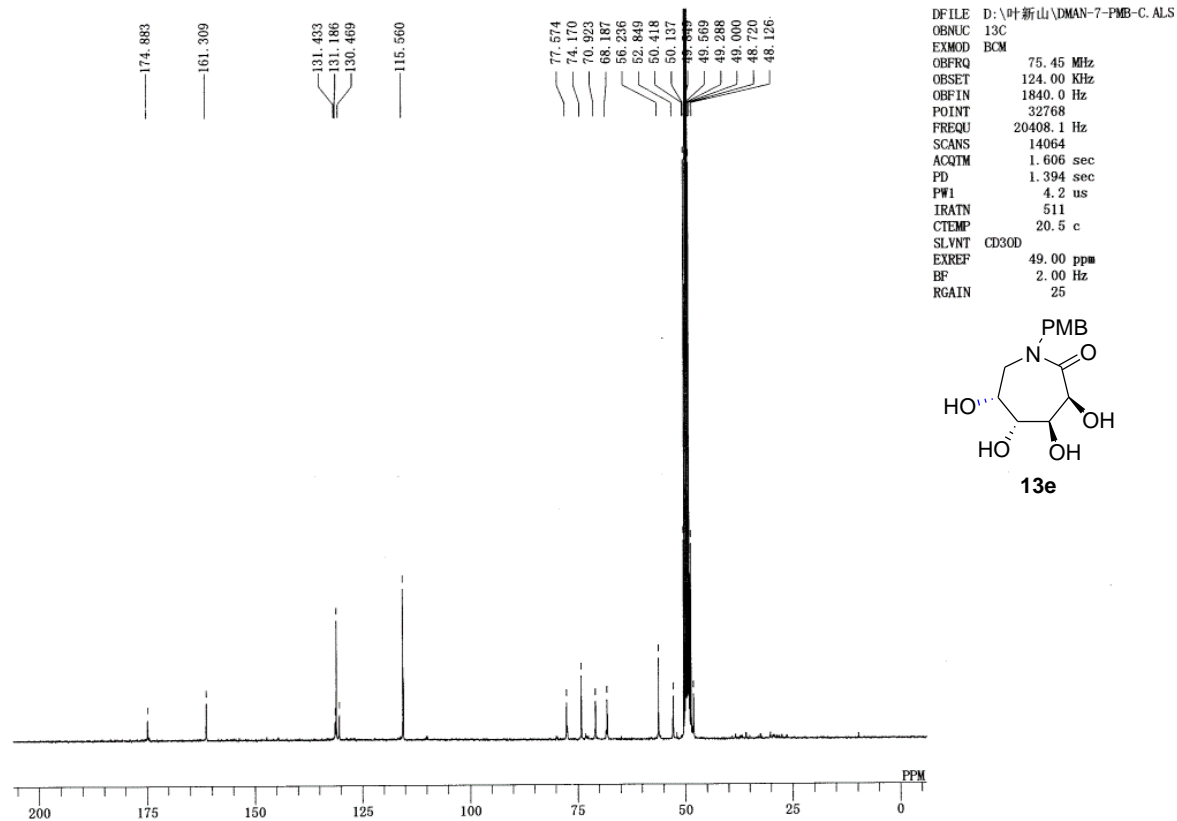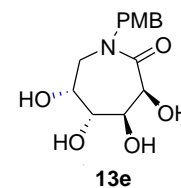

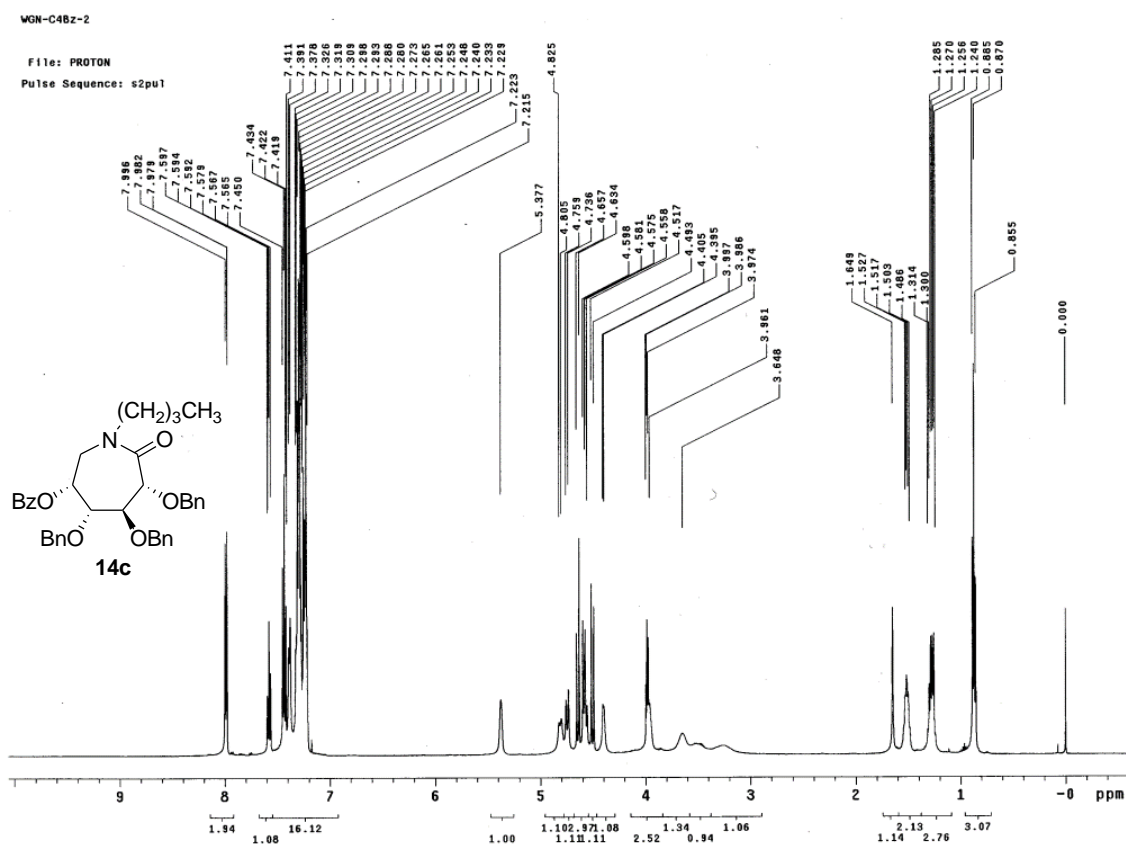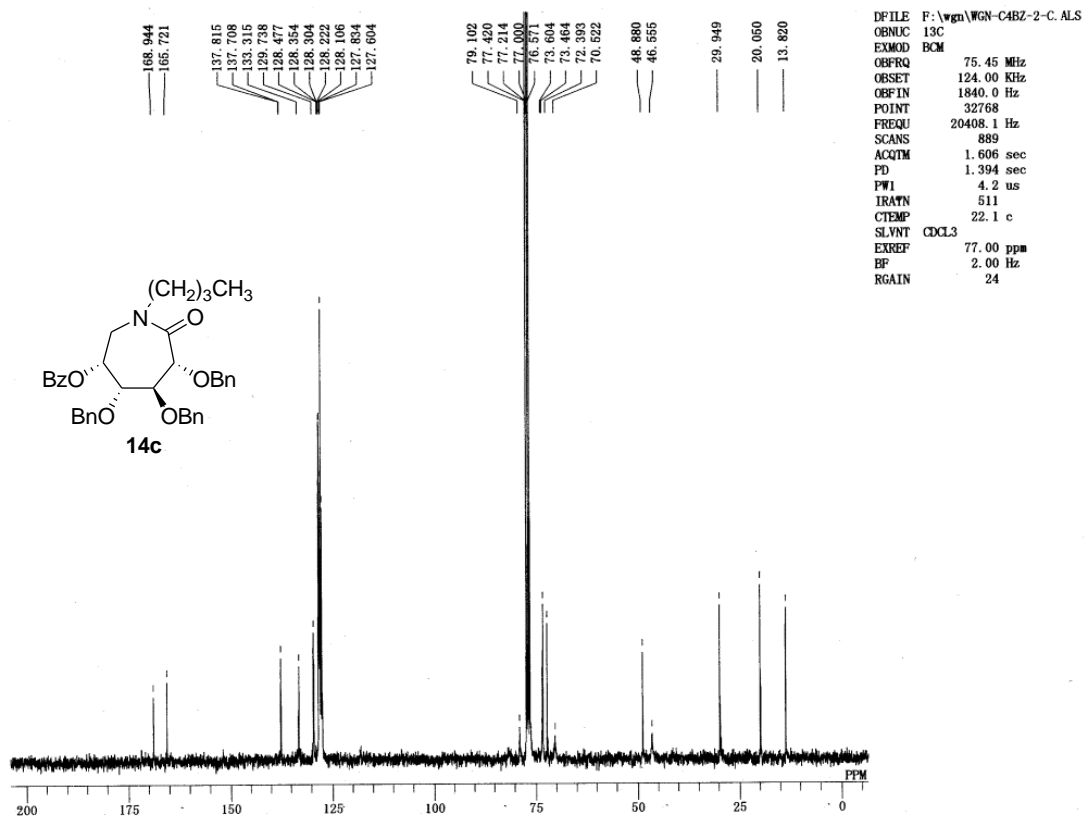

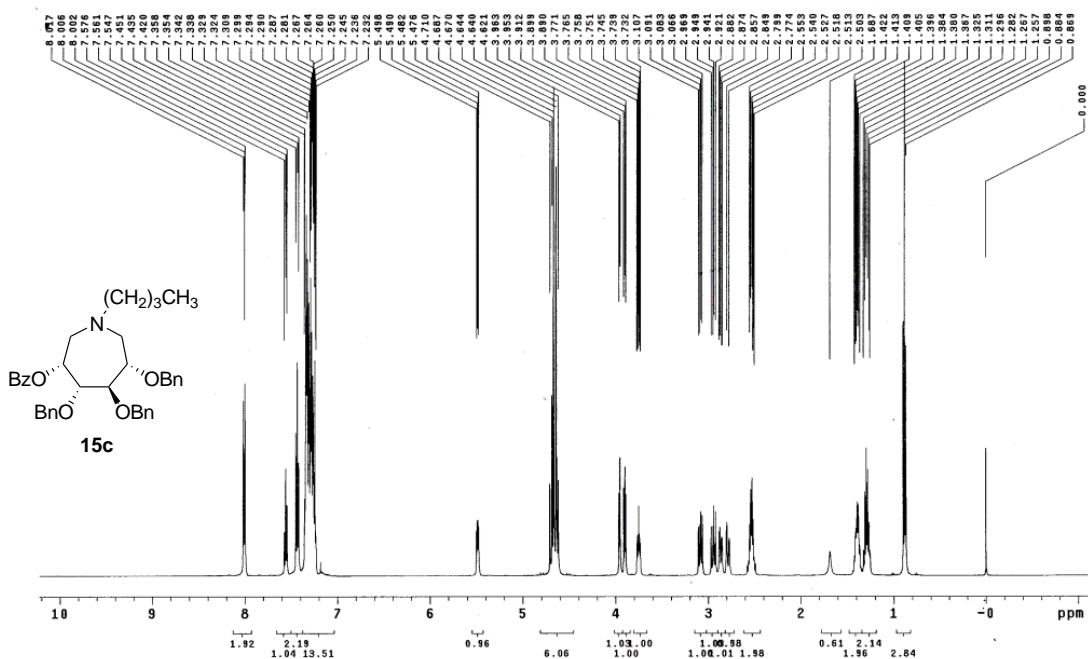

g1c-7-d0c4bz-2

Pulse Sequence: s2pu1  
 Solvent: cdcl3  
 Temp. 25.0 C / 298.1 K  
 Users: 1-14-87  
 File: g1c-7-d0c4bz-2-c  
 INOVA-500 "BMU500"

Relax. delay 1.000 sec  
 Pulse 64.3 degrees  
 Acq. time 1.000 sec  
 Width 31421.0 Hz  
 4800 repetitions  
 OBSERVE C13, 125.7004355 MHz  
 DECOUPLE H1, 499.9043860 MHz  
 Power 32 dB  
 continuously on  
 WALTZ-16 modulated  
 DATA PROCESSING  
 Line broadening 3.0 Hz  
 FT size 65538  
 Total time 17 hr, 51 min, 25 sec

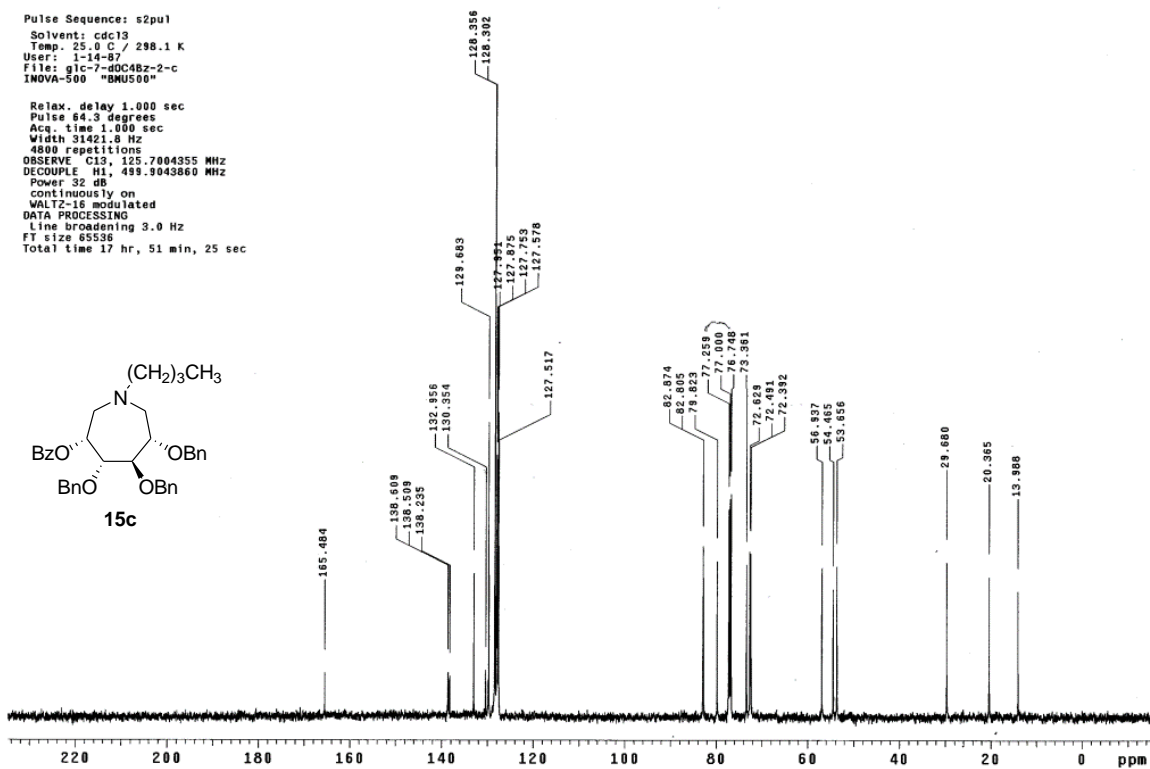

g1c-7-d0C4Bz-2

Pulse Sequence: gCOSY  
Solvent: cdcl3  
Temp: 25.0 C / 298.1 K  
File: g1c-7-d0C4Bz-2-cosy  
INOVA-500 "DMU500"  
  
Relax. delay 1.000 sec  
Acq. time 0.205 sec  
Width 4990.0 Hz  
2D Width 4990.0 Hz  
8 repetitions  
512 increments  
OBSERVE H1: 499.9019071 MHz  
DATA PROCESSING  
Sg. sine bell 0.103 sec  
F1 DATA PROCESSING  
Sg. sine bell 0.051 sec  
F1 size 8192 x 8192  
Total time 1 hr, 26 min, 59 sec

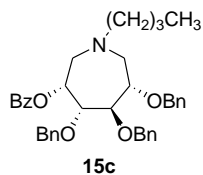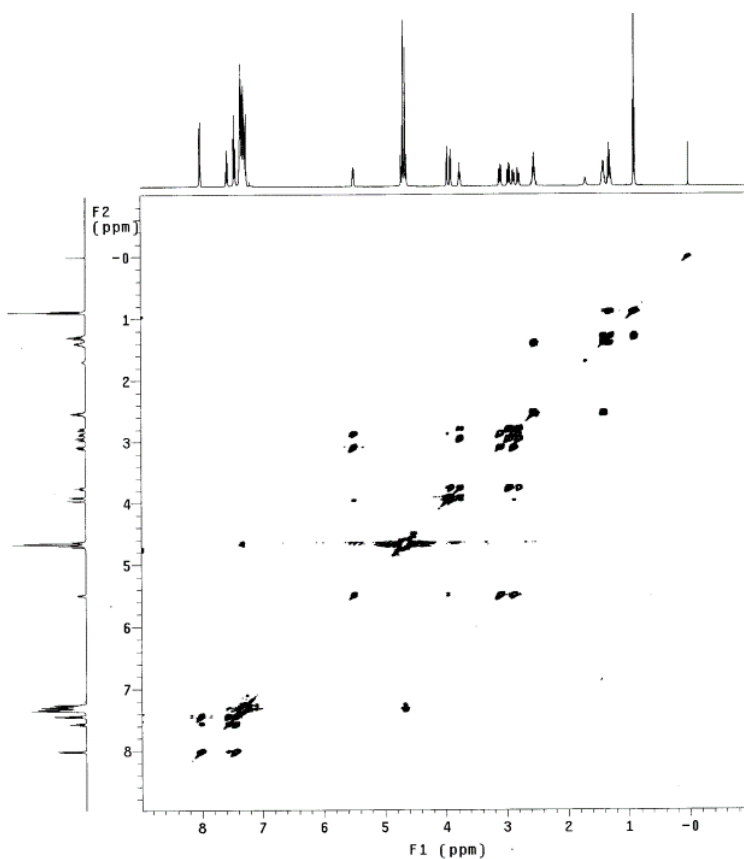

g1c-7-d0C4Bz-2

File: PROTON  
Pulse Sequence: NOESY  
Solvent: cdcl3  
Temp: 25.0 C / 298.1 K  
INOVA-500 "DMU500"  
  
Relax. delay 1.000 sec  
Mixing 0.600 sec  
Acq. time 0.204 sec  
Width 5007.5 Hz  
2D Width 5007.5 Hz  
32 repetitions  
2 x 256 increments  
Gauss apodization 0.094 sec  
F1 DATA PROCESSING  
Gauss apodization 0.029 sec  
F1 size 4096 x 4096  
Total time 8 hr, 24 min, 25 sec

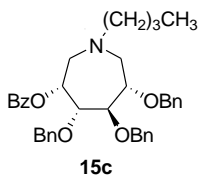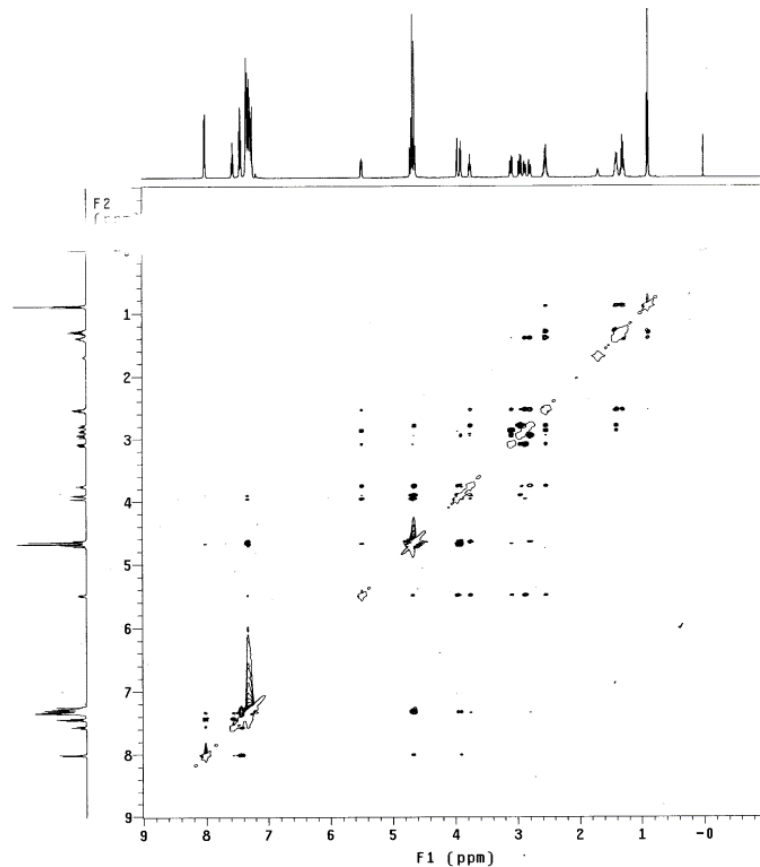



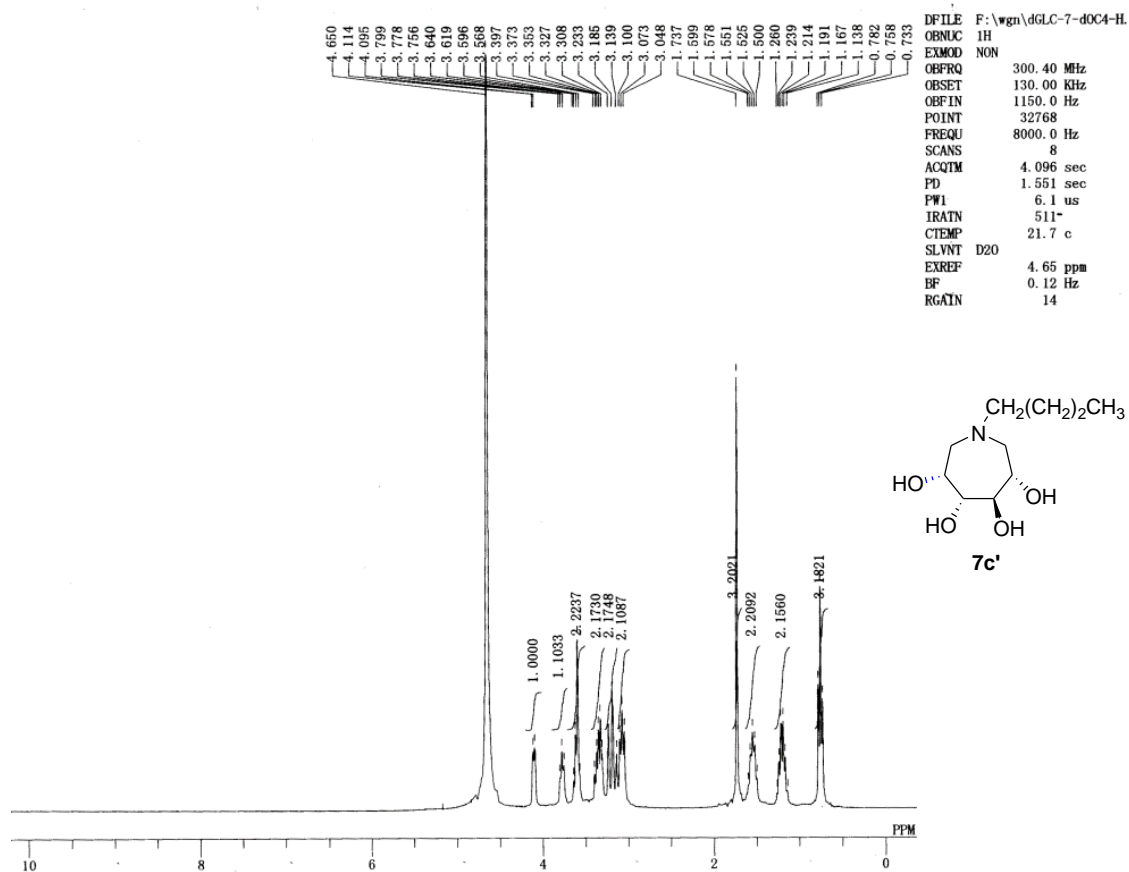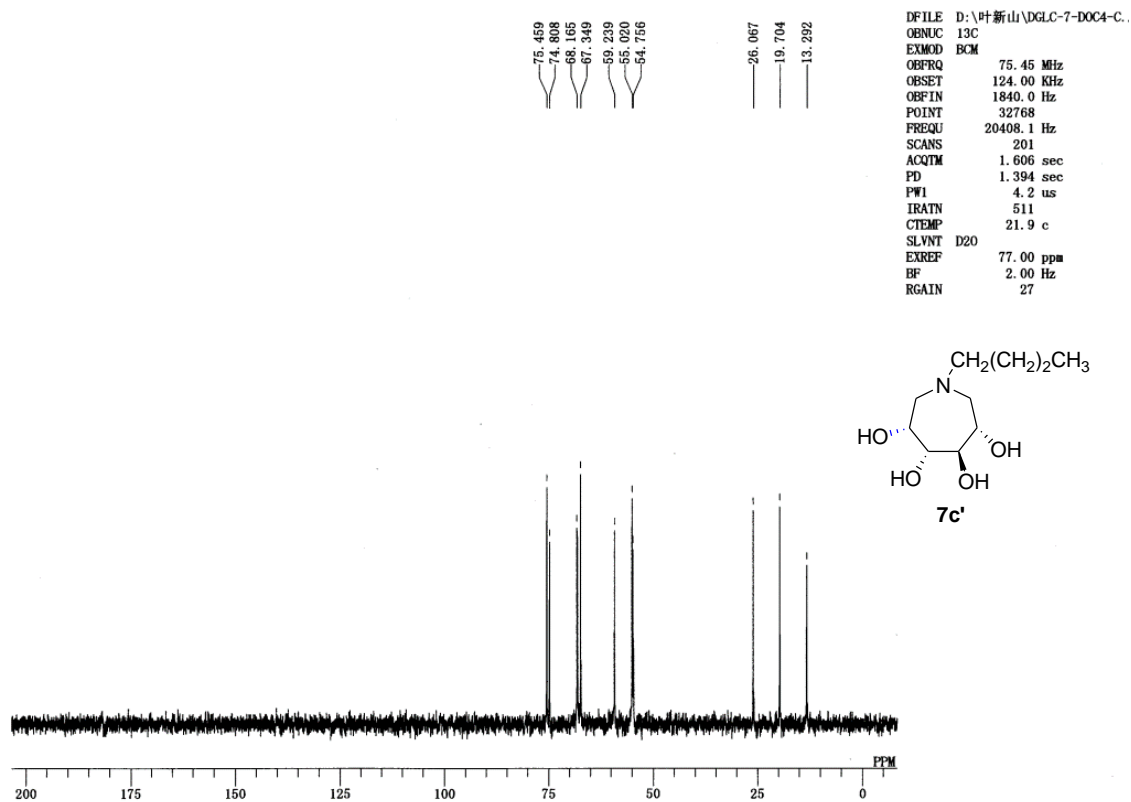

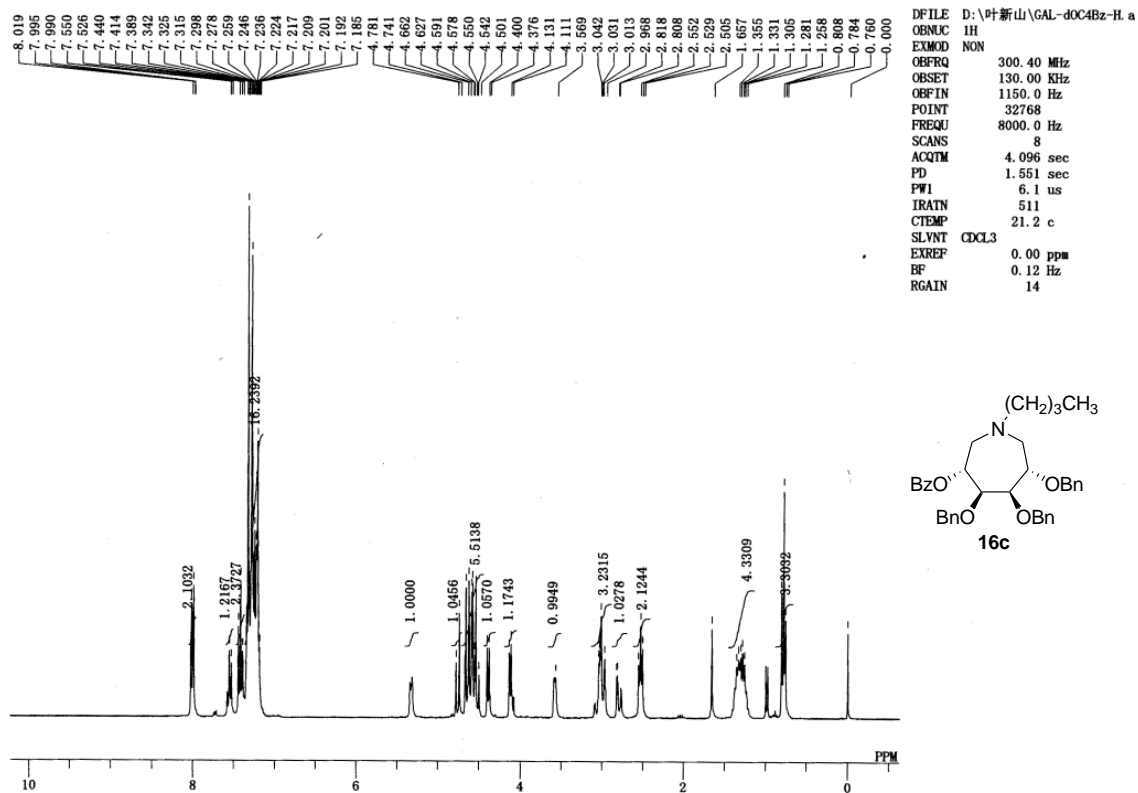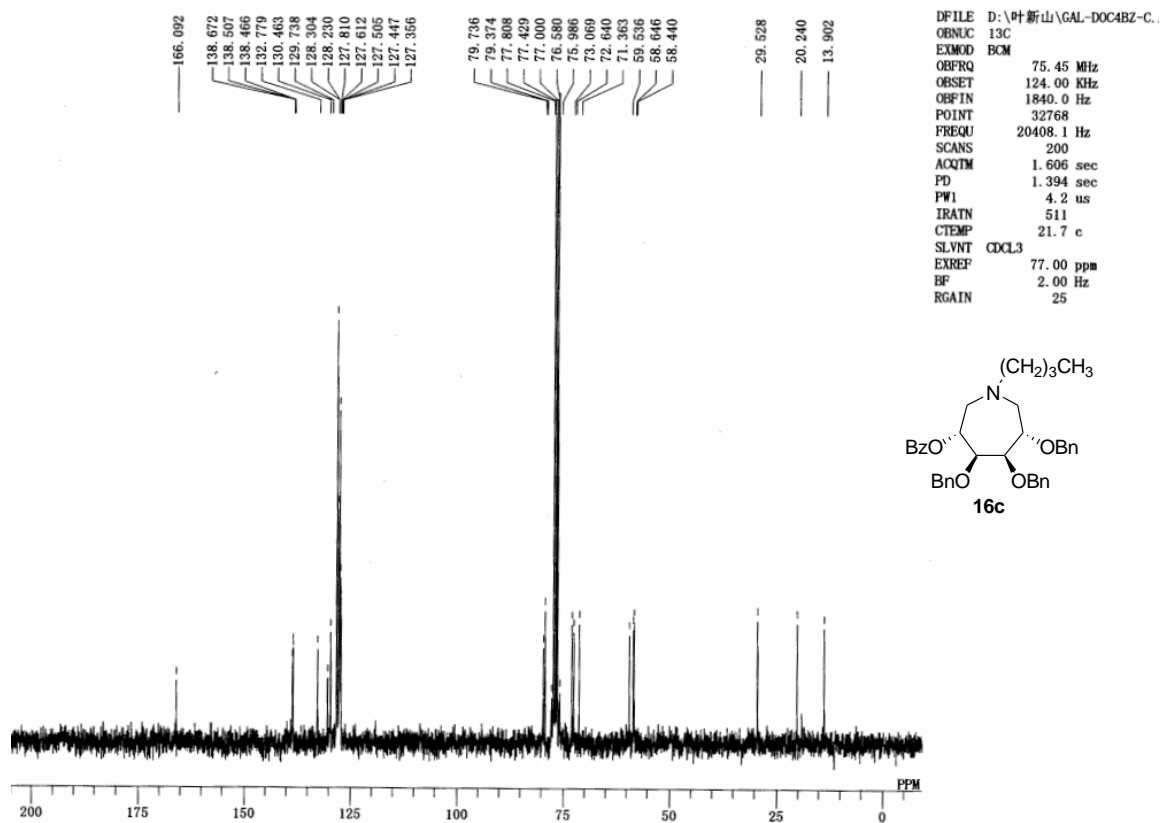

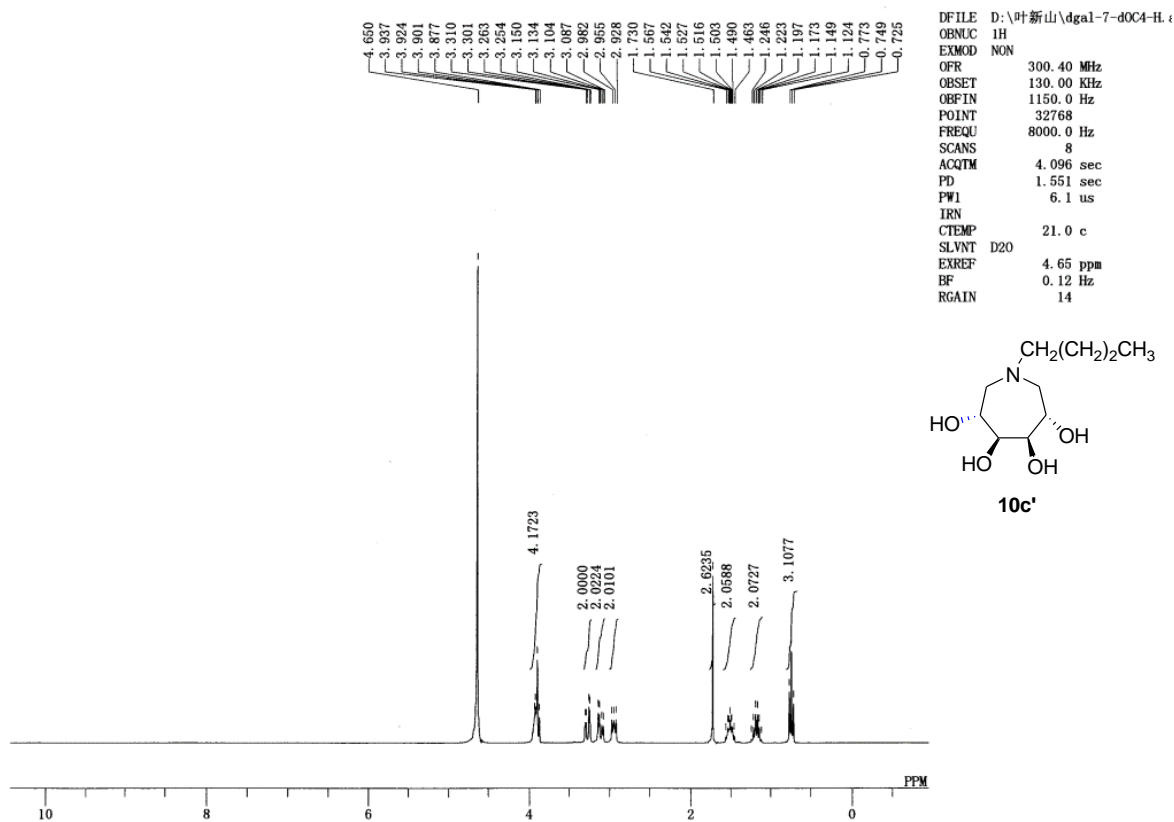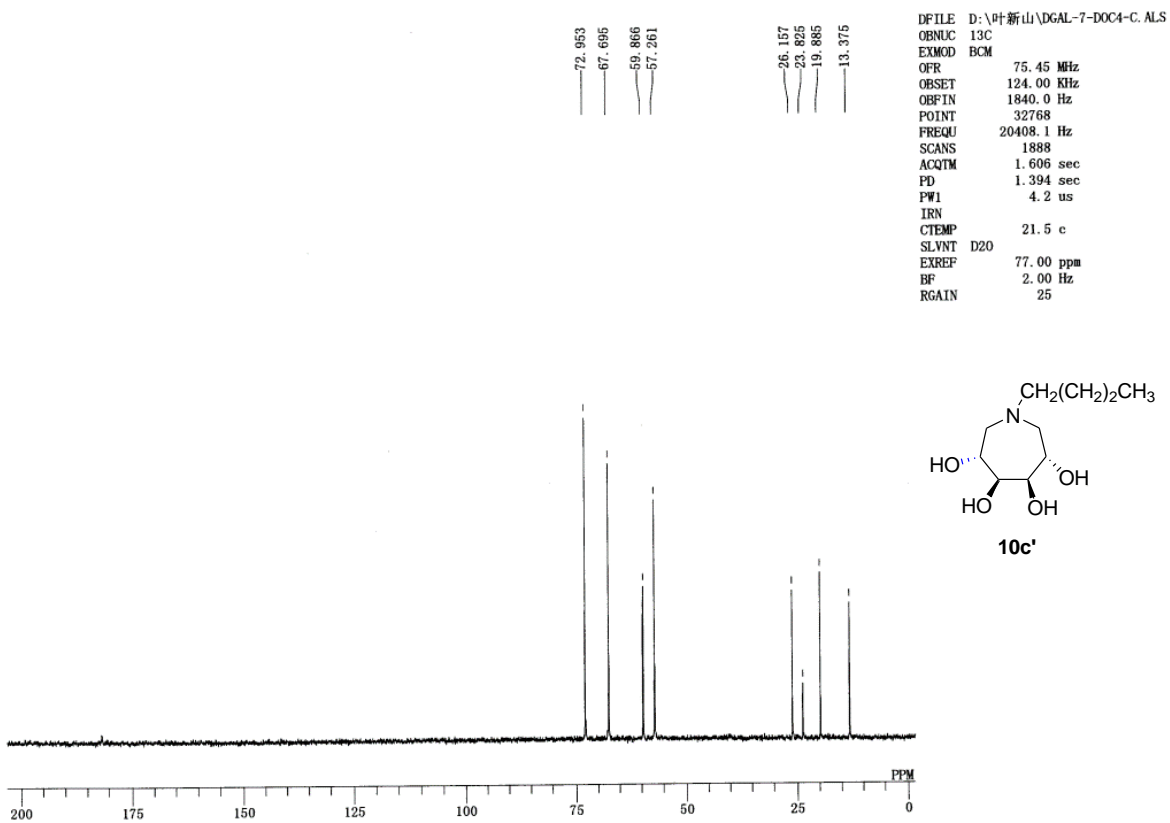

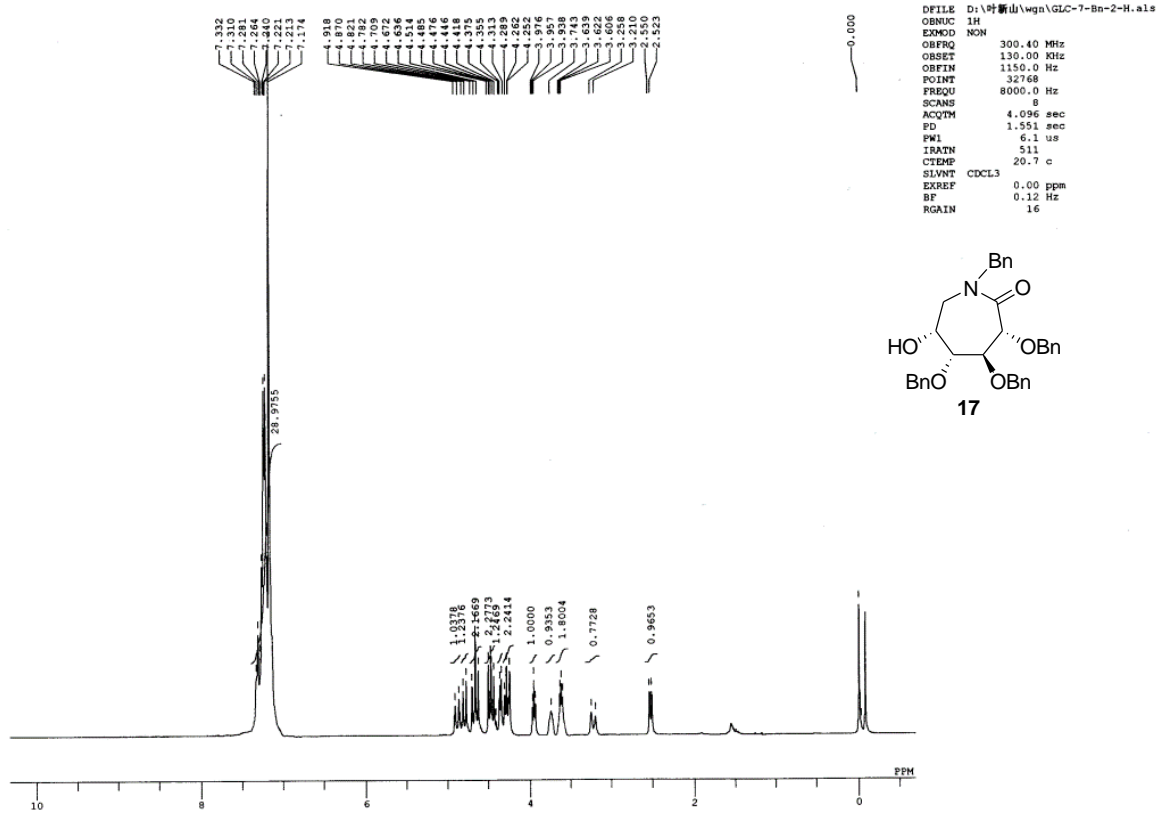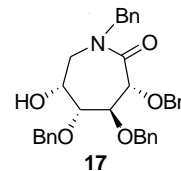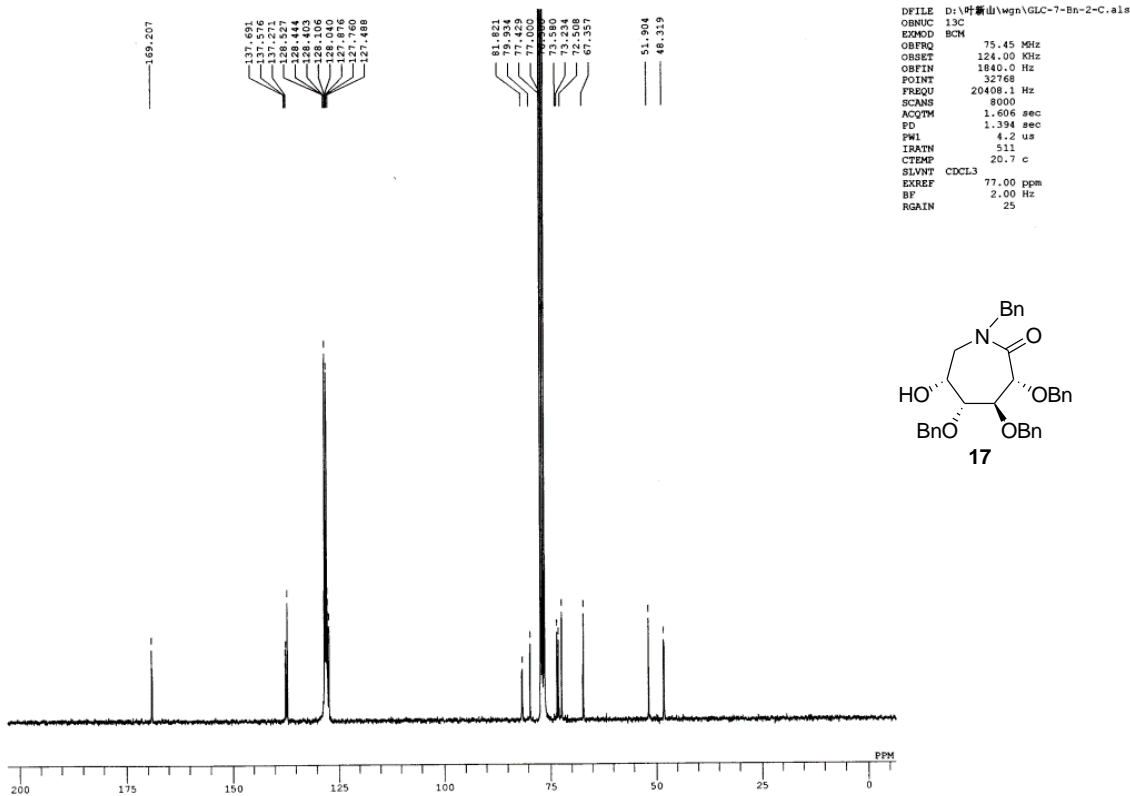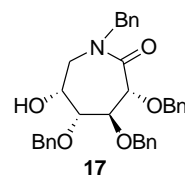

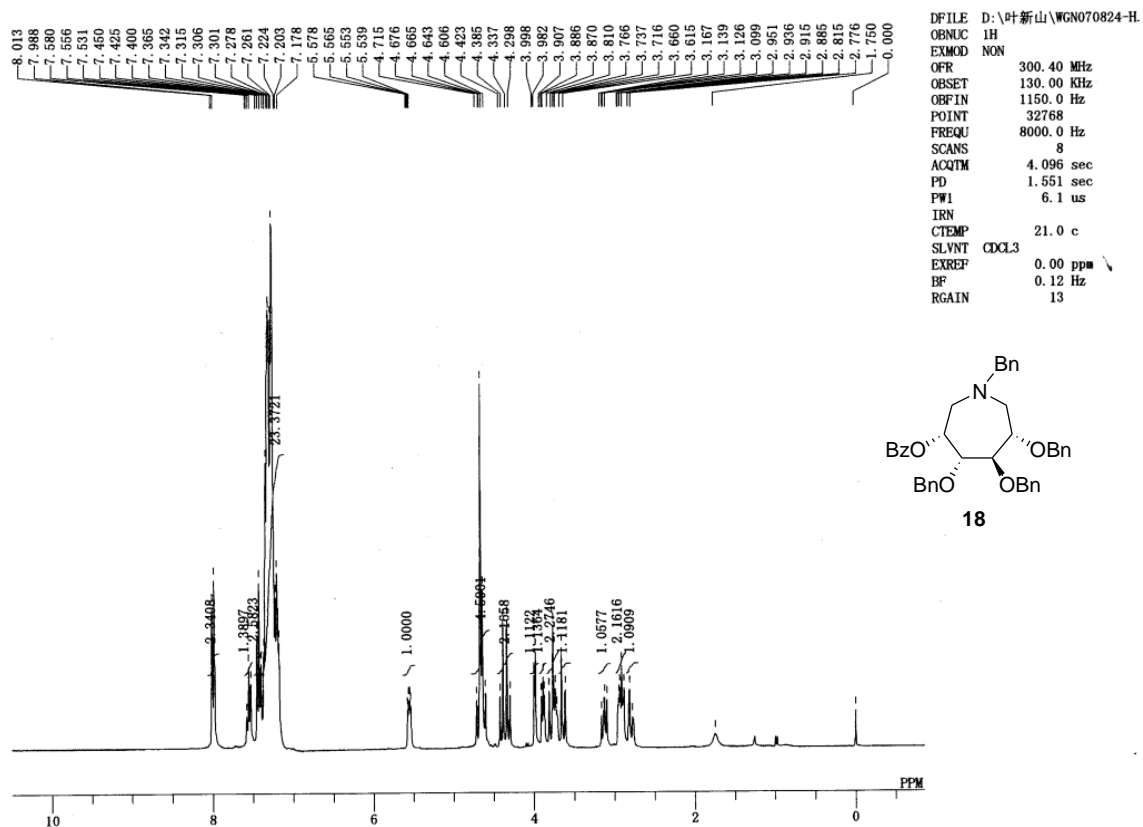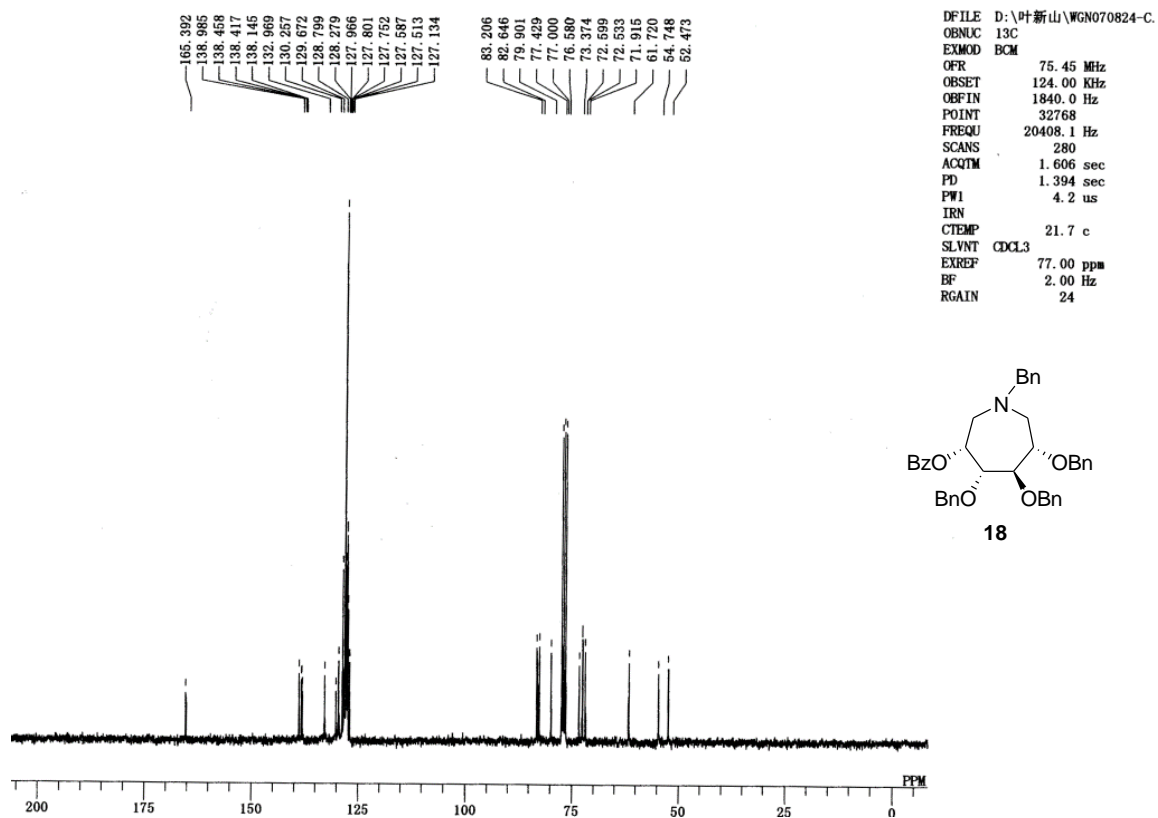

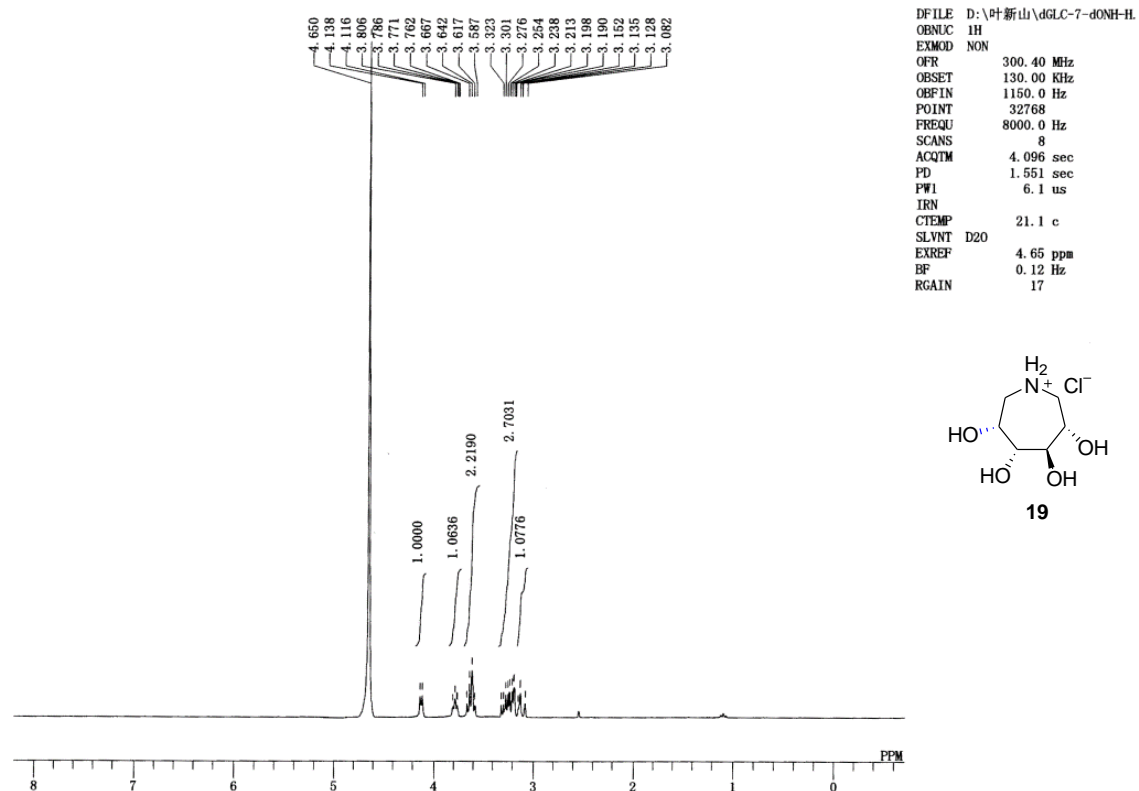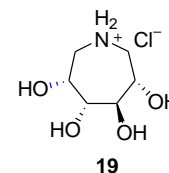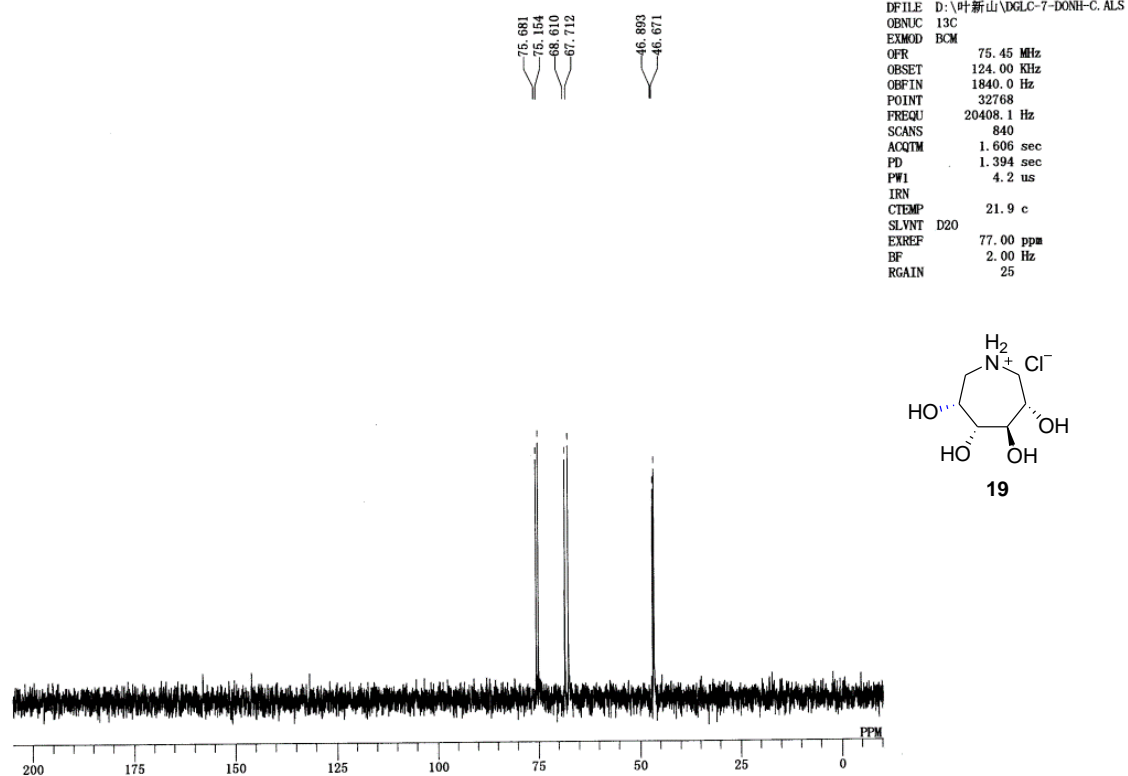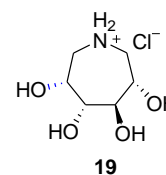

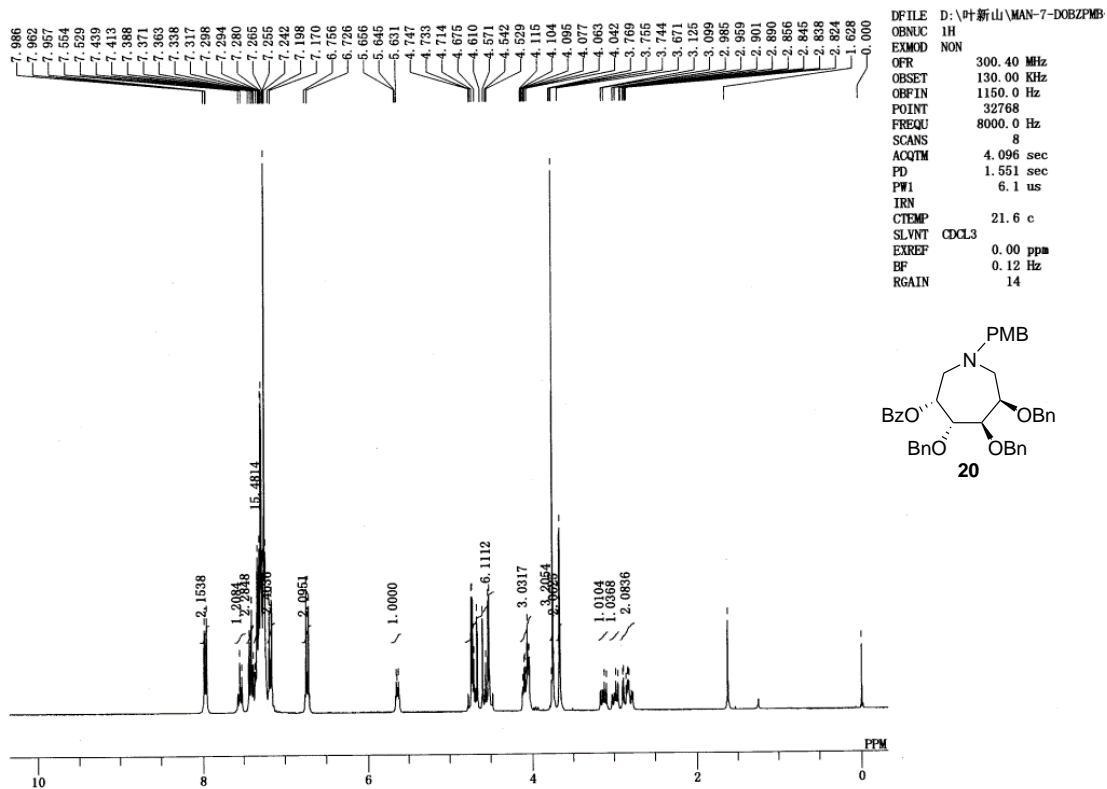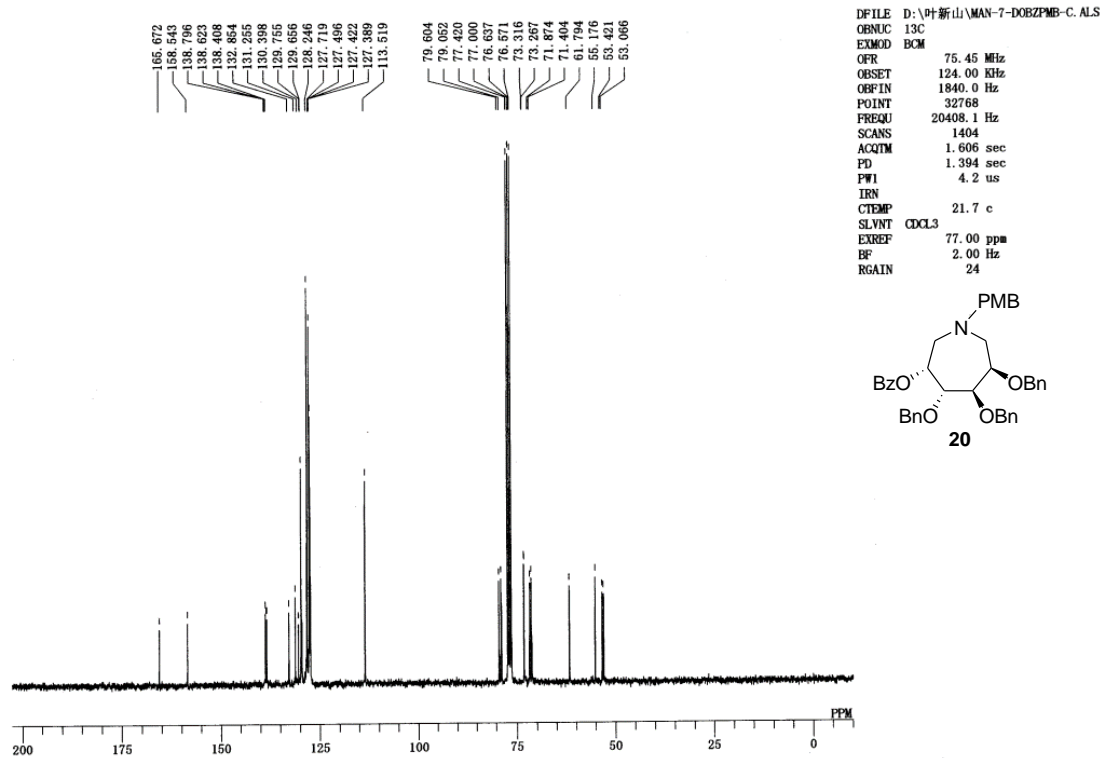

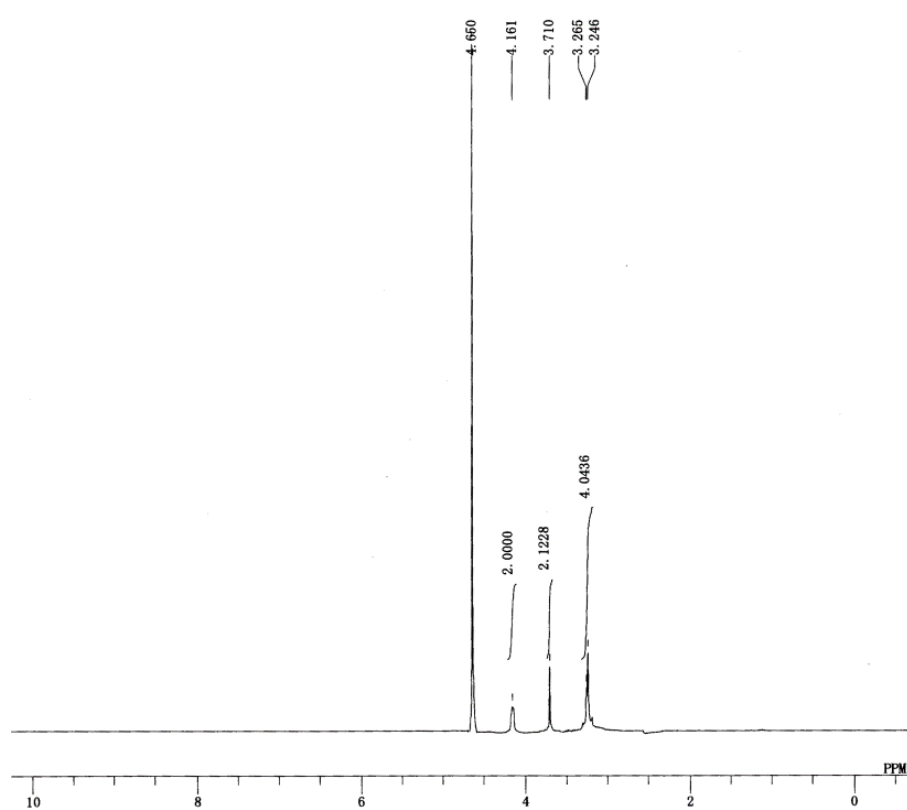

D:\叶新山\zman-7-dONH-H.  
DFILE D:\叶新山\zman-7-dONH-H.  
OBNUC 1H  
EXMOD NON  
OFR 300.40 MHz  
OBSET 130.00 KHz  
OBFIN 1150.0 Hz  
POINT 32768  
FREQU 8000.0 Hz  
SCANS 8  
ACQTM 4.096 sec  
PD 1.551 sec  
PW1 6.1 us  
IRN  
CTEMP 21.6 c  
SLVNT D2O  
EXREF 4.65 ppm  
BF 0.12 Hz  
RGAIN 16

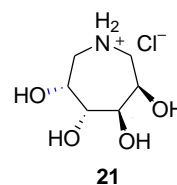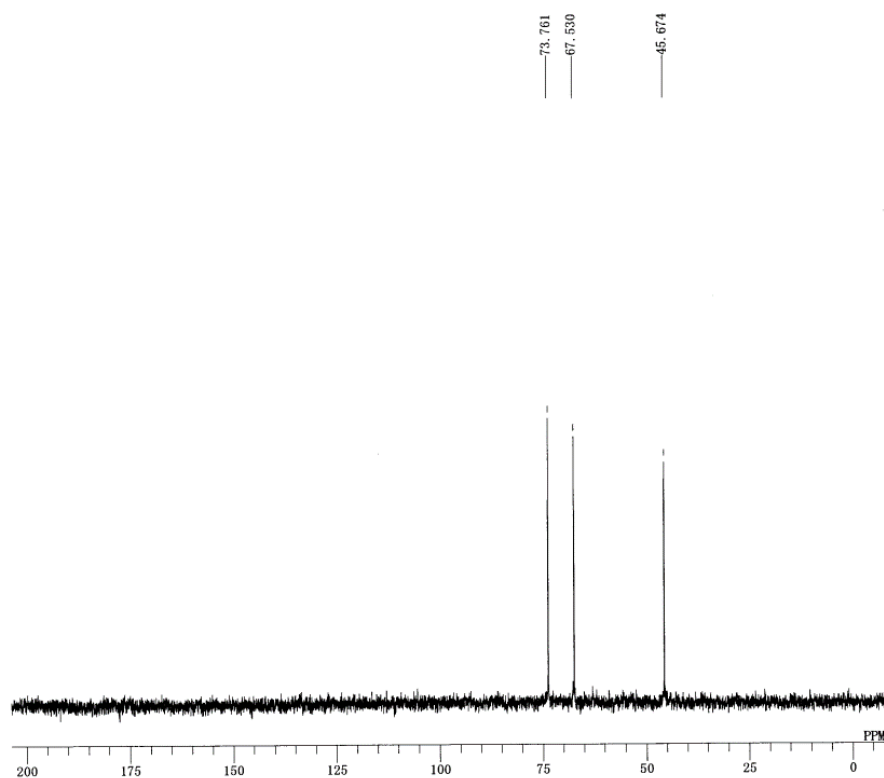

D:\叶新山\DMAN-7-DONH-C.  
DFILE D:\叶新山\DMAN-7-DONH-C.  
OBNUC 13C  
EXMOD BCM  
OFR 75.45 MHz  
OBSET 124.00 KHz  
OBFIN 1840.0 Hz  
POINT 32768  
FREQU 20408.1 Hz  
SCANS 912  
ACQTM 1.606 sec  
PD 1.394 sec  
PW1 4.2 us  
IRN  
CTEMP 21.7 c  
SLVNT D2O  
EXREF 77.00 ppm  
BF 2.00 Hz  
RGAIN 25

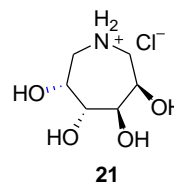

Supplement: c2ob06987c.pdf [file c2ob06987c.pdf]
